# Supplementary material for: Spatial modeling reveals nuclear phosphorylation and subcellular shuttling of YAP upon drug-induced liver injury
Source: eLife. 2022 Oct 18;11:e78540. doi: 10.7554/eLife.78540 (PMC9578710; doi:10.7554/eLife.78540)
Supplement: Supplementary file 1. [file elife-78540-supp1.xlsx]

## Sheet: Sheet1
	reaction	model	value
0	diffusion	YAP_model_2021-12-27_12.53.50.xml	4.37533
1	diffusion_phosph	YAP_model_2021-12-27_12.53.50.xml	1.04862
2	phosphorylation	YAP_model_2021-12-27_12.53.50.xml	0.0371138
3	dephosporylation	YAP_model_2021-12-27_12.53.50.xml	0.480722
4	translation	YAP_model_2021-12-27_12.53.50.xml	0.00911814
5	degradation	YAP_model_2021-12-27_12.53.50.xml	0.00624466
6	import	YAP_model_2021-12-27_12.53.50.xml	9.60239e-15
7	export	YAP_model_2021-12-27_12.53.50.xml	2.13304e-15
8	diffusion	YAP_model_2021-12-27_12.59.12.xml	5.04123
9	diffusion_phosph	YAP_model_2021-12-27_12.59.12.xml	1.03797
10	phosphorylation	YAP_model_2021-12-27_12.59.12.xml	0.0242715
11	dephosporylation	YAP_model_2021-12-27_12.59.12.xml	0.0306131
12	translation	YAP_model_2021-12-27_12.59.12.xml	0.00280819
13	degradation	YAP_model_2021-12-27_12.59.12.xml	0.00800893
14	import	YAP_model_2021-12-27_12.59.12.xml	9.91525e-15
15	export	YAP_model_2021-12-27_12.59.12.xml	4.45553e-16
16	diffusion	YAP_model_2021-12-27_13.12.23.xml	7.04185
17	diffusion_phosph	YAP_model_2021-12-27_13.12.23.xml	1.20094
18	phosphorylation	YAP_model_2021-12-27_13.12.23.xml	0.0302638
19	dephosporylation	YAP_model_2021-12-27_13.12.23.xml	0.373088
20	translation	YAP_model_2021-12-27_13.12.23.xml	0.00198533
21	degradation	YAP_model_2021-12-27_13.12.23.xml	0.00585962
22	import	YAP_model_2021-12-27_13.12.23.xml	9.8097e-15
23	export	YAP_model_2021-12-27_13.12.23.xml	6.85916e-15
24	diffusion	YAP_model_2021-12-27_13.15.41.xml	8.47256
25	diffusion_phosph	YAP_model_2021-12-27_13.15.41.xml	1.02443
26	phosphorylation	YAP_model_2021-12-27_13.15.41.xml	0.261832
27	dephosporylation	YAP_model_2021-12-27_13.15.41.xml	0.30234
28	translation	YAP_model_2021-12-27_13.15.41.xml	0.00553845
29	degradation	YAP_model_2021-12-27_13.15.41.xml	0.00721176
30	import	YAP_model_2021-12-27_13.15.41.xml	3.18464e-15
31	export	YAP_model_2021-12-27_13.15.41.xml	1.16007e-16
32	diffusion	YAP_model_2021-12-27_13.55.09.xml	6.17162
33	diffusion_phosph	YAP_model_2021-12-27_13.55.09.xml	1.278
34	phosphorylation	YAP_model_2021-12-27_13.55.09.xml	0.0167927
35	dephosporylation	YAP_model_2021-12-27_13.55.09.xml	0.0186153
36	translation	YAP_model_2021-12-27_13.55.09.xml	0.00519156
37	degradation	YAP_model_2021-12-27_13.55.09.xml	0.00854558
38	import	YAP_model_2021-12-27_13.55.09.xml	7.62483e-15
39	export	YAP_model_2021-12-27_13.55.09.xml	7.96632e-15
40	diffusion	YAP_model_2021-12-27_13.55.17.xml	3.94175
41	diffusion_phosph	YAP_model_2021-12-27_13.55.17.xml	1.0205
42	phosphorylation	YAP_model_2021-12-27_13.55.17.xml	0.0780538
43	dephosporylation	YAP_model_2021-12-27_13.55.17.xml	0.367765
44	translation	YAP_model_2021-12-27_13.55.17.xml	0.00365809
45	degradation	YAP_model_2021-12-27_13.55.17.xml	0.00698644
46	import	YAP_model_2021-12-27_13.55.17.xml	9.56822e-15
47	export	YAP_model_2021-12-27_13.55.17.xml	3.36328e-16
48	diffusion	YAP_model_2021-12-27_14.07.46.xml	7.70733
49	diffusion_phosph	YAP_model_2021-12-27_14.07.46.xml	1.24188
50	phosphorylation	YAP_model_2021-12-27_14.07.46.xml	0.0251372
51	dephosporylation	YAP_model_2021-12-27_14.07.46.xml	0.187494
52	translation	YAP_model_2021-12-27_14.07.46.xml	0.00396365
53	degradation	YAP_model_2021-12-27_14.07.46.xml	0.00722611
54	import	YAP_model_2021-12-27_14.07.46.xml	2.62799e-15
55	export	YAP_model_2021-12-27_14.07.46.xml	9.82729e-15
56	diffusion	YAP_model_2021-12-27_14.15.19.xml	6.03114
57	diffusion_phosph	YAP_model_2021-12-27_14.15.19.xml	1.06447
58	phosphorylation	YAP_model_2021-12-27_14.15.19.xml	0.0354767
59	dephosporylation	YAP_model_2021-12-27_14.15.19.xml	0.0694114
60	translation	YAP_model_2021-12-27_14.15.19.xml	0.0045018
61	degradation	YAP_model_2021-12-27_14.15.19.xml	0.00676432
62	import	YAP_model_2021-12-27_14.15.19.xml	2.61013e-15
63	export	YAP_model_2021-12-27_14.15.19.xml	2.49259e-16
64	diffusion	YAP_model_2021-12-27_15.01.05.xml	7.51147
65	diffusion_phosph	YAP_model_2021-12-27_15.01.05.xml	1.33202
66	phosphorylation	YAP_model_2021-12-27_15.01.05.xml	0.0349531
67	dephosporylation	YAP_model_2021-12-27_15.01.05.xml	0.29057
68	translation	YAP_model_2021-12-27_15.01.05.xml	0.00622033
69	degradation	YAP_model_2021-12-27_15.01.05.xml	0.00783939
70	import	YAP_model_2021-12-27_15.01.05.xml	3.85334e-15
71	export	YAP_model_2021-12-27_15.01.05.xml	2.48493e-15
72	diffusion	YAP_model_2021-12-27_15.05.10.xml	7.14465
73	diffusion_phosph	YAP_model_2021-12-27_15.05.10.xml	1.24985
74	phosphorylation	YAP_model_2021-12-27_15.05.10.xml	0.0453176
75	dephosporylation	YAP_model_2021-12-27_15.05.10.xml	0.422255
76	translation	YAP_model_2021-12-27_15.05.10.xml	0.00773702
77	degradation	YAP_model_2021-12-27_15.05.10.xml	0.00899075
78	import	YAP_model_2021-12-27_15.05.10.xml	4.0184e-15
79	export	YAP_model_2021-12-27_15.05.10.xml	7.50679e-15
80	diffusion	YAP_model_2021-12-27_15.08.03.xml	4.71698
81	diffusion_phosph	YAP_model_2021-12-27_15.08.03.xml	1.14061
82	phosphorylation	YAP_model_2021-12-27_15.08.03.xml	0.1537
83	dephosporylation	YAP_model_2021-12-27_15.08.03.xml	0.196855
84	translation	YAP_model_2021-12-27_15.08.03.xml	0.00465973
85	degradation	YAP_model_2021-12-27_15.08.03.xml	0.00816638
86	import	YAP_model_2021-12-27_15.08.03.xml	7.97337e-15
87	export	YAP_model_2021-12-27_15.08.03.xml	1.34836e-16
88	diffusion	YAP_model_2021-12-27_15.16.43.xml	7.57322
89	diffusion_phosph	YAP_model_2021-12-27_15.16.43.xml	1.09158
90	phosphorylation	YAP_model_2021-12-27_15.16.43.xml	0.047021
91	dephosporylation	YAP_model_2021-12-27_15.16.43.xml	0.345368
92	translation	YAP_model_2021-12-27_15.16.43.xml	0.00689551
93	degradation	YAP_model_2021-12-27_15.16.43.xml	0.00918557
94	import	YAP_model_2021-12-27_15.16.43.xml	8.90543e-15
95	export	YAP_model_2021-12-27_15.16.43.xml	9.10848e-15
96	diffusion	YAP_model_2021-12-27_16.09.37.xml	7.68573
97	diffusion_phosph	YAP_model_2021-12-27_16.09.37.xml	1.02827
98	phosphorylation	YAP_model_2021-12-27_16.09.37.xml	0.22473
99	dephosporylation	YAP_model_2021-12-27_16.09.37.xml	0.260721
100	translation	YAP_model_2021-12-27_16.09.37.xml	0.00987651
101	degradation	YAP_model_2021-12-27_16.09.37.xml	0.00854529
102	import	YAP_model_2021-12-27_16.09.37.xml	5.99421e-15
103	export	YAP_model_2021-12-27_16.09.37.xml	1.86693e-16
104	diffusion	YAP_model_2021-12-27_16.13.13.xml	6.21496
105	diffusion_phosph	YAP_model_2021-12-27_16.13.13.xml	1.0819
106	phosphorylation	YAP_model_2021-12-27_16.13.13.xml	0.0300751
107	dephosporylation	YAP_model_2021-12-27_16.13.13.xml	0.158534
108	translation	YAP_model_2021-12-27_16.13.13.xml	0.00536572
109	degradation	YAP_model_2021-12-27_16.13.13.xml	0.00982532
110	import	YAP_model_2021-12-27_16.13.13.xml	2.50756e-15
111	export	YAP_model_2021-12-27_16.13.13.xml	7.84929e-15
112	diffusion	YAP_model_2021-12-27_16.15.39.xml	5.12531
113	diffusion_phosph	YAP_model_2021-12-27_16.15.39.xml	1.08299
114	phosphorylation	YAP_model_2021-12-27_16.15.39.xml	0.0286257
115	dephosporylation	YAP_model_2021-12-27_16.15.39.xml	0.154417
116	translation	YAP_model_2021-12-27_16.15.39.xml	0.00271067
117	degradation	YAP_model_2021-12-27_16.15.39.xml	0.00994291
118	import	YAP_model_2021-12-27_16.15.39.xml	9.72249e-15
119	export	YAP_model_2021-12-27_16.15.39.xml	6.95028e-15
120	diffusion	YAP_model_2021-12-27_16.16.49.xml	5.95958
121	diffusion_phosph	YAP_model_2021-12-27_16.16.49.xml	1.24866
122	phosphorylation	YAP_model_2021-12-27_16.16.49.xml	0.0213898
123	dephosporylation	YAP_model_2021-12-27_16.16.49.xml	0.126468
124	translation	YAP_model_2021-12-27_16.16.49.xml	0.00612356
125	degradation	YAP_model_2021-12-27_16.16.49.xml	0.0062329
126	import	YAP_model_2021-12-27_16.16.49.xml	9.1404e-15
127	export	YAP_model_2021-12-27_16.16.49.xml	4.57753e-15
128	diffusion	YAP_model_2021-12-27_17.01.25.xml	5.24009
129	diffusion_phosph	YAP_model_2021-12-27_17.01.25.xml	1.20963
130	phosphorylation	YAP_model_2021-12-27_17.01.25.xml	0.019005
131	dephosporylation	YAP_model_2021-12-27_17.01.25.xml	0.14107
132	translation	YAP_model_2021-12-27_17.01.25.xml	0.00354047
133	degradation	YAP_model_2021-12-27_17.01.25.xml	0.00598008
134	import	YAP_model_2021-12-27_17.01.25.xml	8.64405e-15
135	export	YAP_model_2021-12-27_17.01.25.xml	2.36262e-15
136	diffusion	YAP_model_2021-12-27_17.12.24.xml	5.57516
137	diffusion_phosph	YAP_model_2021-12-27_17.12.24.xml	1.26651
138	phosphorylation	YAP_model_2021-12-27_17.12.24.xml	0.0131813
139	dephosporylation	YAP_model_2021-12-27_17.12.24.xml	0.0175156
140	translation	YAP_model_2021-12-27_17.12.24.xml	0.00471984
141	degradation	YAP_model_2021-12-27_17.12.24.xml	0.0069988
142	import	YAP_model_2021-12-27_17.12.24.xml	9.3841e-15
143	export	YAP_model_2021-12-27_17.12.24.xml	3.62291e-15
144	diffusion	YAP_model_2021-12-27_17.13.04.xml	6.34556
145	diffusion_phosph	YAP_model_2021-12-27_17.13.04.xml	1.06228
146	phosphorylation	YAP_model_2021-12-27_17.13.04.xml	0.0260624
147	dephosporylation	YAP_model_2021-12-27_17.13.04.xml	0.111726
148	translation	YAP_model_2021-12-27_17.13.04.xml	0.00359702
149	degradation	YAP_model_2021-12-27_17.13.04.xml	0.00937493
150	import	YAP_model_2021-12-27_17.13.04.xml	9.84611e-15
151	export	YAP_model_2021-12-27_17.13.04.xml	9.71447e-15
152	diffusion	YAP_model_2021-12-27_17.18.01.xml	4.48517
153	diffusion_phosph	YAP_model_2021-12-27_17.18.01.xml	1.01906
154	phosphorylation	YAP_model_2021-12-27_17.18.01.xml	0.0207113
155	dephosporylation	YAP_model_2021-12-27_17.18.01.xml	0.359595
156	translation	YAP_model_2021-12-27_17.18.01.xml	0.00713599
157	degradation	YAP_model_2021-12-27_17.18.01.xml	0.00530127
158	import	YAP_model_2021-12-27_17.18.01.xml	6.99331e-15
159	export	YAP_model_2021-12-27_17.18.01.xml	9.17112e-15
160	diffusion	YAP_model_2021-12-27_18.06.57.xml	5.25291
161	diffusion_phosph	YAP_model_2021-12-27_18.06.57.xml	1.08941
162	phosphorylation	YAP_model_2021-12-27_18.06.57.xml	0.0233679
163	dephosporylation	YAP_model_2021-12-27_18.06.57.xml	0.274765
164	translation	YAP_model_2021-12-27_18.06.57.xml	0.00632497
165	degradation	YAP_model_2021-12-27_18.06.57.xml	0.00609589
166	import	YAP_model_2021-12-27_18.06.57.xml	9.63375e-15
167	export	YAP_model_2021-12-27_18.06.57.xml	9.63433e-15
168	diffusion	YAP_model_2021-12-27_18.11.33.xml	7.73224
169	diffusion_phosph	YAP_model_2021-12-27_18.11.33.xml	1.33725
170	phosphorylation	YAP_model_2021-12-27_18.11.33.xml	0.0190334
171	dephosporylation	YAP_model_2021-12-27_18.11.33.xml	0.0456144
172	translation	YAP_model_2021-12-27_18.11.33.xml	0.00548122
173	degradation	YAP_model_2021-12-27_18.11.33.xml	0.00950362
174	import	YAP_model_2021-12-27_18.11.33.xml	6.25643e-15
175	export	YAP_model_2021-12-27_18.11.33.xml	9.83725e-15
176	diffusion	YAP_model_2021-12-27_18.22.37.xml	6.22277
177	diffusion_phosph	YAP_model_2021-12-27_18.22.37.xml	1.27385
178	phosphorylation	YAP_model_2021-12-27_18.22.37.xml	0.0251104
179	dephosporylation	YAP_model_2021-12-27_18.22.37.xml	0.175639
180	translation	YAP_model_2021-12-27_18.22.37.xml	0.00549481
181	degradation	YAP_model_2021-12-27_18.22.37.xml	0.0075516
182	import	YAP_model_2021-12-27_18.22.37.xml	9.94757e-15
183	export	YAP_model_2021-12-27_18.22.37.xml	6.91585e-15
184	diffusion	YAP_model_2021-12-27_18.24.46.xml	8.92437
185	diffusion_phosph	YAP_model_2021-12-27_18.24.46.xml	1.29781
186	phosphorylation	YAP_model_2021-12-27_18.24.46.xml	0.0331982
187	dephosporylation	YAP_model_2021-12-27_18.24.46.xml	0.379133
188	translation	YAP_model_2021-12-27_18.24.46.xml	0.00911134
189	degradation	YAP_model_2021-12-27_18.24.46.xml	0.00766694
190	import	YAP_model_2021-12-27_18.24.46.xml	5.46619e-15
191	export	YAP_model_2021-12-27_18.24.46.xml	7.31039e-15
192	diffusion	YAP_model_2021-12-27_19.05.23.xml	7.21353
193	diffusion_phosph	YAP_model_2021-12-27_19.05.23.xml	1.01574
194	phosphorylation	YAP_model_2021-12-27_19.05.23.xml	0.0197993
195	dephosporylation	YAP_model_2021-12-27_19.05.23.xml	0.136305
196	translation	YAP_model_2021-12-27_19.05.23.xml	0.00348688
197	degradation	YAP_model_2021-12-27_19.05.23.xml	0.00539018
198	import	YAP_model_2021-12-27_19.05.23.xml	9.40836e-15
199	export	YAP_model_2021-12-27_19.05.23.xml	2.47984e-15
200	diffusion	YAP_model_2021-12-27_19.08.22.xml	5.79075
201	diffusion_phosph	YAP_model_2021-12-27_19.08.22.xml	1.04547
202	phosphorylation	YAP_model_2021-12-27_19.08.22.xml	0.0584266
203	dephosporylation	YAP_model_2021-12-27_19.08.22.xml	0.157425
204	translation	YAP_model_2021-12-27_19.08.22.xml	0.00462296
205	degradation	YAP_model_2021-12-27_19.08.22.xml	0.00540547
206	import	YAP_model_2021-12-27_19.08.22.xml	6.22161e-15
207	export	YAP_model_2021-12-27_19.08.22.xml	2.23566e-16
208	diffusion	YAP_model_2021-12-27_19.27.53.xml	6.44949
209	diffusion_phosph	YAP_model_2021-12-27_19.27.53.xml	1.05955
210	phosphorylation	YAP_model_2021-12-27_19.27.53.xml	0.0333429
211	dephosporylation	YAP_model_2021-12-27_19.27.53.xml	0.143391
212	translation	YAP_model_2021-12-27_19.27.53.xml	0.00744473
213	degradation	YAP_model_2021-12-27_19.27.53.xml	0.00937141
214	import	YAP_model_2021-12-27_19.27.53.xml	5.55665e-15
215	export	YAP_model_2021-12-27_19.27.53.xml	3.71276e-15
216	diffusion	YAP_model_2021-12-27_19.32.45.xml	7.83252
217	diffusion_phosph	YAP_model_2021-12-27_19.32.45.xml	1.12327
218	phosphorylation	YAP_model_2021-12-27_19.32.45.xml	0.0338508
219	dephosporylation	YAP_model_2021-12-27_19.32.45.xml	0.346664
220	translation	YAP_model_2021-12-27_19.32.45.xml	0.00534777
221	degradation	YAP_model_2021-12-27_19.32.45.xml	0.00810169
222	import	YAP_model_2021-12-27_19.32.45.xml	7.44238e-15
223	export	YAP_model_2021-12-27_19.32.45.xml	7.86794e-15
224	diffusion	YAP_model_2021-12-27_20.02.27.xml	5.75716
225	diffusion_phosph	YAP_model_2021-12-27_20.02.27.xml	1.37937
226	phosphorylation	YAP_model_2021-12-27_20.02.27.xml	0.0237636
227	dephosporylation	YAP_model_2021-12-27_20.02.27.xml	0.0674907
228	translation	YAP_model_2021-12-27_20.02.27.xml	0.00229599
229	degradation	YAP_model_2021-12-27_20.02.27.xml	0.0070442
230	import	YAP_model_2021-12-27_20.02.27.xml	5.8131e-15
231	export	YAP_model_2021-12-27_20.02.27.xml	5.73679e-16
232	diffusion	YAP_model_2021-12-27_20.16.53.xml	7.04162
233	diffusion_phosph	YAP_model_2021-12-27_20.16.53.xml	1.38058
234	phosphorylation	YAP_model_2021-12-27_20.16.53.xml	0.0139032
235	dephosporylation	YAP_model_2021-12-27_20.16.53.xml	0.0101089
236	translation	YAP_model_2021-12-27_20.16.53.xml	0.00921276
237	degradation	YAP_model_2021-12-27_20.16.53.xml	0.00990684
238	import	YAP_model_2021-12-27_20.16.53.xml	6.54016e-15
239	export	YAP_model_2021-12-27_20.16.53.xml	2.14317e-15
240	diffusion	YAP_model_2021-12-27_20.23.33.xml	4.78545
241	diffusion_phosph	YAP_model_2021-12-27_20.23.33.xml	1.03229
242	phosphorylation	YAP_model_2021-12-27_20.23.33.xml	0.0470916
243	dephosporylation	YAP_model_2021-12-27_20.23.33.xml	0.485906
244	translation	YAP_model_2021-12-27_20.23.33.xml	0.00691105
245	degradation	YAP_model_2021-12-27_20.23.33.xml	0.00883461
246	import	YAP_model_2021-12-27_20.23.33.xml	9.12678e-15
247	export	YAP_model_2021-12-27_20.23.33.xml	1.75307e-15
248	diffusion	YAP_model_2021-12-27_20.31.10.xml	6.12866
249	diffusion_phosph	YAP_model_2021-12-27_20.31.10.xml	1.09203
250	phosphorylation	YAP_model_2021-12-27_20.31.10.xml	0.0827539
251	dephosporylation	YAP_model_2021-12-27_20.31.10.xml	0.0329466
252	translation	YAP_model_2021-12-27_20.31.10.xml	0.00187092
253	degradation	YAP_model_2021-12-27_20.31.10.xml	0.00739328
254	import	YAP_model_2021-12-27_20.31.10.xml	9.13109e-15
255	export	YAP_model_2021-12-27_20.31.10.xml	1.12653e-16
256	diffusion	YAP_model_2021-12-27_21.14.27.xml	5.35418
257	diffusion_phosph	YAP_model_2021-12-27_21.14.27.xml	1.18336
258	phosphorylation	YAP_model_2021-12-27_21.14.27.xml	0.0127908
259	dephosporylation	YAP_model_2021-12-27_21.14.27.xml	0.012301
260	translation	YAP_model_2021-12-27_21.14.27.xml	0.00537794
261	degradation	YAP_model_2021-12-27_21.14.27.xml	0.0069095
262	import	YAP_model_2021-12-27_21.14.27.xml	8.00733e-15
263	export	YAP_model_2021-12-27_21.14.27.xml	1.06141e-15
264	diffusion	YAP_model_2021-12-27_21.24.30.xml	6.27226
265	diffusion_phosph	YAP_model_2021-12-27_21.24.30.xml	1.15749
266	phosphorylation	YAP_model_2021-12-27_21.24.30.xml	0.0400145
267	dephosporylation	YAP_model_2021-12-27_21.24.30.xml	0.422808
268	translation	YAP_model_2021-12-27_21.24.30.xml	0.00912988
269	degradation	YAP_model_2021-12-27_21.24.30.xml	0.00856179
270	import	YAP_model_2021-12-27_21.24.30.xml	9.06277e-15
271	export	YAP_model_2021-12-27_21.24.30.xml	3.83832e-15
272	diffusion	YAP_model_2021-12-27_21.25.47.xml	5.19931
273	diffusion_phosph	YAP_model_2021-12-27_21.25.47.xml	1.06646
274	phosphorylation	YAP_model_2021-12-27_21.25.47.xml	0.0348865
275	dephosporylation	YAP_model_2021-12-27_21.25.47.xml	0.226462
276	translation	YAP_model_2021-12-27_21.25.47.xml	0.00912139
277	degradation	YAP_model_2021-12-27_21.25.47.xml	0.00827551
278	import	YAP_model_2021-12-27_21.25.47.xml	9.11456e-15
279	export	YAP_model_2021-12-27_21.25.47.xml	1.08862e-15
280	diffusion	YAP_model_2021-12-27_21.33.09.xml	9.96774
281	diffusion_phosph	YAP_model_2021-12-27_21.33.09.xml	1.28129
282	phosphorylation	YAP_model_2021-12-27_21.33.09.xml	0.0274704
283	dephosporylation	YAP_model_2021-12-27_21.33.09.xml	0.118011
284	translation	YAP_model_2021-12-27_21.33.09.xml	0.00997091
285	degradation	YAP_model_2021-12-27_21.33.09.xml	0.00942685
286	import	YAP_model_2021-12-27_21.33.09.xml	1.5999e-15
287	export	YAP_model_2021-12-27_21.33.09.xml	7.42253e-15
288	diffusion	YAP_model_2021-12-27_22.13.50.xml	5.21031
289	diffusion_phosph	YAP_model_2021-12-27_22.13.50.xml	1.20571
290	phosphorylation	YAP_model_2021-12-27_22.13.50.xml	0.0422779
291	dephosporylation	YAP_model_2021-12-27_22.13.50.xml	0.128848
292	translation	YAP_model_2021-12-27_22.13.50.xml	0.00545756
293	degradation	YAP_model_2021-12-27_22.13.50.xml	0.00674265
294	import	YAP_model_2021-12-27_22.13.50.xml	8.8597e-15
295	export	YAP_model_2021-12-27_22.13.50.xml	3.74229e-16
296	diffusion	YAP_model_2021-12-27_22.27.58.xml	5.95104
297	diffusion_phosph	YAP_model_2021-12-27_22.27.58.xml	1.16781
298	phosphorylation	YAP_model_2021-12-27_22.27.58.xml	0.03097
299	dephosporylation	YAP_model_2021-12-27_22.27.58.xml	0.296681
300	translation	YAP_model_2021-12-27_22.27.58.xml	0.00814448
301	degradation	YAP_model_2021-12-27_22.27.58.xml	0.00779537
302	import	YAP_model_2021-12-27_22.27.58.xml	5.97712e-15
303	export	YAP_model_2021-12-27_22.27.58.xml	6.97258e-15
304	diffusion	YAP_model_2021-12-27_22.30.54.xml	5.30551
305	diffusion_phosph	YAP_model_2021-12-27_22.30.54.xml	1.02344
306	phosphorylation	YAP_model_2021-12-27_22.30.54.xml	0.0634118
307	dephosporylation	YAP_model_2021-12-27_22.30.54.xml	0.41374
308	translation	YAP_model_2021-12-27_22.30.54.xml	0.00888674
309	degradation	YAP_model_2021-12-27_22.30.54.xml	0.00891583
310	import	YAP_model_2021-12-27_22.30.54.xml	8.63706e-15
311	export	YAP_model_2021-12-27_22.30.54.xml	9.28113e-16
312	diffusion	YAP_model_2021-12-27_22.35.08.xml	9.448
313	diffusion_phosph	YAP_model_2021-12-27_22.35.08.xml	1.2856
314	phosphorylation	YAP_model_2021-12-27_22.35.08.xml	0.125895
315	dephosporylation	YAP_model_2021-12-27_22.35.08.xml	0.271377
316	translation	YAP_model_2021-12-27_22.35.08.xml	0.00362383
317	degradation	YAP_model_2021-12-27_22.35.08.xml	0.00908948
318	import	YAP_model_2021-12-27_22.35.08.xml	8.99431e-15
319	export	YAP_model_2021-12-27_22.35.08.xml	2.9739e-16
320	diffusion	YAP_model_2021-12-27_23.10.47.xml	4.29705
321	diffusion_phosph	YAP_model_2021-12-27_23.10.47.xml	1.03278
322	phosphorylation	YAP_model_2021-12-27_23.10.47.xml	0.0101545
323	dephosporylation	YAP_model_2021-12-27_23.10.47.xml	0.0111643
324	translation	YAP_model_2021-12-27_23.10.47.xml	0.007974
325	degradation	YAP_model_2021-12-27_23.10.47.xml	0.00636863
326	import	YAP_model_2021-12-27_23.10.47.xml	3.67308e-15
327	export	YAP_model_2021-12-27_23.10.47.xml	3.02584e-15
328	diffusion	YAP_model_2021-12-27_23.26.02.xml	5.63515
329	diffusion_phosph	YAP_model_2021-12-27_23.26.02.xml	1.09237
330	phosphorylation	YAP_model_2021-12-27_23.26.02.xml	0.413848
331	dephosporylation	YAP_model_2021-12-27_23.26.02.xml	0.356816
332	translation	YAP_model_2021-12-27_23.26.02.xml	0.00605806
333	degradation	YAP_model_2021-12-27_23.26.02.xml	0.00788664
334	import	YAP_model_2021-12-27_23.26.02.xml	8.67618e-15
335	export	YAP_model_2021-12-27_23.26.02.xml	1.0183e-16
336	diffusion	YAP_model_2021-12-27_23.29.30.xml	5.25352
337	diffusion_phosph	YAP_model_2021-12-27_23.29.30.xml	1.27484
338	phosphorylation	YAP_model_2021-12-27_23.29.30.xml	0.264041
339	dephosporylation	YAP_model_2021-12-27_23.29.30.xml	0.245723
340	translation	YAP_model_2021-12-27_23.29.30.xml	0.00650513
341	degradation	YAP_model_2021-12-27_23.29.30.xml	0.00860586
342	import	YAP_model_2021-12-27_23.29.30.xml	9.06976e-15
343	export	YAP_model_2021-12-27_23.29.30.xml	1.17018e-16
344	diffusion	YAP_model_2021-12-27_23.30.38.xml	5.59204
345	diffusion_phosph	YAP_model_2021-12-27_23.30.38.xml	1.22746
346	phosphorylation	YAP_model_2021-12-27_23.30.38.xml	0.0316908
347	dephosporylation	YAP_model_2021-12-27_23.30.38.xml	0.294646
348	translation	YAP_model_2021-12-27_23.30.38.xml	0.00515863
349	degradation	YAP_model_2021-12-27_23.30.38.xml	0.00783074
350	import	YAP_model_2021-12-27_23.30.38.xml	9.90101e-15
351	export	YAP_model_2021-12-27_23.30.38.xml	4.56029e-15
352	diffusion	YAP_model_2021-12-28_00.19.15.xml	4.27706
353	diffusion_phosph	YAP_model_2021-12-28_00.19.15.xml	1.05853
354	phosphorylation	YAP_model_2021-12-28_00.19.15.xml	0.0315026
355	dephosporylation	YAP_model_2021-12-28_00.19.15.xml	0.321628
356	translation	YAP_model_2021-12-28_00.19.15.xml	0.00320933
357	degradation	YAP_model_2021-12-28_00.19.15.xml	0.00814229
358	import	YAP_model_2021-12-28_00.19.15.xml	9.0763e-15
359	export	YAP_model_2021-12-28_00.19.15.xml	5.82816e-15
360	diffusion	YAP_model_2021-12-28_00.23.22.xml	8.27422
361	diffusion_phosph	YAP_model_2021-12-28_00.23.22.xml	1.14665
362	phosphorylation	YAP_model_2021-12-28_00.23.22.xml	0.0316379
363	dephosporylation	YAP_model_2021-12-28_00.23.22.xml	0.11756
364	translation	YAP_model_2021-12-28_00.23.22.xml	0.00164038
365	degradation	YAP_model_2021-12-28_00.23.22.xml	0.00833612
366	import	YAP_model_2021-12-28_00.23.22.xml	6.27779e-15
367	export	YAP_model_2021-12-28_00.23.22.xml	1.97588e-15
368	diffusion	YAP_model_2021-12-28_00.28.08.xml	5.43552
369	diffusion_phosph	YAP_model_2021-12-28_00.28.08.xml	1.08632
370	phosphorylation	YAP_model_2021-12-28_00.28.08.xml	0.0405009
371	dephosporylation	YAP_model_2021-12-28_00.28.08.xml	0.40087
372	translation	YAP_model_2021-12-28_00.28.08.xml	0.00195356
373	degradation	YAP_model_2021-12-28_00.28.08.xml	0.00926098
374	import	YAP_model_2021-12-28_00.28.08.xml	8.02992e-15
375	export	YAP_model_2021-12-28_00.28.08.xml	5.67064e-15
376	diffusion	YAP_model_2021-12-28_00.33.30.xml	6.76601
377	diffusion_phosph	YAP_model_2021-12-28_00.33.30.xml	1.28006
378	phosphorylation	YAP_model_2021-12-28_00.33.30.xml	0.338522
379	dephosporylation	YAP_model_2021-12-28_00.33.30.xml	0.187453
380	translation	YAP_model_2021-12-28_00.33.30.xml	0.00975033
381	degradation	YAP_model_2021-12-28_00.33.30.xml	0.00941314
382	import	YAP_model_2021-12-28_00.33.30.xml	8.44714e-15
383	export	YAP_model_2021-12-28_00.33.30.xml	1.16302e-16
384	diffusion	YAP_model_2021-12-28_01.30.26.xml	7.83908
385	diffusion_phosph	YAP_model_2021-12-28_01.30.26.xml	1.05221
386	phosphorylation	YAP_model_2021-12-28_01.30.26.xml	0.0698111
387	dephosporylation	YAP_model_2021-12-28_01.30.26.xml	0.449186
388	translation	YAP_model_2021-12-28_01.30.26.xml	0.00222677
389	degradation	YAP_model_2021-12-28_01.30.26.xml	0.00947492
390	import	YAP_model_2021-12-28_01.30.26.xml	8.68951e-15
391	export	YAP_model_2021-12-28_01.30.26.xml	1.64868e-15
392	diffusion	YAP_model_2021-12-28_01.34.35.xml	8.07696
393	diffusion_phosph	YAP_model_2021-12-28_01.34.35.xml	1.40106
394	phosphorylation	YAP_model_2021-12-28_01.34.35.xml	0.016961
395	dephosporylation	YAP_model_2021-12-28_01.34.35.xml	0.111646
396	translation	YAP_model_2021-12-28_01.34.35.xml	0.00438666
397	degradation	YAP_model_2021-12-28_01.34.35.xml	0.00619236
398	import	YAP_model_2021-12-28_01.34.35.xml	7.81911e-15
399	export	YAP_model_2021-12-28_01.34.35.xml	6.99023e-15
400	diffusion	YAP_model_2021-12-28_01.37.55.xml	7.32193
401	diffusion_phosph	YAP_model_2021-12-28_01.37.55.xml	1.20742
402	phosphorylation	YAP_model_2021-12-28_01.37.55.xml	0.027789
403	dephosporylation	YAP_model_2021-12-28_01.37.55.xml	0.286477
404	translation	YAP_model_2021-12-28_01.37.55.xml	0.00355921
405	degradation	YAP_model_2021-12-28_01.37.55.xml	0.00710899
406	import	YAP_model_2021-12-28_01.37.55.xml	9.09821e-15
407	export	YAP_model_2021-12-28_01.37.55.xml	8.62359e-15
408	diffusion	YAP_model_2021-12-28_01.41.19.xml	7.2527
409	diffusion_phosph	YAP_model_2021-12-28_01.41.19.xml	1.28566
410	phosphorylation	YAP_model_2021-12-28_01.41.19.xml	0.0255281
411	dephosporylation	YAP_model_2021-12-28_01.41.19.xml	0.203451
412	translation	YAP_model_2021-12-28_01.41.19.xml	0.00621241
413	degradation	YAP_model_2021-12-28_01.41.19.xml	0.00773436
414	import	YAP_model_2021-12-28_01.41.19.xml	5.86684e-15
415	export	YAP_model_2021-12-28_01.41.19.xml	7.46619e-15
416	diffusion	YAP_model_2021-12-28_02.39.23.xml	5.13641
417	diffusion_phosph	YAP_model_2021-12-28_02.39.23.xml	1.06092
418	phosphorylation	YAP_model_2021-12-28_02.39.23.xml	0.0363545
419	dephosporylation	YAP_model_2021-12-28_02.39.23.xml	0.285998
420	translation	YAP_model_2021-12-28_02.39.23.xml	0.00421054
421	degradation	YAP_model_2021-12-28_02.39.23.xml	0.00680003
422	import	YAP_model_2021-12-28_02.39.23.xml	9.96086e-15
423	export	YAP_model_2021-12-28_02.39.23.xml	1.30466e-15
424	diffusion	YAP_model_2021-12-28_02.40.32.xml	5.97977
425	diffusion_phosph	YAP_model_2021-12-28_02.40.32.xml	1.04081
426	phosphorylation	YAP_model_2021-12-28_02.40.32.xml	0.0295849
427	dephosporylation	YAP_model_2021-12-28_02.40.32.xml	0.2216
428	translation	YAP_model_2021-12-28_02.40.32.xml	0.00739373
429	degradation	YAP_model_2021-12-28_02.40.32.xml	0.00889182
430	import	YAP_model_2021-12-28_02.40.32.xml	9.6979e-15
431	export	YAP_model_2021-12-28_02.40.32.xml	9.05887e-15
432	diffusion	YAP_model_2021-12-28_02.43.29.xml	8.59458
433	diffusion_phosph	YAP_model_2021-12-28_02.43.29.xml	1.02098
434	phosphorylation	YAP_model_2021-12-28_02.43.29.xml	0.0389069
435	dephosporylation	YAP_model_2021-12-28_02.43.29.xml	0.288403
436	translation	YAP_model_2021-12-28_02.43.29.xml	0.00225306
437	degradation	YAP_model_2021-12-28_02.43.29.xml	0.00994073
438	import	YAP_model_2021-12-28_02.43.29.xml	1.8648e-15
439	export	YAP_model_2021-12-28_02.43.29.xml	8.60552e-15
440	diffusion	YAP_model_2021-12-28_02.44.19.xml	9.56909
441	diffusion_phosph	YAP_model_2021-12-28_02.44.19.xml	1.37194
442	phosphorylation	YAP_model_2021-12-28_02.44.19.xml	0.0427973
443	dephosporylation	YAP_model_2021-12-28_02.44.19.xml	0.349099
444	translation	YAP_model_2021-12-28_02.44.19.xml	0.00772114
445	degradation	YAP_model_2021-12-28_02.44.19.xml	0.00986444
446	import	YAP_model_2021-12-28_02.44.19.xml	1.65222e-15
447	export	YAP_model_2021-12-28_02.44.19.xml	3.20693e-15
448	diffusion	YAP_model_2021-12-28_03.41.41.xml	5.35958
449	diffusion_phosph	YAP_model_2021-12-28_03.41.41.xml	1.23968
450	phosphorylation	YAP_model_2021-12-28_03.41.41.xml	0.0853612
451	dephosporylation	YAP_model_2021-12-28_03.41.41.xml	0.283867
452	translation	YAP_model_2021-12-28_03.41.41.xml	0.00398063
453	degradation	YAP_model_2021-12-28_03.41.41.xml	0.00878241
454	import	YAP_model_2021-12-28_03.41.41.xml	7.38944e-15
455	export	YAP_model_2021-12-28_03.41.41.xml	3.64315e-16
456	diffusion	YAP_model_2021-12-28_03.44.06.xml	4.17001
457	diffusion_phosph	YAP_model_2021-12-28_03.44.06.xml	1.03228
458	phosphorylation	YAP_model_2021-12-28_03.44.06.xml	0.0337212
459	dephosporylation	YAP_model_2021-12-28_03.44.06.xml	0.48283
460	translation	YAP_model_2021-12-28_03.44.06.xml	0.00655683
461	degradation	YAP_model_2021-12-28_03.44.06.xml	0.00624441
462	import	YAP_model_2021-12-28_03.44.06.xml	9.37508e-15
463	export	YAP_model_2021-12-28_03.44.06.xml	2.71648e-15
464	diffusion	YAP_model_2021-12-28_03.47.30.xml	6.42521
465	diffusion_phosph	YAP_model_2021-12-28_03.47.30.xml	1.14053
466	phosphorylation	YAP_model_2021-12-28_03.47.30.xml	0.111289
467	dephosporylation	YAP_model_2021-12-28_03.47.30.xml	0.394851
468	translation	YAP_model_2021-12-28_03.47.30.xml	0.00992597
469	degradation	YAP_model_2021-12-28_03.47.30.xml	0.00875169
470	import	YAP_model_2021-12-28_03.47.30.xml	9.8132e-15
471	export	YAP_model_2021-12-28_03.47.30.xml	4.30293e-16
472	diffusion	YAP_model_2021-12-28_03.52.42.xml	5.82886
473	diffusion_phosph	YAP_model_2021-12-28_03.52.42.xml	1.1444
474	phosphorylation	YAP_model_2021-12-28_03.52.42.xml	0.0265762
475	dephosporylation	YAP_model_2021-12-28_03.52.42.xml	0.154499
476	translation	YAP_model_2021-12-28_03.52.42.xml	0.00695627
477	degradation	YAP_model_2021-12-28_03.52.42.xml	0.00778129
478	import	YAP_model_2021-12-28_03.52.42.xml	8.81567e-15
479	export	YAP_model_2021-12-28_03.52.42.xml	2.21313e-15
480	diffusion	YAP_model_2021-12-28_04.39.59.xml	3.69566
481	diffusion_phosph	YAP_model_2021-12-28_04.39.59.xml	1.05029
482	phosphorylation	YAP_model_2021-12-28_04.39.59.xml	0.105582
483	dephosporylation	YAP_model_2021-12-28_04.39.59.xml	0.259745
484	translation	YAP_model_2021-12-28_04.39.59.xml	0.00522631
485	degradation	YAP_model_2021-12-28_04.39.59.xml	0.0046659
486	import	YAP_model_2021-12-28_04.39.59.xml	8.2149e-15
487	export	YAP_model_2021-12-28_04.39.59.xml	1.31638e-16
488	diffusion	YAP_model_2021-12-28_04.40.17.xml	5.05734
489	diffusion_phosph	YAP_model_2021-12-28_04.40.17.xml	1.13307
490	phosphorylation	YAP_model_2021-12-28_04.40.17.xml	0.0253191
491	dephosporylation	YAP_model_2021-12-28_04.40.17.xml	0.223773
492	translation	YAP_model_2021-12-28_04.40.17.xml	0.00677776
493	degradation	YAP_model_2021-12-28_04.40.17.xml	0.00759936
494	import	YAP_model_2021-12-28_04.40.17.xml	9.55204e-15
495	export	YAP_model_2021-12-28_04.40.17.xml	8.51829e-15
496	diffusion	YAP_model_2021-12-28_04.50.53.xml	6.01084
497	diffusion_phosph	YAP_model_2021-12-28_04.50.53.xml	1.18803
498	phosphorylation	YAP_model_2021-12-28_04.50.53.xml	0.0302838
499	dephosporylation	YAP_model_2021-12-28_04.50.53.xml	0.222694
500	translation	YAP_model_2021-12-28_04.50.53.xml	0.00493684
501	degradation	YAP_model_2021-12-28_04.50.53.xml	0.00946615
502	import	YAP_model_2021-12-28_04.50.53.xml	7.50781e-15
503	export	YAP_model_2021-12-28_04.50.53.xml	7.70331e-15
504	diffusion	YAP_model_2021-12-28_05.04.54.xml	6.08061
505	diffusion_phosph	YAP_model_2021-12-28_05.04.54.xml	1.06563
506	phosphorylation	YAP_model_2021-12-28_05.04.54.xml	0.0251486
507	dephosporylation	YAP_model_2021-12-28_05.04.54.xml	0.292535
508	translation	YAP_model_2021-12-28_05.04.54.xml	0.00549841
509	degradation	YAP_model_2021-12-28_05.04.54.xml	0.00559628
510	import	YAP_model_2021-12-28_05.04.54.xml	9.69636e-15
511	export	YAP_model_2021-12-28_05.04.54.xml	6.73494e-15
512	diffusion	YAP_model_2021-12-28_05.30.39.xml	5.1529
513	diffusion_phosph	YAP_model_2021-12-28_05.30.39.xml	1.09604
514	phosphorylation	YAP_model_2021-12-28_05.30.39.xml	0.127786
515	dephosporylation	YAP_model_2021-12-28_05.30.39.xml	0.308462
516	translation	YAP_model_2021-12-28_05.30.39.xml	0.00520726
517	degradation	YAP_model_2021-12-28_05.30.39.xml	0.00664587
518	import	YAP_model_2021-12-28_05.30.39.xml	4.62028e-15
519	export	YAP_model_2021-12-28_05.30.39.xml	1.89691e-16
520	diffusion	YAP_model_2021-12-28_05.37.03.xml	5.1145
521	diffusion_phosph	YAP_model_2021-12-28_05.37.03.xml	1.01567
522	phosphorylation	YAP_model_2021-12-28_05.37.03.xml	0.0599431
523	dephosporylation	YAP_model_2021-12-28_05.37.03.xml	0.469841
524	translation	YAP_model_2021-12-28_05.37.03.xml	0.00661677
525	degradation	YAP_model_2021-12-28_05.37.03.xml	0.00734852
526	import	YAP_model_2021-12-28_05.37.03.xml	9.67665e-15
527	export	YAP_model_2021-12-28_05.37.03.xml	8.4349e-16
528	diffusion	YAP_model_2021-12-28_05.58.45.xml	4.61982
529	diffusion_phosph	YAP_model_2021-12-28_05.58.45.xml	1.18404
530	phosphorylation	YAP_model_2021-12-28_05.58.45.xml	0.0346121
531	dephosporylation	YAP_model_2021-12-28_05.58.45.xml	0.339
532	translation	YAP_model_2021-12-28_05.58.45.xml	0.00503665
533	degradation	YAP_model_2021-12-28_05.58.45.xml	0.00852934
534	import	YAP_model_2021-12-28_05.58.45.xml	9.52454e-15
535	export	YAP_model_2021-12-28_05.58.45.xml	3.19598e-15
536	diffusion	YAP_model_2021-12-28_05.58.52.xml	7.56552
537	diffusion_phosph	YAP_model_2021-12-28_05.58.52.xml	1.16268
538	phosphorylation	YAP_model_2021-12-28_05.58.52.xml	0.0245595
539	dephosporylation	YAP_model_2021-12-28_05.58.52.xml	0.221469
540	translation	YAP_model_2021-12-28_05.58.52.xml	0.00199965
541	degradation	YAP_model_2021-12-28_05.58.52.xml	0.00944587
542	import	YAP_model_2021-12-28_05.58.52.xml	8.73843e-16
543	export	YAP_model_2021-12-28_05.58.52.xml	7.27758e-15
544	diffusion	YAP_model_2021-12-28_06.31.41.xml	3.70003
545	diffusion_phosph	YAP_model_2021-12-28_06.31.41.xml	1.06249
546	phosphorylation	YAP_model_2021-12-28_06.31.41.xml	0.0180112
547	dephosporylation	YAP_model_2021-12-28_06.31.41.xml	0.151005
548	translation	YAP_model_2021-12-28_06.31.41.xml	0.00807223
549	degradation	YAP_model_2021-12-28_06.31.41.xml	0.00538996
550	import	YAP_model_2021-12-28_06.31.41.xml	7.12154e-15
551	export	YAP_model_2021-12-28_06.31.41.xml	5.17796e-15
552	diffusion	YAP_model_2021-12-28_06.31.51.xml	5.53276
553	diffusion_phosph	YAP_model_2021-12-28_06.31.51.xml	1.21382
554	phosphorylation	YAP_model_2021-12-28_06.31.51.xml	0.430061
555	dephosporylation	YAP_model_2021-12-28_06.31.51.xml	0.213409
556	translation	YAP_model_2021-12-28_06.31.51.xml	0.00454514
557	degradation	YAP_model_2021-12-28_06.31.51.xml	0.00960337
558	import	YAP_model_2021-12-28_06.31.51.xml	7.72914e-15
559	export	YAP_model_2021-12-28_06.31.51.xml	1.02196e-16
560	diffusion	YAP_model_2021-12-28_07.05.27.xml	7.71075
561	diffusion_phosph	YAP_model_2021-12-28_07.05.27.xml	1.28849
562	phosphorylation	YAP_model_2021-12-28_07.05.27.xml	0.0127777
563	dephosporylation	YAP_model_2021-12-28_07.05.27.xml	0.0375085
564	translation	YAP_model_2021-12-28_07.05.27.xml	0.00821678
565	degradation	YAP_model_2021-12-28_07.05.27.xml	0.0069812
566	import	YAP_model_2021-12-28_07.05.27.xml	9.30758e-15
567	export	YAP_model_2021-12-28_07.05.27.xml	7.7993e-15
568	diffusion	YAP_model_2021-12-28_07.11.42.xml	7.8108
569	diffusion_phosph	YAP_model_2021-12-28_07.11.42.xml	1.30411
570	phosphorylation	YAP_model_2021-12-28_07.11.42.xml	0.0246878
571	dephosporylation	YAP_model_2021-12-28_07.11.42.xml	0.142466
572	translation	YAP_model_2021-12-28_07.11.42.xml	0.00592541
573	degradation	YAP_model_2021-12-28_07.11.42.xml	0.00651891
574	import	YAP_model_2021-12-28_07.11.42.xml	6.4405e-15
575	export	YAP_model_2021-12-28_07.11.42.xml	3.75152e-15
576	diffusion	YAP_model_2021-12-28_07.34.44.xml	5.62744
577	diffusion_phosph	YAP_model_2021-12-28_07.34.44.xml	1.05993
578	phosphorylation	YAP_model_2021-12-28_07.34.44.xml	0.0557779
579	dephosporylation	YAP_model_2021-12-28_07.34.44.xml	0.241418
580	translation	YAP_model_2021-12-28_07.34.44.xml	0.00538578
581	degradation	YAP_model_2021-12-28_07.34.44.xml	0.00883112
582	import	YAP_model_2021-12-28_07.34.44.xml	9.80138e-15
583	export	YAP_model_2021-12-28_07.34.44.xml	6.1697e-16
584	diffusion	YAP_model_2021-12-28_07.36.10.xml	4.88315
585	diffusion_phosph	YAP_model_2021-12-28_07.36.10.xml	1.02795
586	phosphorylation	YAP_model_2021-12-28_07.36.10.xml	0.0233348
587	dephosporylation	YAP_model_2021-12-28_07.36.10.xml	0.201991
588	translation	YAP_model_2021-12-28_07.36.10.xml	0.00463016
589	degradation	YAP_model_2021-12-28_07.36.10.xml	0.00690334
590	import	YAP_model_2021-12-28_07.36.10.xml	9.2644e-15
591	export	YAP_model_2021-12-28_07.36.10.xml	8.37594e-15
592	diffusion	YAP_model_2021-12-28_07.55.05.xml	4.14195
593	diffusion_phosph	YAP_model_2021-12-28_07.55.05.xml	1.04664
594	phosphorylation	YAP_model_2021-12-28_07.55.05.xml	0.0273323
595	dephosporylation	YAP_model_2021-12-28_07.55.05.xml	0.496758
596	translation	YAP_model_2021-12-28_07.55.05.xml	0.00111396
597	degradation	YAP_model_2021-12-28_07.55.05.xml	0.00586382
598	import	YAP_model_2021-12-28_07.55.05.xml	8.80327e-15
599	export	YAP_model_2021-12-28_07.55.05.xml	7.51559e-15
600	diffusion	YAP_model_2021-12-28_08.23.46.xml	8.83144
601	diffusion_phosph	YAP_model_2021-12-28_08.23.46.xml	1.05232
602	phosphorylation	YAP_model_2021-12-28_08.23.46.xml	0.229825
603	dephosporylation	YAP_model_2021-12-28_08.23.46.xml	0.0181491
604	translation	YAP_model_2021-12-28_08.23.46.xml	0.00912816
605	degradation	YAP_model_2021-12-28_08.23.46.xml	0.00994795
606	import	YAP_model_2021-12-28_08.23.46.xml	9.59244e-15
607	export	YAP_model_2021-12-28_08.23.46.xml	1.13444e-16
608	diffusion	YAP_model_2021-12-28_08.41.13.xml	6.94234
609	diffusion_phosph	YAP_model_2021-12-28_08.41.13.xml	1.21923
610	phosphorylation	YAP_model_2021-12-28_08.41.13.xml	0.0319334
611	dephosporylation	YAP_model_2021-12-28_08.41.13.xml	0.152388
612	translation	YAP_model_2021-12-28_08.41.13.xml	0.00787127
613	degradation	YAP_model_2021-12-28_08.41.13.xml	0.00960066
614	import	YAP_model_2021-12-28_08.41.13.xml	8.15083e-15
615	export	YAP_model_2021-12-28_08.41.13.xml	2.50619e-15
616	diffusion	YAP_model_2021-12-28_08.45.30.xml	6.06079
617	diffusion_phosph	YAP_model_2021-12-28_08.45.30.xml	1.19704
618	phosphorylation	YAP_model_2021-12-28_08.45.30.xml	0.0586471
619	dephosporylation	YAP_model_2021-12-28_08.45.30.xml	0.195606
620	translation	YAP_model_2021-12-28_08.45.30.xml	0.00362202
621	degradation	YAP_model_2021-12-28_08.45.30.xml	0.00638976
622	import	YAP_model_2021-12-28_08.45.30.xml	7.7081e-15
623	export	YAP_model_2021-12-28_08.45.30.xml	2.82883e-16
624	diffusion	YAP_model_2021-12-28_09.01.41.xml	6.46093
625	diffusion_phosph	YAP_model_2021-12-28_09.01.41.xml	1.37126
626	phosphorylation	YAP_model_2021-12-28_09.01.41.xml	0.0336547
627	dephosporylation	YAP_model_2021-12-28_09.01.41.xml	0.312539
628	translation	YAP_model_2021-12-28_09.01.41.xml	0.00149774
629	degradation	YAP_model_2021-12-28_09.01.41.xml	0.00901299
630	import	YAP_model_2021-12-28_09.01.41.xml	9.3922e-15
631	export	YAP_model_2021-12-28_09.01.41.xml	7.48912e-15
632	diffusion	YAP_model_2021-12-28_09.10.12.xml	4.16444
633	diffusion_phosph	YAP_model_2021-12-28_09.10.12.xml	1.03627
634	phosphorylation	YAP_model_2021-12-28_09.10.12.xml	0.013922
635	dephosporylation	YAP_model_2021-12-28_09.10.12.xml	0.0175241
636	translation	YAP_model_2021-12-28_09.10.12.xml	0.00340993
637	degradation	YAP_model_2021-12-28_09.10.12.xml	0.00835863
638	import	YAP_model_2021-12-28_09.10.12.xml	8.96794e-15
639	export	YAP_model_2021-12-28_09.10.12.xml	5.54664e-15
640	diffusion	YAP_model_2021-12-28_09.50.11.xml	7.69305
641	diffusion_phosph	YAP_model_2021-12-28_09.50.11.xml	1.27453
642	phosphorylation	YAP_model_2021-12-28_09.50.11.xml	0.030991
643	dephosporylation	YAP_model_2021-12-28_09.50.11.xml	0.309139
644	translation	YAP_model_2021-12-28_09.50.11.xml	0.00597467
645	degradation	YAP_model_2021-12-28_09.50.11.xml	0.00738478
646	import	YAP_model_2021-12-28_09.50.11.xml	6.54277e-15
647	export	YAP_model_2021-12-28_09.50.11.xml	5.86945e-15
648	diffusion	YAP_model_2021-12-28_09.51.04.xml	6.13311
649	diffusion_phosph	YAP_model_2021-12-28_09.51.04.xml	1.10733
650	phosphorylation	YAP_model_2021-12-28_09.51.04.xml	0.0407164
651	dephosporylation	YAP_model_2021-12-28_09.51.04.xml	0.221416
652	translation	YAP_model_2021-12-28_09.51.04.xml	0.00242044
653	degradation	YAP_model_2021-12-28_09.51.04.xml	0.00819028
654	import	YAP_model_2021-12-28_09.51.04.xml	1.50064e-15
655	export	YAP_model_2021-12-28_09.51.04.xml	9.40577e-16
656	diffusion	YAP_model_2021-12-28_10.06.17.xml	5.21672
657	diffusion_phosph	YAP_model_2021-12-28_10.06.17.xml	1.2654
658	phosphorylation	YAP_model_2021-12-28_10.06.17.xml	0.010046
659	dephosporylation	YAP_model_2021-12-28_10.06.17.xml	0.0307286
660	translation	YAP_model_2021-12-28_10.06.17.xml	0.00535143
661	degradation	YAP_model_2021-12-28_10.06.17.xml	0.00482346
662	import	YAP_model_2021-12-28_10.06.17.xml	3.19465e-15
663	export	YAP_model_2021-12-28_10.06.17.xml	7.6306e-15
664	diffusion	YAP_model_2021-12-28_10.10.34.xml	7.52851
665	diffusion_phosph	YAP_model_2021-12-28_10.10.34.xml	1.29377
666	phosphorylation	YAP_model_2021-12-28_10.10.34.xml	0.0524239
667	dephosporylation	YAP_model_2021-12-28_10.10.34.xml	0.3013
668	translation	YAP_model_2021-12-28_10.10.34.xml	0.00817123
669	degradation	YAP_model_2021-12-28_10.10.34.xml	0.0076367
670	import	YAP_model_2021-12-28_10.10.34.xml	6.7125e-15
671	export	YAP_model_2021-12-28_10.10.34.xml	1.01292e-15
672	diffusion	YAP_model_2021-12-28_10.53.12.xml	4.80107
673	diffusion_phosph	YAP_model_2021-12-28_10.53.12.xml	1.2034
674	phosphorylation	YAP_model_2021-12-28_10.53.12.xml	0.0310188
675	dephosporylation	YAP_model_2021-12-28_10.53.12.xml	0.0978037
676	translation	YAP_model_2021-12-28_10.53.12.xml	0.00132222
677	degradation	YAP_model_2021-12-28_10.53.12.xml	0.0069158
678	import	YAP_model_2021-12-28_10.53.12.xml	9.18949e-15
679	export	YAP_model_2021-12-28_10.53.12.xml	4.11283e-16
680	diffusion	YAP_model_2021-12-28_11.00.35.xml	7.95089
681	diffusion_phosph	YAP_model_2021-12-28_11.00.35.xml	1.37226
682	phosphorylation	YAP_model_2021-12-28_11.00.35.xml	0.0261304
683	dephosporylation	YAP_model_2021-12-28_11.00.35.xml	0.156862
684	translation	YAP_model_2021-12-28_11.00.35.xml	0.00740373
685	degradation	YAP_model_2021-12-28_11.00.35.xml	0.00978564
686	import	YAP_model_2021-12-28_11.00.35.xml	6.51795e-15
687	export	YAP_model_2021-12-28_11.00.35.xml	9.90717e-15
688	diffusion	YAP_model_2021-12-28_11.07.52.xml	5.80867
689	diffusion_phosph	YAP_model_2021-12-28_11.07.52.xml	1.30772
690	phosphorylation	YAP_model_2021-12-28_11.07.52.xml	0.021955
691	dephosporylation	YAP_model_2021-12-28_11.07.52.xml	0.0746624
692	translation	YAP_model_2021-12-28_11.07.52.xml	0.00402076
693	degradation	YAP_model_2021-12-28_11.07.52.xml	0.00880494
694	import	YAP_model_2021-12-28_11.07.52.xml	8.64716e-15
695	export	YAP_model_2021-12-28_11.07.52.xml	4.21556e-15
696	diffusion	YAP_model_2021-12-28_11.20.00.xml	7.32842
697	diffusion_phosph	YAP_model_2021-12-28_11.20.00.xml	1.11289
698	phosphorylation	YAP_model_2021-12-28_11.20.00.xml	0.0181672
699	dephosporylation	YAP_model_2021-12-28_11.20.00.xml	0.0446391
700	translation	YAP_model_2021-12-28_11.20.00.xml	0.00420327
701	degradation	YAP_model_2021-12-28_11.20.00.xml	0.00927035
702	import	YAP_model_2021-12-28_11.20.00.xml	2.8579e-15
703	export	YAP_model_2021-12-28_11.20.00.xml	8.64943e-15
704	diffusion	YAP_model_2021-12-28_11.50.42.xml	8.72029
705	diffusion_phosph	YAP_model_2021-12-28_11.50.42.xml	1.17997
706	phosphorylation	YAP_model_2021-12-28_11.50.42.xml	0.326708
707	dephosporylation	YAP_model_2021-12-28_11.50.42.xml	0.415568
708	translation	YAP_model_2021-12-28_11.50.42.xml	0.00405473
709	degradation	YAP_model_2021-12-28_11.50.42.xml	0.0071059
710	import	YAP_model_2021-12-28_11.50.42.xml	8.62005e-15
711	export	YAP_model_2021-12-28_11.50.42.xml	1.17601e-16
712	diffusion	YAP_model_2021-12-28_12.02.09.xml	5.66229
713	diffusion_phosph	YAP_model_2021-12-28_12.02.09.xml	1.07173
714	phosphorylation	YAP_model_2021-12-28_12.02.09.xml	0.0410995
715	dephosporylation	YAP_model_2021-12-28_12.02.09.xml	0.329728
716	translation	YAP_model_2021-12-28_12.02.09.xml	0.00693287
717	degradation	YAP_model_2021-12-28_12.02.09.xml	0.00793121
718	import	YAP_model_2021-12-28_12.02.09.xml	9.90522e-15
719	export	YAP_model_2021-12-28_12.02.09.xml	2.40669e-15
720	diffusion	YAP_model_2021-12-28_12.06.43.xml	5.15796
721	diffusion_phosph	YAP_model_2021-12-28_12.06.43.xml	1.09767
722	phosphorylation	YAP_model_2021-12-28_12.06.43.xml	0.0357667
723	dephosporylation	YAP_model_2021-12-28_12.06.43.xml	0.236489
724	translation	YAP_model_2021-12-28_12.06.43.xml	0.00845379
725	degradation	YAP_model_2021-12-28_12.06.43.xml	0.0099551
726	import	YAP_model_2021-12-28_12.06.43.xml	6.02679e-15
727	export	YAP_model_2021-12-28_12.06.43.xml	3.16443e-15
728	diffusion	YAP_model_2021-12-28_12.18.17.xml	6.26964
729	diffusion_phosph	YAP_model_2021-12-28_12.18.17.xml	1.19192
730	phosphorylation	YAP_model_2021-12-28_12.18.17.xml	0.0247458
731	dephosporylation	YAP_model_2021-12-28_12.18.17.xml	0.171207
732	translation	YAP_model_2021-12-28_12.18.17.xml	0.00963515
733	degradation	YAP_model_2021-12-28_12.18.17.xml	0.00761362
734	import	YAP_model_2021-12-28_12.18.17.xml	9.02422e-15
735	export	YAP_model_2021-12-28_12.18.17.xml	9.10537e-15
736	diffusion	YAP_model_2021-12-28_12.56.32.xml	5.51798
737	diffusion_phosph	YAP_model_2021-12-28_12.56.32.xml	1.02795
738	phosphorylation	YAP_model_2021-12-28_12.56.32.xml	0.0430365
739	dephosporylation	YAP_model_2021-12-28_12.56.32.xml	0.462426
740	translation	YAP_model_2021-12-28_12.56.32.xml	0.00564703
741	degradation	YAP_model_2021-12-28_12.56.32.xml	0.00915006
742	import	YAP_model_2021-12-28_12.56.32.xml	7.4318e-15
743	export	YAP_model_2021-12-28_12.56.32.xml	5.62771e-15
744	diffusion	YAP_model_2021-12-28_12.59.13.xml	7.55705
745	diffusion_phosph	YAP_model_2021-12-28_12.59.13.xml	1.47527
746	phosphorylation	YAP_model_2021-12-28_12.59.13.xml	0.0144694
747	dephosporylation	YAP_model_2021-12-28_12.59.13.xml	0.0272554
748	translation	YAP_model_2021-12-28_12.59.13.xml	0.00439671
749	degradation	YAP_model_2021-12-28_12.59.13.xml	0.00768614
750	import	YAP_model_2021-12-28_12.59.13.xml	8.67831e-15
751	export	YAP_model_2021-12-28_12.59.13.xml	7.87424e-15
752	diffusion	YAP_model_2021-12-28_13.14.24.xml	6.90227
753	diffusion_phosph	YAP_model_2021-12-28_13.14.24.xml	1.12955
754	phosphorylation	YAP_model_2021-12-28_13.14.24.xml	0.0186802
755	dephosporylation	YAP_model_2021-12-28_13.14.24.xml	0.0859965
756	translation	YAP_model_2021-12-28_13.14.24.xml	0.00312127
757	degradation	YAP_model_2021-12-28_13.14.24.xml	0.00809953
758	import	YAP_model_2021-12-28_13.14.24.xml	6.55765e-15
759	export	YAP_model_2021-12-28_13.14.24.xml	6.22704e-15
760	diffusion	YAP_model_2021-12-28_13.24.44.xml	5.72062
761	diffusion_phosph	YAP_model_2021-12-28_13.24.44.xml	1.1295
762	phosphorylation	YAP_model_2021-12-28_13.24.44.xml	0.027745
763	dephosporylation	YAP_model_2021-12-28_13.24.44.xml	0.22123
764	translation	YAP_model_2021-12-28_13.24.44.xml	0.00685633
765	degradation	YAP_model_2021-12-28_13.24.44.xml	0.00634647
766	import	YAP_model_2021-12-28_13.24.44.xml	9.30154e-15
767	export	YAP_model_2021-12-28_13.24.44.xml	2.03948e-15
768	diffusion	YAP_model_2021-12-28_13.57.05.xml	4.2519
769	diffusion_phosph	YAP_model_2021-12-28_13.57.05.xml	1.09626
770	phosphorylation	YAP_model_2021-12-28_13.57.05.xml	0.0149387
771	dephosporylation	YAP_model_2021-12-28_13.57.05.xml	0.067853
772	translation	YAP_model_2021-12-28_13.57.05.xml	0.00666933
773	degradation	YAP_model_2021-12-28_13.57.05.xml	0.007642
774	import	YAP_model_2021-12-28_13.57.05.xml	9.15075e-15
775	export	YAP_model_2021-12-28_13.57.05.xml	8.86201e-15
776	diffusion	YAP_model_2021-12-28_14.01.50.xml	6.4506
777	diffusion_phosph	YAP_model_2021-12-28_14.01.50.xml	1.30226
778	phosphorylation	YAP_model_2021-12-28_14.01.50.xml	0.0485967
779	dephosporylation	YAP_model_2021-12-28_14.01.50.xml	0.284248
780	translation	YAP_model_2021-12-28_14.01.50.xml	0.00599009
781	degradation	YAP_model_2021-12-28_14.01.50.xml	0.00944067
782	import	YAP_model_2021-12-28_14.01.50.xml	8.95348e-15
783	export	YAP_model_2021-12-28_14.01.50.xml	1.41294e-15
784	diffusion	YAP_model_2021-12-28_14.16.36.xml	6.73525
785	diffusion_phosph	YAP_model_2021-12-28_14.16.36.xml	1.15882
786	phosphorylation	YAP_model_2021-12-28_14.16.36.xml	0.0336097
787	dephosporylation	YAP_model_2021-12-28_14.16.36.xml	0.292989
788	translation	YAP_model_2021-12-28_14.16.36.xml	0.00686882
789	degradation	YAP_model_2021-12-28_14.16.36.xml	0.0063383
790	import	YAP_model_2021-12-28_14.16.36.xml	9.52074e-15
791	export	YAP_model_2021-12-28_14.16.36.xml	2.14619e-15
792	diffusion	YAP_model_2021-12-28_14.31.39.xml	6.91618
793	diffusion_phosph	YAP_model_2021-12-28_14.31.39.xml	1.15443
794	phosphorylation	YAP_model_2021-12-28_14.31.39.xml	0.0259654
795	dephosporylation	YAP_model_2021-12-28_14.31.39.xml	0.160719
796	translation	YAP_model_2021-12-28_14.31.39.xml	0.00541664
797	degradation	YAP_model_2021-12-28_14.31.39.xml	0.00683879
798	import	YAP_model_2021-12-28_14.31.39.xml	9.75656e-15
799	export	YAP_model_2021-12-28_14.31.39.xml	3.30924e-15
800	diffusion	YAP_model_2021-12-28_14.54.44.xml	6.46562
801	diffusion_phosph	YAP_model_2021-12-28_14.54.44.xml	1.30912
802	phosphorylation	YAP_model_2021-12-28_14.54.44.xml	0.0251537
803	dephosporylation	YAP_model_2021-12-28_14.54.44.xml	0.257965
804	translation	YAP_model_2021-12-28_14.54.44.xml	0.00573563
805	degradation	YAP_model_2021-12-28_14.54.44.xml	0.00714699
806	import	YAP_model_2021-12-28_14.54.44.xml	2.93129e-15
807	export	YAP_model_2021-12-28_14.54.44.xml	8.66223e-15
808	diffusion	YAP_model_2021-12-28_15.03.54.xml	5.22479
809	diffusion_phosph	YAP_model_2021-12-28_15.03.54.xml	1.06652
810	phosphorylation	YAP_model_2021-12-28_15.03.54.xml	0.0237155
811	dephosporylation	YAP_model_2021-12-28_15.03.54.xml	0.172734
812	translation	YAP_model_2021-12-28_15.03.54.xml	0.00793021
813	degradation	YAP_model_2021-12-28_15.03.54.xml	0.00842891
814	import	YAP_model_2021-12-28_15.03.54.xml	3.10108e-15
815	export	YAP_model_2021-12-28_15.03.54.xml	6.19197e-15
816	diffusion	YAP_model_2021-12-28_15.11.25.xml	5.38058
817	diffusion_phosph	YAP_model_2021-12-28_15.11.25.xml	1.00635
818	phosphorylation	YAP_model_2021-12-28_15.11.25.xml	0.0246537
819	dephosporylation	YAP_model_2021-12-28_15.11.25.xml	0.079189
820	translation	YAP_model_2021-12-28_15.11.25.xml	0.00496954
821	degradation	YAP_model_2021-12-28_15.11.25.xml	0.00957543
822	import	YAP_model_2021-12-28_15.11.25.xml	9.32527e-15
823	export	YAP_model_2021-12-28_15.11.25.xml	8.20349e-15
824	diffusion	YAP_model_2021-12-28_15.17.23.xml	4.66974
825	diffusion_phosph	YAP_model_2021-12-28_15.17.23.xml	1.09345
826	phosphorylation	YAP_model_2021-12-28_15.17.23.xml	0.0230715
827	dephosporylation	YAP_model_2021-12-28_15.17.23.xml	0.131138
828	translation	YAP_model_2021-12-28_15.17.23.xml	0.00331287
829	degradation	YAP_model_2021-12-28_15.17.23.xml	0.00823304
830	import	YAP_model_2021-12-28_15.17.23.xml	7.97681e-15
831	export	YAP_model_2021-12-28_15.17.23.xml	7.50853e-15
832	diffusion	YAP_model_2021-12-28_15.21.43.xml	6.49368
833	diffusion_phosph	YAP_model_2021-12-28_15.21.43.xml	1.03383
834	phosphorylation	YAP_model_2021-12-28_15.21.43.xml	0.0562403
835	dephosporylation	YAP_model_2021-12-28_15.21.43.xml	0.25343
836	translation	YAP_model_2021-12-28_15.21.43.xml	0.00597314
837	degradation	YAP_model_2021-12-28_15.21.43.xml	0.00661169
838	import	YAP_model_2021-12-28_15.21.43.xml	7.28213e-15
839	export	YAP_model_2021-12-28_15.21.43.xml	3.75419e-16
840	diffusion	YAP_model_2021-12-28_15.25.42.xml	5.21051
841	diffusion_phosph	YAP_model_2021-12-28_15.25.42.xml	1.34075
842	phosphorylation	YAP_model_2021-12-28_15.25.42.xml	0.0197241
843	dephosporylation	YAP_model_2021-12-28_15.25.42.xml	0.0373859
844	translation	YAP_model_2021-12-28_15.25.42.xml	0.00643692
845	degradation	YAP_model_2021-12-28_15.25.42.xml	0.00824539
846	import	YAP_model_2021-12-28_15.25.42.xml	9.60021e-15
847	export	YAP_model_2021-12-28_15.25.42.xml	6.52702e-16
848	diffusion	YAP_model_2021-12-28_15.28.18.xml	7.81305
849	diffusion_phosph	YAP_model_2021-12-28_15.28.18.xml	1.08952
850	phosphorylation	YAP_model_2021-12-28_15.28.18.xml	0.103433
851	dephosporylation	YAP_model_2021-12-28_15.28.18.xml	0.245039
852	translation	YAP_model_2021-12-28_15.28.18.xml	0.00502454
853	degradation	YAP_model_2021-12-28_15.28.18.xml	0.00639499
854	import	YAP_model_2021-12-28_15.28.18.xml	2.02431e-15
855	export	YAP_model_2021-12-28_15.28.18.xml	1.96584e-16
856	diffusion	YAP_model_2021-12-28_15.52.03.xml	4.78904
857	diffusion_phosph	YAP_model_2021-12-28_15.52.03.xml	1.13242
858	phosphorylation	YAP_model_2021-12-28_15.52.03.xml	0.0250162
859	dephosporylation	YAP_model_2021-12-28_15.52.03.xml	0.232297
860	translation	YAP_model_2021-12-28_15.52.03.xml	0.00325413
861	degradation	YAP_model_2021-12-28_15.52.03.xml	0.00780789
862	import	YAP_model_2021-12-28_15.52.03.xml	8.15307e-15
863	export	YAP_model_2021-12-28_15.52.03.xml	7.44359e-15
864	diffusion	YAP_model_2021-12-28_16.08.53.xml	5.26674
865	diffusion_phosph	YAP_model_2021-12-28_16.08.53.xml	1.17703
866	phosphorylation	YAP_model_2021-12-28_16.08.53.xml	0.106674
867	dephosporylation	YAP_model_2021-12-28_16.08.53.xml	0.187753
868	translation	YAP_model_2021-12-28_16.08.53.xml	0.0051507
869	degradation	YAP_model_2021-12-28_16.08.53.xml	0.00795115
870	import	YAP_model_2021-12-28_16.08.53.xml	8.06994e-15
871	export	YAP_model_2021-12-28_16.08.53.xml	1.91703e-16
872	diffusion	YAP_model_2021-12-28_16.21.03.xml	5.08333
873	diffusion_phosph	YAP_model_2021-12-28_16.21.03.xml	1.33
874	phosphorylation	YAP_model_2021-12-28_16.21.03.xml	0.0254088
875	dephosporylation	YAP_model_2021-12-28_16.21.03.xml	0.325222
876	translation	YAP_model_2021-12-28_16.21.03.xml	0.00486441
877	degradation	YAP_model_2021-12-28_16.21.03.xml	0.00612474
878	import	YAP_model_2021-12-28_16.21.03.xml	8.78191e-15
879	export	YAP_model_2021-12-28_16.21.03.xml	5.96427e-15
880	diffusion	YAP_model_2021-12-28_16.23.57.xml	5.77627
881	diffusion_phosph	YAP_model_2021-12-28_16.23.57.xml	1.13991
882	phosphorylation	YAP_model_2021-12-28_16.23.57.xml	0.031794
883	dephosporylation	YAP_model_2021-12-28_16.23.57.xml	0.260044
884	translation	YAP_model_2021-12-28_16.23.57.xml	0.00249848
885	degradation	YAP_model_2021-12-28_16.23.57.xml	0.0091251
886	import	YAP_model_2021-12-28_16.23.57.xml	9.90909e-15
887	export	YAP_model_2021-12-28_16.23.57.xml	5.12786e-15
888	diffusion	YAP_model_2021-12-28_17.11.09.xml	5.42198
889	diffusion_phosph	YAP_model_2021-12-28_17.11.09.xml	1.02383
890	phosphorylation	YAP_model_2021-12-28_17.11.09.xml	0.0498666
891	dephosporylation	YAP_model_2021-12-28_17.11.09.xml	0.325019
892	translation	YAP_model_2021-12-28_17.11.09.xml	0.00452771
893	degradation	YAP_model_2021-12-28_17.11.09.xml	0.00770265
894	import	YAP_model_2021-12-28_17.11.09.xml	7.13699e-15
895	export	YAP_model_2021-12-28_17.11.09.xml	8.55701e-16
896	diffusion	YAP_model_2021-12-28_17.18.29.xml	7.33876
897	diffusion_phosph	YAP_model_2021-12-28_17.18.29.xml	1.11617
898	phosphorylation	YAP_model_2021-12-28_17.18.29.xml	0.0207664
899	dephosporylation	YAP_model_2021-12-28_17.18.29.xml	0.082658
900	translation	YAP_model_2021-12-28_17.18.29.xml	0.00450421
901	degradation	YAP_model_2021-12-28_17.18.29.xml	0.00734064
902	import	YAP_model_2021-12-28_17.18.29.xml	3.42778e-15
903	export	YAP_model_2021-12-28_17.18.29.xml	7.34437e-15
904	diffusion	YAP_model_2021-12-28_17.29.41.xml	5.72303
905	diffusion_phosph	YAP_model_2021-12-28_17.29.41.xml	1.02854
906	phosphorylation	YAP_model_2021-12-28_17.29.41.xml	0.089053
907	dephosporylation	YAP_model_2021-12-28_17.29.41.xml	0.326965
908	translation	YAP_model_2021-12-28_17.29.41.xml	0.00637912
909	degradation	YAP_model_2021-12-28_17.29.41.xml	0.00828105
910	import	YAP_model_2021-12-28_17.29.41.xml	8.257e-15
911	export	YAP_model_2021-12-28_17.29.41.xml	4.60529e-16
912	diffusion	YAP_model_2021-12-28_18.19.13.xml	4.64676
913	diffusion_phosph	YAP_model_2021-12-28_18.19.13.xml	1.05129
914	phosphorylation	YAP_model_2021-12-28_18.19.13.xml	0.0284677
915	dephosporylation	YAP_model_2021-12-28_18.19.13.xml	0.34306
916	translation	YAP_model_2021-12-28_18.19.13.xml	0.0076356
917	degradation	YAP_model_2021-12-28_18.19.13.xml	0.00729058
918	import	YAP_model_2021-12-28_18.19.13.xml	7.37762e-15
919	export	YAP_model_2021-12-28_18.19.13.xml	8.68313e-15
920	diffusion	YAP_model_2021-12-28_18.23.29.xml	7.93289
921	diffusion_phosph	YAP_model_2021-12-28_18.23.29.xml	1.09807
922	phosphorylation	YAP_model_2021-12-28_18.23.29.xml	0.0348774
923	dephosporylation	YAP_model_2021-12-28_18.23.29.xml	0.244128
924	translation	YAP_model_2021-12-28_18.23.29.xml	0.00301121
925	degradation	YAP_model_2021-12-28_18.23.29.xml	0.00866761
926	import	YAP_model_2021-12-28_18.23.29.xml	9.61544e-15
927	export	YAP_model_2021-12-28_18.23.29.xml	9.98706e-15
928	diffusion	YAP_model_2021-12-28_18.35.10.xml	5.24208
929	diffusion_phosph	YAP_model_2021-12-28_18.35.10.xml	1.20088
930	phosphorylation	YAP_model_2021-12-28_18.35.10.xml	0.0245365
931	dephosporylation	YAP_model_2021-12-28_18.35.10.xml	0.186443
932	translation	YAP_model_2021-12-28_18.35.10.xml	0.00261096
933	degradation	YAP_model_2021-12-28_18.35.10.xml	0.00806524
934	import	YAP_model_2021-12-28_18.35.10.xml	6.15542e-15
935	export	YAP_model_2021-12-28_18.35.10.xml	8.17014e-15
936	diffusion	YAP_model_2021-12-28_19.13.33.xml	5.4219
937	diffusion_phosph	YAP_model_2021-12-28_19.13.33.xml	1.16419
938	phosphorylation	YAP_model_2021-12-28_19.13.33.xml	0.027798
939	dephosporylation	YAP_model_2021-12-28_19.13.33.xml	0.0627372
940	translation	YAP_model_2021-12-28_19.13.33.xml	0.00299674
941	degradation	YAP_model_2021-12-28_19.13.33.xml	0.009556
942	import	YAP_model_2021-12-28_19.13.33.xml	8.79916e-15
943	export	YAP_model_2021-12-28_19.13.33.xml	1.50848e-15
944	diffusion	YAP_model_2021-12-28_19.24.15.xml	6.19714
945	diffusion_phosph	YAP_model_2021-12-28_19.24.15.xml	1.29702
946	phosphorylation	YAP_model_2021-12-28_19.24.15.xml	0.0188458
947	dephosporylation	YAP_model_2021-12-28_19.24.15.xml	0.165007
948	translation	YAP_model_2021-12-28_19.24.15.xml	0.00248423
949	degradation	YAP_model_2021-12-28_19.24.15.xml	0.00616836
950	import	YAP_model_2021-12-28_19.24.15.xml	8.10233e-15
951	export	YAP_model_2021-12-28_19.24.15.xml	9.33733e-15
952	diffusion	YAP_model_2021-12-28_19.48.00.xml	8.78668
953	diffusion_phosph	YAP_model_2021-12-28_19.48.00.xml	1.00121
954	phosphorylation	YAP_model_2021-12-28_19.48.00.xml	0.0433497
955	dephosporylation	YAP_model_2021-12-28_19.48.00.xml	0.460606
956	translation	YAP_model_2021-12-28_19.48.00.xml	0.00391842
957	degradation	YAP_model_2021-12-28_19.48.00.xml	0.0090374
958	import	YAP_model_2021-12-28_19.48.00.xml	3.00764e-15
959	export	YAP_model_2021-12-28_19.48.00.xml	9.00806e-15
960	diffusion	YAP_model_2021-12-28_20.17.09.xml	7.01932
961	diffusion_phosph	YAP_model_2021-12-28_20.17.09.xml	1.24803
962	phosphorylation	YAP_model_2021-12-28_20.17.09.xml	0.0278512
963	dephosporylation	YAP_model_2021-12-28_20.17.09.xml	0.0665441
964	translation	YAP_model_2021-12-28_20.17.09.xml	0.00118469
965	degradation	YAP_model_2021-12-28_20.17.09.xml	0.00980417
966	import	YAP_model_2021-12-28_20.17.09.xml	6.77618e-15
967	export	YAP_model_2021-12-28_20.17.09.xml	3.58721e-15
968	diffusion	YAP_model_2021-12-28_20.28.13.xml	5.45817
969	diffusion_phosph	YAP_model_2021-12-28_20.28.13.xml	1.05905
970	phosphorylation	YAP_model_2021-12-28_20.28.13.xml	0.0345745
971	dephosporylation	YAP_model_2021-12-28_20.28.13.xml	0.136766
972	translation	YAP_model_2021-12-28_20.28.13.xml	0.00547748
973	degradation	YAP_model_2021-12-28_20.28.13.xml	0.00534112
974	import	YAP_model_2021-12-28_20.28.13.xml	9.21004e-15
975	export	YAP_model_2021-12-28_20.28.13.xml	4.92307e-16
976	diffusion	YAP_model_2021-12-28_20.54.10.xml	9.48765
977	diffusion_phosph	YAP_model_2021-12-28_20.54.10.xml	1.19721
978	phosphorylation	YAP_model_2021-12-28_20.54.10.xml	0.028826
979	dephosporylation	YAP_model_2021-12-28_20.54.10.xml	0.0746787
980	translation	YAP_model_2021-12-28_20.54.10.xml	0.00344618
981	degradation	YAP_model_2021-12-28_20.54.10.xml	0.00797747
982	import	YAP_model_2021-12-28_20.54.10.xml	8.07945e-15
983	export	YAP_model_2021-12-28_20.54.10.xml	6.6048e-15
984	diffusion	YAP_model_2021-12-28_21.20.48.xml	5.35004
985	diffusion_phosph	YAP_model_2021-12-28_21.20.48.xml	1.08034
986	phosphorylation	YAP_model_2021-12-28_21.20.48.xml	0.0260823
987	dephosporylation	YAP_model_2021-12-28_21.20.48.xml	0.205043
988	translation	YAP_model_2021-12-28_21.20.48.xml	0.00616324
989	degradation	YAP_model_2021-12-28_21.20.48.xml	0.00588981
990	import	YAP_model_2021-12-28_21.20.48.xml	9.64862e-15
991	export	YAP_model_2021-12-28_21.20.48.xml	1.63952e-15
992	diffusion	YAP_model_2021-12-28_21.25.52.xml	7.7651
993	diffusion_phosph	YAP_model_2021-12-28_21.25.52.xml	1.40291
994	phosphorylation	YAP_model_2021-12-28_21.25.52.xml	0.0324473
995	dephosporylation	YAP_model_2021-12-28_21.25.52.xml	0.463773
996	translation	YAP_model_2021-12-28_21.25.52.xml	0.00813084
997	degradation	YAP_model_2021-12-28_21.25.52.xml	0.00640083
998	import	YAP_model_2021-12-28_21.25.52.xml	7.38813e-15
999	export	YAP_model_2021-12-28_21.25.52.xml	9.72815e-15
1000	diffusion	YAP_model_2021-12-28_21.59.59.xml	6.54993
1001	diffusion_phosph	YAP_model_2021-12-28_21.59.59.xml	1.22577
1002	phosphorylation	YAP_model_2021-12-28_21.59.59.xml	0.0230332
1003	dephosporylation	YAP_model_2021-12-28_21.59.59.xml	0.102683
1004	translation	YAP_model_2021-12-28_21.59.59.xml	0.00838351
1005	degradation	YAP_model_2021-12-28_21.59.59.xml	0.00782493
1006	import	YAP_model_2021-12-28_21.59.59.xml	7.38208e-15
1007	export	YAP_model_2021-12-28_21.59.59.xml	3.93589e-15
1008	diffusion	YAP_model_2021-12-28_22.26.17.xml	7.99846
1009	diffusion_phosph	YAP_model_2021-12-28_22.26.17.xml	1.2043
1010	phosphorylation	YAP_model_2021-12-28_22.26.17.xml	0.0256767
1011	dephosporylation	YAP_model_2021-12-28_22.26.17.xml	0.1401
1012	translation	YAP_model_2021-12-28_22.26.17.xml	0.00981658
1013	degradation	YAP_model_2021-12-28_22.26.17.xml	0.00768213
1014	import	YAP_model_2021-12-28_22.26.17.xml	7.28912e-15
1015	export	YAP_model_2021-12-28_22.26.17.xml	2.44758e-15
1016	diffusion	YAP_model_2021-12-28_22.31.05.xml	7.20656
1017	diffusion_phosph	YAP_model_2021-12-28_22.31.05.xml	1.16886
1018	phosphorylation	YAP_model_2021-12-28_22.31.05.xml	0.0312694
1019	dephosporylation	YAP_model_2021-12-28_22.31.05.xml	0.186296
1020	translation	YAP_model_2021-12-28_22.31.05.xml	0.00599443
1021	degradation	YAP_model_2021-12-28_22.31.05.xml	0.00883527
1022	import	YAP_model_2021-12-28_22.31.05.xml	3.95795e-15
1023	export	YAP_model_2021-12-28_22.31.05.xml	8.86992e-15
1024	diffusion	YAP_model_2021-12-28_23.01.36.xml	5.42683
1025	diffusion_phosph	YAP_model_2021-12-28_23.01.36.xml	1.17006
1026	phosphorylation	YAP_model_2021-12-28_23.01.36.xml	0.0167745
1027	dephosporylation	YAP_model_2021-12-28_23.01.36.xml	0.101932
1028	translation	YAP_model_2021-12-28_23.01.36.xml	0.00335518
1029	degradation	YAP_model_2021-12-28_23.01.36.xml	0.00610391
1030	import	YAP_model_2021-12-28_23.01.36.xml	3.61133e-15
1031	export	YAP_model_2021-12-28_23.01.36.xml	3.45384e-15
1032	diffusion	YAP_model_2021-12-28_23.33.13.xml	6.17726
1033	diffusion_phosph	YAP_model_2021-12-28_23.33.13.xml	1.07284
1034	phosphorylation	YAP_model_2021-12-28_23.33.13.xml	0.045334
1035	dephosporylation	YAP_model_2021-12-28_23.33.13.xml	0.303031
1036	translation	YAP_model_2021-12-28_23.33.13.xml	0.00578865
1037	degradation	YAP_model_2021-12-28_23.33.13.xml	0.00953899
1038	import	YAP_model_2021-12-28_23.33.13.xml	7.58811e-15
1039	export	YAP_model_2021-12-28_23.33.13.xml	1.62139e-15
1040	diffusion	YAP_model_2021-12-28_23.33.48.xml	7.00791
1041	diffusion_phosph	YAP_model_2021-12-28_23.33.48.xml	1.06894
1042	phosphorylation	YAP_model_2021-12-28_23.33.48.xml	0.118407
1043	dephosporylation	YAP_model_2021-12-28_23.33.48.xml	0.214738
1044	translation	YAP_model_2021-12-28_23.33.48.xml	0.00612628
1045	degradation	YAP_model_2021-12-28_23.33.48.xml	0.00631481
1046	import	YAP_model_2021-12-28_23.33.48.xml	9.49045e-15
1047	export	YAP_model_2021-12-28_23.33.48.xml	1.88029e-16
1048	diffusion	YAP_model_2021-12-28_23.49.56.xml	5.17255
1049	diffusion_phosph	YAP_model_2021-12-28_23.49.56.xml	1.04476
1050	phosphorylation	YAP_model_2021-12-28_23.49.56.xml	0.0284633
1051	dephosporylation	YAP_model_2021-12-28_23.49.56.xml	0.260064
1052	translation	YAP_model_2021-12-28_23.49.56.xml	0.00492439
1053	degradation	YAP_model_2021-12-28_23.49.56.xml	0.0088807
1054	import	YAP_model_2021-12-28_23.49.56.xml	9.40374e-15
1055	export	YAP_model_2021-12-28_23.49.56.xml	7.81646e-15
1056	diffusion	YAP_model_2021-12-29_00.37.46.xml	6.48282
1057	diffusion_phosph	YAP_model_2021-12-29_00.37.46.xml	1.32032
1058	phosphorylation	YAP_model_2021-12-29_00.37.46.xml	0.0263233
1059	dephosporylation	YAP_model_2021-12-29_00.37.46.xml	0.298473
1060	translation	YAP_model_2021-12-29_00.37.46.xml	0.00360807
1061	degradation	YAP_model_2021-12-29_00.37.46.xml	0.00824141
1062	import	YAP_model_2021-12-29_00.37.46.xml	1.15775e-15
1063	export	YAP_model_2021-12-29_00.37.46.xml	7.5427e-15
1064	diffusion	YAP_model_2021-12-29_00.40.53.xml	7.05979
1065	diffusion_phosph	YAP_model_2021-12-29_00.40.53.xml	1.09695
1066	phosphorylation	YAP_model_2021-12-29_00.40.53.xml	0.0278043
1067	dephosporylation	YAP_model_2021-12-29_00.40.53.xml	0.220068
1068	translation	YAP_model_2021-12-29_00.40.53.xml	0.00549297
1069	degradation	YAP_model_2021-12-29_00.40.53.xml	0.00615441
1070	import	YAP_model_2021-12-29_00.40.53.xml	6.82366e-15
1071	export	YAP_model_2021-12-29_00.40.53.xml	1.58048e-15
1072	diffusion	YAP_model_2021-12-29_00.57.57.xml	7.21961
1073	diffusion_phosph	YAP_model_2021-12-29_00.57.57.xml	1.04176
1074	phosphorylation	YAP_model_2021-12-29_00.57.57.xml	0.048337
1075	dephosporylation	YAP_model_2021-12-29_00.57.57.xml	0.483231
1076	translation	YAP_model_2021-12-29_00.57.57.xml	0.00744513
1077	degradation	YAP_model_2021-12-29_00.57.57.xml	0.00880389
1078	import	YAP_model_2021-12-29_00.57.57.xml	8.76082e-15
1079	export	YAP_model_2021-12-29_00.57.57.xml	5.11114e-15
1080	diffusion	YAP_model_2021-12-29_01.41.09.xml	5.75
1081	diffusion_phosph	YAP_model_2021-12-29_01.41.09.xml	1.11736
1082	phosphorylation	YAP_model_2021-12-29_01.41.09.xml	0.0479663
1083	dephosporylation	YAP_model_2021-12-29_01.41.09.xml	0.354307
1084	translation	YAP_model_2021-12-29_01.41.09.xml	0.00447469
1085	degradation	YAP_model_2021-12-29_01.41.09.xml	0.00724633
1086	import	YAP_model_2021-12-29_01.41.09.xml	3.19474e-15
1087	export	YAP_model_2021-12-29_01.41.09.xml	9.75024e-16
1088	diffusion	YAP_model_2021-12-29_01.53.17.xml	8.26973
1089	diffusion_phosph	YAP_model_2021-12-29_01.53.17.xml	1.31832
1090	phosphorylation	YAP_model_2021-12-29_01.53.17.xml	0.0369502
1091	dephosporylation	YAP_model_2021-12-29_01.53.17.xml	0.18188
1092	translation	YAP_model_2021-12-29_01.53.17.xml	0.00525938
1093	degradation	YAP_model_2021-12-29_01.53.17.xml	0.00790576
1094	import	YAP_model_2021-12-29_01.53.17.xml	7.93642e-15
1095	export	YAP_model_2021-12-29_01.53.17.xml	1.41612e-15
1096	diffusion	YAP_model_2021-12-29_02.01.41.xml	6.6362
1097	diffusion_phosph	YAP_model_2021-12-29_02.01.41.xml	1.39486
1098	phosphorylation	YAP_model_2021-12-29_02.01.41.xml	0.0448956
1099	dephosporylation	YAP_model_2021-12-29_02.01.41.xml	0.414072
1100	translation	YAP_model_2021-12-29_02.01.41.xml	0.00389715
1101	degradation	YAP_model_2021-12-29_02.01.41.xml	0.00785921
1102	import	YAP_model_2021-12-29_02.01.41.xml	9.75666e-15
1103	export	YAP_model_2021-12-29_02.01.41.xml	1.92169e-15
1104	diffusion	YAP_model_2021-12-29_02.45.04.xml	6.18418
1105	diffusion_phosph	YAP_model_2021-12-29_02.45.04.xml	1.064
1106	phosphorylation	YAP_model_2021-12-29_02.45.04.xml	0.02894
1107	dephosporylation	YAP_model_2021-12-29_02.45.04.xml	0.153198
1108	translation	YAP_model_2021-12-29_02.45.04.xml	0.00375096
1109	degradation	YAP_model_2021-12-29_02.45.04.xml	0.00895253
1110	import	YAP_model_2021-12-29_02.45.04.xml	6.71467e-15
1111	export	YAP_model_2021-12-29_02.45.04.xml	1.85042e-15
1112	diffusion	YAP_model_2021-12-29_02.57.06.xml	5.80732
1113	diffusion_phosph	YAP_model_2021-12-29_02.57.06.xml	1.10315
1114	phosphorylation	YAP_model_2021-12-29_02.57.06.xml	0.0387243
1115	dephosporylation	YAP_model_2021-12-29_02.57.06.xml	0.322557
1116	translation	YAP_model_2021-12-29_02.57.06.xml	0.00214603
1117	degradation	YAP_model_2021-12-29_02.57.06.xml	0.00976582
1118	import	YAP_model_2021-12-29_02.57.06.xml	8.16062e-15
1119	export	YAP_model_2021-12-29_02.57.06.xml	5.66458e-15
1120	diffusion	YAP_model_2021-12-29_02.58.02.xml	5.63714
1121	diffusion_phosph	YAP_model_2021-12-29_02.58.02.xml	1.23566
1122	phosphorylation	YAP_model_2021-12-29_02.58.02.xml	0.0303281
1123	dephosporylation	YAP_model_2021-12-29_02.58.02.xml	0.421094
1124	translation	YAP_model_2021-12-29_02.58.02.xml	0.00549116
1125	degradation	YAP_model_2021-12-29_02.58.02.xml	0.00779958
1126	import	YAP_model_2021-12-29_02.58.02.xml	2.66884e-15
1127	export	YAP_model_2021-12-29_02.58.02.xml	7.50302e-15
1128	diffusion	YAP_model_2021-12-29_03.49.08.xml	4.4791
1129	diffusion_phosph	YAP_model_2021-12-29_03.49.08.xml	1.00097
1130	phosphorylation	YAP_model_2021-12-29_03.49.08.xml	0.01401
1131	dephosporylation	YAP_model_2021-12-29_03.49.08.xml	0.0238701
1132	translation	YAP_model_2021-12-29_03.49.08.xml	0.00862094
1133	degradation	YAP_model_2021-12-29_03.49.08.xml	0.00842253
1134	import	YAP_model_2021-12-29_03.49.08.xml	9.65244e-15
1135	export	YAP_model_2021-12-29_03.49.08.xml	8.99759e-15
1136	diffusion	YAP_model_2021-12-29_03.51.40.xml	7.52255
1137	diffusion_phosph	YAP_model_2021-12-29_03.51.40.xml	1.34835
1138	phosphorylation	YAP_model_2021-12-29_03.51.40.xml	0.0606263
1139	dephosporylation	YAP_model_2021-12-29_03.51.40.xml	0.397937
1140	translation	YAP_model_2021-12-29_03.51.40.xml	0.00257445
1141	degradation	YAP_model_2021-12-29_03.51.40.xml	0.00991355
1142	import	YAP_model_2021-12-29_03.51.40.xml	8.38968e-15
1143	export	YAP_model_2021-12-29_03.51.40.xml	1.13154e-15
1144	diffusion	YAP_model_2021-12-29_04.00.16.xml	5.09989
1145	diffusion_phosph	YAP_model_2021-12-29_04.00.16.xml	1.2188
1146	phosphorylation	YAP_model_2021-12-29_04.00.16.xml	0.0290641
1147	dephosporylation	YAP_model_2021-12-29_04.00.16.xml	0.247715
1148	translation	YAP_model_2021-12-29_04.00.16.xml	0.00415417
1149	degradation	YAP_model_2021-12-29_04.00.16.xml	0.00800563
1150	import	YAP_model_2021-12-29_04.00.16.xml	6.62575e-15
1151	export	YAP_model_2021-12-29_04.00.16.xml	3.09944e-15
1152	diffusion	YAP_model_2021-12-29_04.41.49.xml	5.16884
1153	diffusion_phosph	YAP_model_2021-12-29_04.41.49.xml	1.12725
1154	phosphorylation	YAP_model_2021-12-29_04.41.49.xml	0.0164421
1155	dephosporylation	YAP_model_2021-12-29_04.41.49.xml	0.0529828
1156	translation	YAP_model_2021-12-29_04.41.49.xml	0.00915887
1157	degradation	YAP_model_2021-12-29_04.41.49.xml	0.00661602
1158	import	YAP_model_2021-12-29_04.41.49.xml	7.42935e-15
1159	export	YAP_model_2021-12-29_04.41.49.xml	8.11545e-15
1160	diffusion	YAP_model_2021-12-29_04.49.53.xml	5.69052
1161	diffusion_phosph	YAP_model_2021-12-29_04.49.53.xml	1.26444
1162	phosphorylation	YAP_model_2021-12-29_04.49.53.xml	0.015847
1163	dephosporylation	YAP_model_2021-12-29_04.49.53.xml	0.0410802
1164	translation	YAP_model_2021-12-29_04.49.53.xml	0.00963655
1165	degradation	YAP_model_2021-12-29_04.49.53.xml	0.00699606
1166	import	YAP_model_2021-12-29_04.49.53.xml	8.72725e-15
1167	export	YAP_model_2021-12-29_04.49.53.xml	5.09826e-15
1168	diffusion	YAP_model_2021-12-29_05.02.39.xml	5.11358
1169	diffusion_phosph	YAP_model_2021-12-29_05.02.39.xml	1.14337
1170	phosphorylation	YAP_model_2021-12-29_05.02.39.xml	0.0330746
1171	dephosporylation	YAP_model_2021-12-29_05.02.39.xml	0.31547
1172	translation	YAP_model_2021-12-29_05.02.39.xml	0.0011418
1173	degradation	YAP_model_2021-12-29_05.02.39.xml	0.00785066
1174	import	YAP_model_2021-12-29_05.02.39.xml	9.90486e-15
1175	export	YAP_model_2021-12-29_05.02.39.xml	4.95569e-15
1176	diffusion	YAP_model_2021-12-29_05.45.58.xml	5.06849
1177	diffusion_phosph	YAP_model_2021-12-29_05.45.58.xml	1.17858
1178	phosphorylation	YAP_model_2021-12-29_05.45.58.xml	0.0171294
1179	dephosporylation	YAP_model_2021-12-29_05.45.58.xml	0.0202821
1180	translation	YAP_model_2021-12-29_05.45.58.xml	0.00486443
1181	degradation	YAP_model_2021-12-29_05.45.58.xml	0.00697987
1182	import	YAP_model_2021-12-29_05.45.58.xml	7.41337e-15
1183	export	YAP_model_2021-12-29_05.45.58.xml	2.97806e-16
1184	diffusion	YAP_model_2021-12-29_05.59.31.xml	6.78448
1185	diffusion_phosph	YAP_model_2021-12-29_05.59.31.xml	1.2711
1186	phosphorylation	YAP_model_2021-12-29_05.59.31.xml	0.0298708
1187	dephosporylation	YAP_model_2021-12-29_05.59.31.xml	0.256201
1188	translation	YAP_model_2021-12-29_05.59.31.xml	0.00272173
1189	degradation	YAP_model_2021-12-29_05.59.31.xml	0.00821938
1190	import	YAP_model_2021-12-29_05.59.31.xml	5.62641e-15
1191	export	YAP_model_2021-12-29_05.59.31.xml	7.51272e-15
1192	diffusion	YAP_model_2021-12-29_06.16.15.xml	9.2486
1193	diffusion_phosph	YAP_model_2021-12-29_06.16.15.xml	1.40924
1194	phosphorylation	YAP_model_2021-12-29_06.16.15.xml	0.19579
1195	dephosporylation	YAP_model_2021-12-29_06.16.15.xml	0.49283
1196	translation	YAP_model_2021-12-29_06.16.15.xml	0.0083397
1197	degradation	YAP_model_2021-12-29_06.16.15.xml	0.00982996
1198	import	YAP_model_2021-12-29_06.16.15.xml	5.10592e-15
1199	export	YAP_model_2021-12-29_06.16.15.xml	2.77483e-16
1200	diffusion	YAP_model_2021-12-29_06.47.42.xml	6.21754
1201	diffusion_phosph	YAP_model_2021-12-29_06.47.42.xml	1.1824
1202	phosphorylation	YAP_model_2021-12-29_06.47.42.xml	0.0274431
1203	dephosporylation	YAP_model_2021-12-29_06.47.42.xml	0.16018
1204	translation	YAP_model_2021-12-29_06.47.42.xml	0.00356541
1205	degradation	YAP_model_2021-12-29_06.47.42.xml	0.00883529
1206	import	YAP_model_2021-12-29_06.47.42.xml	9.44237e-15
1207	export	YAP_model_2021-12-29_06.47.42.xml	7.4018e-15
1208	diffusion	YAP_model_2021-12-29_07.00.34.xml	5.0893
1209	diffusion_phosph	YAP_model_2021-12-29_07.00.34.xml	1.02699
1210	phosphorylation	YAP_model_2021-12-29_07.00.34.xml	0.0433404
1211	dephosporylation	YAP_model_2021-12-29_07.00.34.xml	0.441735
1212	translation	YAP_model_2021-12-29_07.00.34.xml	0.00195231
1213	degradation	YAP_model_2021-12-29_07.00.34.xml	0.00804063
1214	import	YAP_model_2021-12-29_07.00.34.xml	8.86958e-15
1215	export	YAP_model_2021-12-29_07.00.34.xml	1.64481e-15
1216	diffusion	YAP_model_2021-12-29_07.24.53.xml	5.84187
1217	diffusion_phosph	YAP_model_2021-12-29_07.24.53.xml	1.29109
1218	phosphorylation	YAP_model_2021-12-29_07.24.53.xml	0.023254
1219	dephosporylation	YAP_model_2021-12-29_07.24.53.xml	0.102788
1220	translation	YAP_model_2021-12-29_07.24.53.xml	0.00515744
1221	degradation	YAP_model_2021-12-29_07.24.53.xml	0.0083707
1222	import	YAP_model_2021-12-29_07.24.53.xml	9.39486e-15
1223	export	YAP_model_2021-12-29_07.24.53.xml	9.31827e-15
1224	diffusion	YAP_model_2021-12-29_07.45.21.xml	5.3761
1225	diffusion_phosph	YAP_model_2021-12-29_07.45.21.xml	1.05246
1226	phosphorylation	YAP_model_2021-12-29_07.45.21.xml	0.023625
1227	dephosporylation	YAP_model_2021-12-29_07.45.21.xml	0.12936
1228	translation	YAP_model_2021-12-29_07.45.21.xml	0.00396004
1229	degradation	YAP_model_2021-12-29_07.45.21.xml	0.00838824
1230	import	YAP_model_2021-12-29_07.45.21.xml	9.32681e-15
1231	export	YAP_model_2021-12-29_07.45.21.xml	7.21098e-15
1232	diffusion	YAP_model_2021-12-29_07.54.10.xml	5.95243
1233	diffusion_phosph	YAP_model_2021-12-29_07.54.10.xml	1.0315
1234	phosphorylation	YAP_model_2021-12-29_07.54.10.xml	0.0321512
1235	dephosporylation	YAP_model_2021-12-29_07.54.10.xml	0.391592
1236	translation	YAP_model_2021-12-29_07.54.10.xml	0.00732713
1237	degradation	YAP_model_2021-12-29_07.54.10.xml	0.00658341
1238	import	YAP_model_2021-12-29_07.54.10.xml	9.60281e-15
1239	export	YAP_model_2021-12-29_07.54.10.xml	5.53931e-15
1240	diffusion	YAP_model_2021-12-29_08.26.44.xml	4.38111
1241	diffusion_phosph	YAP_model_2021-12-29_08.26.44.xml	1.2556
1242	phosphorylation	YAP_model_2021-12-29_08.26.44.xml	0.0144956
1243	dephosporylation	YAP_model_2021-12-29_08.26.44.xml	0.024865
1244	translation	YAP_model_2021-12-29_08.26.44.xml	0.00904549
1245	degradation	YAP_model_2021-12-29_08.26.44.xml	0.00900222
1246	import	YAP_model_2021-12-29_08.26.44.xml	8.25991e-15
1247	export	YAP_model_2021-12-29_08.26.44.xml	8.41523e-15
1248	diffusion	YAP_model_2021-12-29_08.43.32.xml	4.40444
1249	diffusion_phosph	YAP_model_2021-12-29_08.43.32.xml	1.12364
1250	phosphorylation	YAP_model_2021-12-29_08.43.32.xml	0.0301567
1251	dephosporylation	YAP_model_2021-12-29_08.43.32.xml	0.464626
1252	translation	YAP_model_2021-12-29_08.43.32.xml	0.00504473
1253	degradation	YAP_model_2021-12-29_08.43.32.xml	0.00705583
1254	import	YAP_model_2021-12-29_08.43.32.xml	9.62685e-15
1255	export	YAP_model_2021-12-29_08.43.32.xml	9.75928e-15
1256	diffusion	YAP_model_2021-12-29_09.00.53.xml	6.67211
1257	diffusion_phosph	YAP_model_2021-12-29_09.00.53.xml	1.25086
1258	phosphorylation	YAP_model_2021-12-29_09.00.53.xml	0.0392524
1259	dephosporylation	YAP_model_2021-12-29_09.00.53.xml	0.294256
1260	translation	YAP_model_2021-12-29_09.00.53.xml	0.0049623
1261	degradation	YAP_model_2021-12-29_09.00.53.xml	0.00970579
1262	import	YAP_model_2021-12-29_09.00.53.xml	9.88411e-15
1263	export	YAP_model_2021-12-29_09.00.53.xml	4.52213e-15
1264	diffusion	YAP_model_2021-12-29_09.28.01.xml	6.32701
1265	diffusion_phosph	YAP_model_2021-12-29_09.28.01.xml	1.17045
1266	phosphorylation	YAP_model_2021-12-29_09.28.01.xml	0.0223964
1267	dephosporylation	YAP_model_2021-12-29_09.28.01.xml	0.0737961
1268	translation	YAP_model_2021-12-29_09.28.01.xml	0.00360179
1269	degradation	YAP_model_2021-12-29_09.28.01.xml	0.00785322
1270	import	YAP_model_2021-12-29_09.28.01.xml	7.2348e-15
1271	export	YAP_model_2021-12-29_09.28.01.xml	2.689e-15
1272	diffusion	YAP_model_2021-12-29_09.55.52.xml	8.7299
1273	diffusion_phosph	YAP_model_2021-12-29_09.55.52.xml	1.20425
1274	phosphorylation	YAP_model_2021-12-29_09.55.52.xml	0.0752753
1275	dephosporylation	YAP_model_2021-12-29_09.55.52.xml	0.340167
1276	translation	YAP_model_2021-12-29_09.55.52.xml	0.0037792
1277	degradation	YAP_model_2021-12-29_09.55.52.xml	0.00685562
1278	import	YAP_model_2021-12-29_09.55.52.xml	8.22736e-15
1279	export	YAP_model_2021-12-29_09.55.52.xml	4.58026e-16
1280	diffusion	YAP_model_2021-12-29_10.01.07.xml	4.68424
1281	diffusion_phosph	YAP_model_2021-12-29_10.01.07.xml	1.10691
1282	phosphorylation	YAP_model_2021-12-29_10.01.07.xml	0.0233085
1283	dephosporylation	YAP_model_2021-12-29_10.01.07.xml	0.189026
1284	translation	YAP_model_2021-12-29_10.01.07.xml	0.00534876
1285	degradation	YAP_model_2021-12-29_10.01.07.xml	0.00578481
1286	import	YAP_model_2021-12-29_10.01.07.xml	9.8322e-15
1287	export	YAP_model_2021-12-29_10.01.07.xml	2.11706e-15
1288	diffusion	YAP_model_2021-12-29_10.42.46.xml	7.42923
1289	diffusion_phosph	YAP_model_2021-12-29_10.42.46.xml	1.40458
1290	phosphorylation	YAP_model_2021-12-29_10.42.46.xml	0.0126849
1291	dephosporylation	YAP_model_2021-12-29_10.42.46.xml	0.0184027
1292	translation	YAP_model_2021-12-29_10.42.46.xml	0.00515603
1293	degradation	YAP_model_2021-12-29_10.42.46.xml	0.00603437
1294	import	YAP_model_2021-12-29_10.42.46.xml	9.01654e-15
1295	export	YAP_model_2021-12-29_10.42.46.xml	8.50944e-15
1296	diffusion	YAP_model_2021-12-29_10.49.57.xml	4.53637
1297	diffusion_phosph	YAP_model_2021-12-29_10.49.57.xml	1.05511
1298	phosphorylation	YAP_model_2021-12-29_10.49.57.xml	0.0332967
1299	dephosporylation	YAP_model_2021-12-29_10.49.57.xml	0.122384
1300	translation	YAP_model_2021-12-29_10.49.57.xml	0.0049322
1301	degradation	YAP_model_2021-12-29_10.49.57.xml	0.00636055
1302	import	YAP_model_2021-12-29_10.49.57.xml	8.20674e-15
1303	export	YAP_model_2021-12-29_10.49.57.xml	4.00546e-16
1304	diffusion	YAP_model_2021-12-29_11.04.30.xml	5.3503
1305	diffusion_phosph	YAP_model_2021-12-29_11.04.30.xml	1.161
1306	phosphorylation	YAP_model_2021-12-29_11.04.30.xml	0.0375118
1307	dephosporylation	YAP_model_2021-12-29_11.04.30.xml	0.181786
1308	translation	YAP_model_2021-12-29_11.04.30.xml	0.00423064
1309	degradation	YAP_model_2021-12-29_11.04.30.xml	0.00625968
1310	import	YAP_model_2021-12-29_11.04.30.xml	9.22865e-15
1311	export	YAP_model_2021-12-29_11.04.30.xml	4.69723e-16
1312	diffusion	YAP_model_2021-12-29_11.51.16.xml	5.73046
1313	diffusion_phosph	YAP_model_2021-12-29_11.51.16.xml	1.17544
1314	phosphorylation	YAP_model_2021-12-29_11.51.16.xml	0.0399488
1315	dephosporylation	YAP_model_2021-12-29_11.51.16.xml	0.134476
1316	translation	YAP_model_2021-12-29_11.51.16.xml	0.00358886
1317	degradation	YAP_model_2021-12-29_11.51.16.xml	0.00695659
1318	import	YAP_model_2021-12-29_11.51.16.xml	9.72489e-15
1319	export	YAP_model_2021-12-29_11.51.16.xml	4.89569e-16
1320	diffusion	YAP_model_2021-12-29_11.56.36.xml	5.6955
1321	diffusion_phosph	YAP_model_2021-12-29_11.56.36.xml	1.281
1322	phosphorylation	YAP_model_2021-12-29_11.56.36.xml	0.0268238
1323	dephosporylation	YAP_model_2021-12-29_11.56.36.xml	0.310812
1324	translation	YAP_model_2021-12-29_11.56.36.xml	0.00622687
1325	degradation	YAP_model_2021-12-29_11.56.36.xml	0.00713295
1326	import	YAP_model_2021-12-29_11.56.36.xml	7.16934e-15
1327	export	YAP_model_2021-12-29_11.56.36.xml	9.62731e-15
1328	diffusion	YAP_model_2021-12-29_12.15.32.xml	4.93285
1329	diffusion_phosph	YAP_model_2021-12-29_12.15.32.xml	1.09687
1330	phosphorylation	YAP_model_2021-12-29_12.15.32.xml	0.0279911
1331	dephosporylation	YAP_model_2021-12-29_12.15.32.xml	0.237098
1332	translation	YAP_model_2021-12-29_12.15.32.xml	0.00582882
1333	degradation	YAP_model_2021-12-29_12.15.32.xml	0.0085209
1334	import	YAP_model_2021-12-29_12.15.32.xml	9.92154e-15
1335	export	YAP_model_2021-12-29_12.15.32.xml	3.25444e-15
1336	diffusion	YAP_model_2021-12-29_12.39.42.xml	4.12205
1337	diffusion_phosph	YAP_model_2021-12-29_12.39.42.xml	1.00108
1338	phosphorylation	YAP_model_2021-12-29_12.39.42.xml	0.0347133
1339	dephosporylation	YAP_model_2021-12-29_12.39.42.xml	0.28841
1340	translation	YAP_model_2021-12-29_12.39.42.xml	0.00269812
1341	degradation	YAP_model_2021-12-29_12.39.42.xml	0.00935688
1342	import	YAP_model_2021-12-29_12.39.42.xml	9.00807e-15
1343	export	YAP_model_2021-12-29_12.39.42.xml	2.65644e-15
1344	diffusion	YAP_model_2021-12-29_13.12.08.xml	8.10753
1345	diffusion_phosph	YAP_model_2021-12-29_13.12.08.xml	1.21132
1346	phosphorylation	YAP_model_2021-12-29_13.12.08.xml	0.031927
1347	dephosporylation	YAP_model_2021-12-29_13.12.08.xml	0.110963
1348	translation	YAP_model_2021-12-29_13.12.08.xml	0.00638378
1349	degradation	YAP_model_2021-12-29_13.12.08.xml	0.00877637
1350	import	YAP_model_2021-12-29_13.12.08.xml	8.16161e-15
1351	export	YAP_model_2021-12-29_13.12.08.xml	1.521e-15
1352	diffusion	YAP_model_2021-12-29_13.15.08.xml	5.50384
1353	diffusion_phosph	YAP_model_2021-12-29_13.15.08.xml	1.39306
1354	phosphorylation	YAP_model_2021-12-29_13.15.08.xml	0.0161849
1355	dephosporylation	YAP_model_2021-12-29_13.15.08.xml	0.0152675
1356	translation	YAP_model_2021-12-29_13.15.08.xml	0.00391082
1357	degradation	YAP_model_2021-12-29_13.15.08.xml	0.00877633
1358	import	YAP_model_2021-12-29_13.15.08.xml	7.65521e-15
1359	export	YAP_model_2021-12-29_13.15.08.xml	1.84878e-15
1360	diffusion	YAP_model_2021-12-29_13.52.50.xml	8.47151
1361	diffusion_phosph	YAP_model_2021-12-29_13.52.50.xml	1.27885
1362	phosphorylation	YAP_model_2021-12-29_13.52.50.xml	0.0385817
1363	dephosporylation	YAP_model_2021-12-29_13.52.50.xml	0.420277
1364	translation	YAP_model_2021-12-29_13.52.50.xml	0.00832704
1365	degradation	YAP_model_2021-12-29_13.52.50.xml	0.00909884
1366	import	YAP_model_2021-12-29_13.52.50.xml	5.9446e-15
1367	export	YAP_model_2021-12-29_13.52.50.xml	6.38862e-15
1368	diffusion	YAP_model_2021-12-29_14.10.59.xml	4.72844
1369	diffusion_phosph	YAP_model_2021-12-29_14.10.59.xml	1.16488
1370	phosphorylation	YAP_model_2021-12-29_14.10.59.xml	0.0189179
1371	dephosporylation	YAP_model_2021-12-29_14.10.59.xml	0.0706896
1372	translation	YAP_model_2021-12-29_14.10.59.xml	0.00238869
1373	degradation	YAP_model_2021-12-29_14.10.59.xml	0.00799955
1374	import	YAP_model_2021-12-29_14.10.59.xml	9.48762e-15
1375	export	YAP_model_2021-12-29_14.10.59.xml	4.03137e-15
1376	diffusion	YAP_model_2021-12-29_14.14.22.xml	6.84801
1377	diffusion_phosph	YAP_model_2021-12-29_14.14.22.xml	1.10826
1378	phosphorylation	YAP_model_2021-12-29_14.14.22.xml	0.0161412
1379	dephosporylation	YAP_model_2021-12-29_14.14.22.xml	0.062057
1380	translation	YAP_model_2021-12-29_14.14.22.xml	0.00564766
1381	degradation	YAP_model_2021-12-29_14.14.22.xml	0.00596749
1382	import	YAP_model_2021-12-29_14.14.22.xml	4.19308e-15
1383	export	YAP_model_2021-12-29_14.14.22.xml	5.40787e-15
1384	diffusion	YAP_model_2021-12-29_14.52.27.xml	4.61778
1385	diffusion_phosph	YAP_model_2021-12-29_14.52.27.xml	1.01371
1386	phosphorylation	YAP_model_2021-12-29_14.52.27.xml	0.014825
1387	dephosporylation	YAP_model_2021-12-29_14.52.27.xml	0.103849
1388	translation	YAP_model_2021-12-29_14.52.27.xml	0.0072023
1389	degradation	YAP_model_2021-12-29_14.52.27.xml	0.00549044
1390	import	YAP_model_2021-12-29_14.52.27.xml	9.05388e-15
1391	export	YAP_model_2021-12-29_14.52.27.xml	3.69017e-15
1392	diffusion	YAP_model_2021-12-29_15.02.42.xml	4.98746
1393	diffusion_phosph	YAP_model_2021-12-29_15.02.42.xml	1.16157
1394	phosphorylation	YAP_model_2021-12-29_15.02.42.xml	0.0653331
1395	dephosporylation	YAP_model_2021-12-29_15.02.42.xml	0.277383
1396	translation	YAP_model_2021-12-29_15.02.42.xml	0.00672063
1397	degradation	YAP_model_2021-12-29_15.02.42.xml	0.00458051
1398	import	YAP_model_2021-12-29_15.02.42.xml	8.84458e-15
1399	export	YAP_model_2021-12-29_15.02.42.xml	2.23162e-16
1400	diffusion	YAP_model_2021-12-29_15.06.17.xml	4.04982
1401	diffusion_phosph	YAP_model_2021-12-29_15.06.17.xml	1.0117
1402	phosphorylation	YAP_model_2021-12-29_15.06.17.xml	0.0255059
1403	dephosporylation	YAP_model_2021-12-29_15.06.17.xml	0.202429
1404	translation	YAP_model_2021-12-29_15.06.17.xml	0.00528312
1405	degradation	YAP_model_2021-12-29_15.06.17.xml	0.00780214
1406	import	YAP_model_2021-12-29_15.06.17.xml	7.78279e-15
1407	export	YAP_model_2021-12-29_15.06.17.xml	6.42312e-15
1408	diffusion	YAP_model_2021-12-29_15.08.39.xml	5.23672
1409	diffusion_phosph	YAP_model_2021-12-29_15.08.39.xml	1.17935
1410	phosphorylation	YAP_model_2021-12-29_15.08.39.xml	0.0284944
1411	dephosporylation	YAP_model_2021-12-29_15.08.39.xml	0.178098
1412	translation	YAP_model_2021-12-29_15.08.39.xml	0.00776886
1413	degradation	YAP_model_2021-12-29_15.08.39.xml	0.00781295
1414	import	YAP_model_2021-12-29_15.08.39.xml	9.87226e-15
1415	export	YAP_model_2021-12-29_15.08.39.xml	3.26754e-15
1416	diffusion	YAP_model_2021-12-29_15.19.53.xml	6.30053
1417	diffusion_phosph	YAP_model_2021-12-29_15.19.53.xml	1.23064
1418	phosphorylation	YAP_model_2021-12-29_15.19.53.xml	0.0198841
1419	dephosporylation	YAP_model_2021-12-29_15.19.53.xml	0.0234144
1420	translation	YAP_model_2021-12-29_15.19.53.xml	0.00143103
1421	degradation	YAP_model_2021-12-29_15.19.53.xml	0.00951292
1422	import	YAP_model_2021-12-29_15.19.53.xml	8.37825e-15
1423	export	YAP_model_2021-12-29_15.19.53.xml	8.01586e-15
1424	diffusion	YAP_model_2021-12-29_15.24.49.xml	6.45304
1425	diffusion_phosph	YAP_model_2021-12-29_15.24.49.xml	1.17268
1426	phosphorylation	YAP_model_2021-12-29_15.24.49.xml	0.0413825
1427	dephosporylation	YAP_model_2021-12-29_15.24.49.xml	0.408976
1428	translation	YAP_model_2021-12-29_15.24.49.xml	0.00616406
1429	degradation	YAP_model_2021-12-29_15.24.49.xml	0.00971623
1430	import	YAP_model_2021-12-29_15.24.49.xml	7.8906e-15
1431	export	YAP_model_2021-12-29_15.24.49.xml	7.84922e-15
1432	diffusion	YAP_model_2021-12-29_15.26.01.xml	9.08819
1433	diffusion_phosph	YAP_model_2021-12-29_15.26.01.xml	1.42095
1434	phosphorylation	YAP_model_2021-12-29_15.26.01.xml	0.0330191
1435	dephosporylation	YAP_model_2021-12-29_15.26.01.xml	0.402728
1436	translation	YAP_model_2021-12-29_15.26.01.xml	0.00834152
1437	degradation	YAP_model_2021-12-29_15.26.01.xml	0.00715581
1438	import	YAP_model_2021-12-29_15.26.01.xml	8.50049e-15
1439	export	YAP_model_2021-12-29_15.26.01.xml	5.10288e-15
1440	diffusion	YAP_model_2021-12-29_15.31.51.xml	5.48773
1441	diffusion_phosph	YAP_model_2021-12-29_15.31.51.xml	1.0191
1442	phosphorylation	YAP_model_2021-12-29_15.31.51.xml	0.028404
1443	dephosporylation	YAP_model_2021-12-29_15.31.51.xml	0.102174
1444	translation	YAP_model_2021-12-29_15.31.51.xml	0.00994828
1445	degradation	YAP_model_2021-12-29_15.31.51.xml	0.00993912
1446	import	YAP_model_2021-12-29_15.31.51.xml	9.31579e-15
1447	export	YAP_model_2021-12-29_15.31.51.xml	4.52712e-15
1448	diffusion	YAP_model_2021-12-29_15.56.59.xml	5.19694
1449	diffusion_phosph	YAP_model_2021-12-29_15.56.59.xml	1.16305
1450	phosphorylation	YAP_model_2021-12-29_15.56.59.xml	0.0278556
1451	dephosporylation	YAP_model_2021-12-29_15.56.59.xml	0.183313
1452	translation	YAP_model_2021-12-29_15.56.59.xml	0.00803906
1453	degradation	YAP_model_2021-12-29_15.56.59.xml	0.00928691
1454	import	YAP_model_2021-12-29_15.56.59.xml	9.28037e-15
1455	export	YAP_model_2021-12-29_15.56.59.xml	4.065e-15
1456	diffusion	YAP_model_2021-12-29_16.10.51.xml	6.2213
1457	diffusion_phosph	YAP_model_2021-12-29_16.10.51.xml	1.16425
1458	phosphorylation	YAP_model_2021-12-29_16.10.51.xml	0.0246496
1459	dephosporylation	YAP_model_2021-12-29_16.10.51.xml	0.12613
1460	translation	YAP_model_2021-12-29_16.10.51.xml	0.00370059
1461	degradation	YAP_model_2021-12-29_16.10.51.xml	0.00741826
1462	import	YAP_model_2021-12-29_16.10.51.xml	8.89878e-15
1463	export	YAP_model_2021-12-29_16.10.51.xml	5.6995e-15
1464	diffusion	YAP_model_2021-12-29_16.11.54.xml	5.8248
1465	diffusion_phosph	YAP_model_2021-12-29_16.11.54.xml	1.24408
1466	phosphorylation	YAP_model_2021-12-29_16.11.54.xml	0.0324767
1467	dephosporylation	YAP_model_2021-12-29_16.11.54.xml	0.247896
1468	translation	YAP_model_2021-12-29_16.11.54.xml	0.00935107
1469	degradation	YAP_model_2021-12-29_16.11.54.xml	0.00951988
1470	import	YAP_model_2021-12-29_16.11.54.xml	9.07345e-15
1471	export	YAP_model_2021-12-29_16.11.54.xml	8.29603e-15
1472	diffusion	YAP_model_2021-12-29_16.18.57.xml	4.61085
1473	diffusion_phosph	YAP_model_2021-12-29_16.18.57.xml	1.15076
1474	phosphorylation	YAP_model_2021-12-29_16.18.57.xml	0.0340091
1475	dephosporylation	YAP_model_2021-12-29_16.18.57.xml	0.170326
1476	translation	YAP_model_2021-12-29_16.18.57.xml	0.00283667
1477	degradation	YAP_model_2021-12-29_16.18.57.xml	0.00695972
1478	import	YAP_model_2021-12-29_16.18.57.xml	9.50423e-15
1479	export	YAP_model_2021-12-29_16.18.57.xml	6.75778e-16
1480	diffusion	YAP_model_2021-12-29_16.19.21.xml	6.86444
1481	diffusion_phosph	YAP_model_2021-12-29_16.19.21.xml	1.36373
1482	phosphorylation	YAP_model_2021-12-29_16.19.21.xml	0.0359884
1483	dephosporylation	YAP_model_2021-12-29_16.19.21.xml	0.251251
1484	translation	YAP_model_2021-12-29_16.19.21.xml	0.00941859
1485	degradation	YAP_model_2021-12-29_16.19.21.xml	0.00996973
1486	import	YAP_model_2021-12-29_16.19.21.xml	4.42336e-15
1487	export	YAP_model_2021-12-29_16.19.21.xml	4.39212e-15
1488	diffusion	YAP_model_2021-12-29_16.20.52.xml	5.9183
1489	diffusion_phosph	YAP_model_2021-12-29_16.20.52.xml	1.23004
1490	phosphorylation	YAP_model_2021-12-29_16.20.52.xml	0.0422405
1491	dephosporylation	YAP_model_2021-12-29_16.20.52.xml	0.382099
1492	translation	YAP_model_2021-12-29_16.20.52.xml	0.00554132
1493	degradation	YAP_model_2021-12-29_16.20.52.xml	0.00997228
1494	import	YAP_model_2021-12-29_16.20.52.xml	9.66411e-15
1495	export	YAP_model_2021-12-29_16.20.52.xml	8.37407e-15
1496	diffusion	YAP_model_2021-12-29_16.37.30.xml	8.89731
1497	diffusion_phosph	YAP_model_2021-12-29_16.37.30.xml	1.2224
1498	phosphorylation	YAP_model_2021-12-29_16.37.30.xml	0.0399242
1499	dephosporylation	YAP_model_2021-12-29_16.37.30.xml	0.458068
1500	translation	YAP_model_2021-12-29_16.37.30.xml	0.00517751
1501	degradation	YAP_model_2021-12-29_16.37.30.xml	0.00939408
1502	import	YAP_model_2021-12-29_16.37.30.xml	6.98597e-15
1503	export	YAP_model_2021-12-29_16.37.30.xml	7.41045e-15
1504	diffusion	YAP_model_2021-12-29_16.50.05.xml	6.00678
1505	diffusion_phosph	YAP_model_2021-12-29_16.50.05.xml	1.16702
1506	phosphorylation	YAP_model_2021-12-29_16.50.05.xml	0.0209853
1507	dephosporylation	YAP_model_2021-12-29_16.50.05.xml	0.0371566
1508	translation	YAP_model_2021-12-29_16.50.05.xml	0.00334705
1509	degradation	YAP_model_2021-12-29_16.50.05.xml	0.00596028
1510	import	YAP_model_2021-12-29_16.50.05.xml	8.40021e-15
1511	export	YAP_model_2021-12-29_16.50.05.xml	5.49233e-16
1512	diffusion	YAP_model_2021-12-29_17.05.49.xml	6.37295
1513	diffusion_phosph	YAP_model_2021-12-29_17.05.49.xml	1.1934
1514	phosphorylation	YAP_model_2021-12-29_17.05.49.xml	0.0178751
1515	dephosporylation	YAP_model_2021-12-29_17.05.49.xml	0.041426
1516	translation	YAP_model_2021-12-29_17.05.49.xml	0.00370068
1517	degradation	YAP_model_2021-12-29_17.05.49.xml	0.00914992
1518	import	YAP_model_2021-12-29_17.05.49.xml	5.3514e-15
1519	export	YAP_model_2021-12-29_17.05.49.xml	1.23982e-15
1520	diffusion	YAP_model_2021-12-29_17.10.35.xml	4.42939
1521	diffusion_phosph	YAP_model_2021-12-29_17.10.35.xml	1.18591
1522	phosphorylation	YAP_model_2021-12-29_17.10.35.xml	0.0350796
1523	dephosporylation	YAP_model_2021-12-29_17.10.35.xml	0.481473
1524	translation	YAP_model_2021-12-29_17.10.35.xml	0.00391643
1525	degradation	YAP_model_2021-12-29_17.10.35.xml	0.00761777
1526	import	YAP_model_2021-12-29_17.10.35.xml	9.57002e-15
1527	export	YAP_model_2021-12-29_17.10.35.xml	9.12764e-15
1528	diffusion	YAP_model_2021-12-29_17.16.23.xml	5.36193
1529	diffusion_phosph	YAP_model_2021-12-29_17.16.23.xml	1.01638
1530	phosphorylation	YAP_model_2021-12-29_17.16.23.xml	0.0459101
1531	dephosporylation	YAP_model_2021-12-29_17.16.23.xml	0.188442
1532	translation	YAP_model_2021-12-29_17.16.23.xml	0.0070475
1533	degradation	YAP_model_2021-12-29_17.16.23.xml	0.0071884
1534	import	YAP_model_2021-12-29_17.16.23.xml	8.10279e-15
1535	export	YAP_model_2021-12-29_17.16.23.xml	7.67133e-16
1536	diffusion	YAP_model_2021-12-29_17.27.11.xml	6.6568
1537	diffusion_phosph	YAP_model_2021-12-29_17.27.11.xml	1.18848
1538	phosphorylation	YAP_model_2021-12-29_17.27.11.xml	0.0263796
1539	dephosporylation	YAP_model_2021-12-29_17.27.11.xml	0.257976
1540	translation	YAP_model_2021-12-29_17.27.11.xml	0.00448816
1541	degradation	YAP_model_2021-12-29_17.27.11.xml	0.00752284
1542	import	YAP_model_2021-12-29_17.27.11.xml	8.81458e-15
1543	export	YAP_model_2021-12-29_17.27.11.xml	8.19408e-15
1544	diffusion	YAP_model_2021-12-29_17.27.47.xml	9.84707
1545	diffusion_phosph	YAP_model_2021-12-29_17.27.47.xml	1.04518
1546	phosphorylation	YAP_model_2021-12-29_17.27.47.xml	0.0288398
1547	dephosporylation	YAP_model_2021-12-29_17.27.47.xml	0.0912107
1548	translation	YAP_model_2021-12-29_17.27.47.xml	0.00940309
1549	degradation	YAP_model_2021-12-29_17.27.47.xml	0.00942992
1550	import	YAP_model_2021-12-29_17.27.47.xml	6.58456e-15
1551	export	YAP_model_2021-12-29_17.27.47.xml	7.88199e-15
1552	diffusion	YAP_model_2021-12-29_17.30.59.xml	7.51347
1553	diffusion_phosph	YAP_model_2021-12-29_17.30.59.xml	1.25051
1554	phosphorylation	YAP_model_2021-12-29_17.30.59.xml	0.0350497
1555	dephosporylation	YAP_model_2021-12-29_17.30.59.xml	0.157643
1556	translation	YAP_model_2021-12-29_17.30.59.xml	0.00200925
1557	degradation	YAP_model_2021-12-29_17.30.59.xml	0.00952195
1558	import	YAP_model_2021-12-29_17.30.59.xml	8.33127e-15
1559	export	YAP_model_2021-12-29_17.30.59.xml	1.06064e-15
1560	diffusion	YAP_model_2021-12-29_17.40.20.xml	6.00194
1561	diffusion_phosph	YAP_model_2021-12-29_17.40.20.xml	1.1971
1562	phosphorylation	YAP_model_2021-12-29_17.40.20.xml	0.0178861
1563	dephosporylation	YAP_model_2021-12-29_17.40.20.xml	0.067781
1564	translation	YAP_model_2021-12-29_17.40.20.xml	0.00706677
1565	degradation	YAP_model_2021-12-29_17.40.20.xml	0.00786488
1566	import	YAP_model_2021-12-29_17.40.20.xml	8.87524e-15
1567	export	YAP_model_2021-12-29_17.40.20.xml	3.98775e-15
1568	diffusion	YAP_model_2021-12-29_18.05.51.xml	5.62273
1569	diffusion_phosph	YAP_model_2021-12-29_18.05.51.xml	1.22492
1570	phosphorylation	YAP_model_2021-12-29_18.05.51.xml	0.0369784
1571	dephosporylation	YAP_model_2021-12-29_18.05.51.xml	0.431363
1572	translation	YAP_model_2021-12-29_18.05.51.xml	0.00556285
1573	degradation	YAP_model_2021-12-29_18.05.51.xml	0.0058622
1574	import	YAP_model_2021-12-29_18.05.51.xml	9.72128e-15
1575	export	YAP_model_2021-12-29_18.05.51.xml	2.13096e-15
1576	diffusion	YAP_model_2021-12-29_18.07.53.xml	5.82431
1577	diffusion_phosph	YAP_model_2021-12-29_18.07.53.xml	1.0432
1578	phosphorylation	YAP_model_2021-12-29_18.07.53.xml	0.0186451
1579	dephosporylation	YAP_model_2021-12-29_18.07.53.xml	0.098966
1580	translation	YAP_model_2021-12-29_18.07.53.xml	0.00633542
1581	degradation	YAP_model_2021-12-29_18.07.53.xml	0.0055513
1582	import	YAP_model_2021-12-29_18.07.53.xml	3.63592e-15
1583	export	YAP_model_2021-12-29_18.07.53.xml	5.83066e-15
1584	diffusion	YAP_model_2021-12-29_18.10.18.xml	6.09734
1585	diffusion_phosph	YAP_model_2021-12-29_18.10.18.xml	1.20909
1586	phosphorylation	YAP_model_2021-12-29_18.10.18.xml	0.0225959
1587	dephosporylation	YAP_model_2021-12-29_18.10.18.xml	0.333631
1588	translation	YAP_model_2021-12-29_18.10.18.xml	0.00490358
1589	degradation	YAP_model_2021-12-29_18.10.18.xml	0.00481744
1590	import	YAP_model_2021-12-29_18.10.18.xml	9.9082e-15
1591	export	YAP_model_2021-12-29_18.10.18.xml	8.74698e-15
1592	diffusion	YAP_model_2021-12-29_18.24.16.xml	6.83964
1593	diffusion_phosph	YAP_model_2021-12-29_18.24.16.xml	1.23153
1594	phosphorylation	YAP_model_2021-12-29_18.24.16.xml	0.0218318
1595	dephosporylation	YAP_model_2021-12-29_18.24.16.xml	0.036182
1596	translation	YAP_model_2021-12-29_18.24.16.xml	0.00505743
1597	degradation	YAP_model_2021-12-29_18.24.16.xml	0.00930162
1598	import	YAP_model_2021-12-29_18.24.16.xml	4.88286e-15
1599	export	YAP_model_2021-12-29_18.24.16.xml	2.99571e-15
