# Supplementary material for: Spatial modeling reveals nuclear phosphorylation and subcellular shuttling of YAP upon drug-induced liver injury
Source: eLife. 2022 Oct 18;11:e78540. doi: 10.7554/eLife.78540 (PMC9578710; doi:10.7554/eLife.78540)
Supplement: Supplementary file 2. [file elife-78540-supp2.xlsx]

## Sheet: Sheet1
	reaction	model	value
0	diffusion	TAZ_model_2021-12-27_13.08.35.xml	6.18751
1	diffusion_phosph	TAZ_model_2021-12-27_13.08.35.xml	1.01384
2	phosphorylation	TAZ_model_2021-12-27_13.08.35.xml	0.465129
3	dephosporylation	TAZ_model_2021-12-27_13.08.35.xml	0.0311801
4	translation	TAZ_model_2021-12-27_13.08.35.xml	0.00715938
5	degradation	TAZ_model_2021-12-27_13.08.35.xml	0.00866018
6	import	TAZ_model_2021-12-27_13.08.35.xml	9.23812e-15
7	export	TAZ_model_2021-12-27_13.08.35.xml	4.55429e-16
8	diffusion	TAZ_model_2021-12-27_13.15.30.xml	8.26108
9	diffusion_phosph	TAZ_model_2021-12-27_13.15.30.xml	1.04317
10	phosphorylation	TAZ_model_2021-12-27_13.15.30.xml	0.420093
11	dephosporylation	TAZ_model_2021-12-27_13.15.30.xml	0.172367
12	translation	TAZ_model_2021-12-27_13.15.30.xml	0.00667231
13	degradation	TAZ_model_2021-12-27_13.15.30.xml	0.0095777
14	import	TAZ_model_2021-12-27_13.15.30.xml	6.71729e-15
15	export	TAZ_model_2021-12-27_13.15.30.xml	5.17435e-15
16	diffusion	TAZ_model_2021-12-27_13.19.08.xml	9.66085
17	diffusion_phosph	TAZ_model_2021-12-27_13.19.08.xml	1.08221
18	phosphorylation	TAZ_model_2021-12-27_13.19.08.xml	0.175139
19	dephosporylation	TAZ_model_2021-12-27_13.19.08.xml	0.053682
20	translation	TAZ_model_2021-12-27_13.19.08.xml	0.00415846
21	degradation	TAZ_model_2021-12-27_13.19.08.xml	0.00987895
22	import	TAZ_model_2021-12-27_13.19.08.xml	7.53346e-15
23	export	TAZ_model_2021-12-27_13.19.08.xml	6.63512e-15
24	diffusion	TAZ_model_2021-12-27_13.19.22.xml	8.21525
25	diffusion_phosph	TAZ_model_2021-12-27_13.19.22.xml	1.07045
26	phosphorylation	TAZ_model_2021-12-27_13.19.22.xml	0.440214
27	dephosporylation	TAZ_model_2021-12-27_13.19.22.xml	0.1703
28	translation	TAZ_model_2021-12-27_13.19.22.xml	0.0062021
29	degradation	TAZ_model_2021-12-27_13.19.22.xml	0.00997241
30	import	TAZ_model_2021-12-27_13.19.22.xml	6.06059e-15
31	export	TAZ_model_2021-12-27_13.19.22.xml	1.94546e-15
32	diffusion	TAZ_model_2021-12-27_14.23.16.xml	7.49907
33	diffusion_phosph	TAZ_model_2021-12-27_14.23.16.xml	1.09146
34	phosphorylation	TAZ_model_2021-12-27_14.23.16.xml	0.0806434
35	dephosporylation	TAZ_model_2021-12-27_14.23.16.xml	0.0528994
36	translation	TAZ_model_2021-12-27_14.23.16.xml	0.00484732
37	degradation	TAZ_model_2021-12-27_14.23.16.xml	0.00881721
38	import	TAZ_model_2021-12-27_14.23.16.xml	9.77189e-15
39	export	TAZ_model_2021-12-27_14.23.16.xml	5.63297e-15
40	diffusion	TAZ_model_2021-12-27_14.23.19.xml	8.7812
41	diffusion_phosph	TAZ_model_2021-12-27_14.23.19.xml	1.05538
42	phosphorylation	TAZ_model_2021-12-27_14.23.19.xml	0.173161
43	dephosporylation	TAZ_model_2021-12-27_14.23.19.xml	0.140053
44	translation	TAZ_model_2021-12-27_14.23.19.xml	0.00508157
45	degradation	TAZ_model_2021-12-27_14.23.19.xml	0.00968206
46	import	TAZ_model_2021-12-27_14.23.19.xml	9.08553e-15
47	export	TAZ_model_2021-12-27_14.23.19.xml	9.99705e-15
48	diffusion	TAZ_model_2021-12-27_14.26.50.xml	6.84124
49	diffusion_phosph	TAZ_model_2021-12-27_14.26.50.xml	1.03503
50	phosphorylation	TAZ_model_2021-12-27_14.26.50.xml	0.243318
51	dephosporylation	TAZ_model_2021-12-27_14.26.50.xml	0.244536
52	translation	TAZ_model_2021-12-27_14.26.50.xml	0.00587125
53	degradation	TAZ_model_2021-12-27_14.26.50.xml	0.00951976
54	import	TAZ_model_2021-12-27_14.26.50.xml	7.27702e-15
55	export	TAZ_model_2021-12-27_14.26.50.xml	2.08504e-15
56	diffusion	TAZ_model_2021-12-27_14.35.17.xml	8.52611
57	diffusion_phosph	TAZ_model_2021-12-27_14.35.17.xml	1.12295
58	phosphorylation	TAZ_model_2021-12-27_14.35.17.xml	0.108574
59	dephosporylation	TAZ_model_2021-12-27_14.35.17.xml	0.238049
60	translation	TAZ_model_2021-12-27_14.35.17.xml	0.00213388
61	degradation	TAZ_model_2021-12-27_14.35.17.xml	0.00900119
62	import	TAZ_model_2021-12-27_14.35.17.xml	9.88523e-15
63	export	TAZ_model_2021-12-27_14.35.17.xml	7.81498e-15
64	diffusion	TAZ_model_2021-12-27_15.29.09.xml	7.65561
65	diffusion_phosph	TAZ_model_2021-12-27_15.29.09.xml	1.10485
66	phosphorylation	TAZ_model_2021-12-27_15.29.09.xml	0.286628
67	dephosporylation	TAZ_model_2021-12-27_15.29.09.xml	0.229409
68	translation	TAZ_model_2021-12-27_15.29.09.xml	0.00516114
69	degradation	TAZ_model_2021-12-27_15.29.09.xml	0.00946151
70	import	TAZ_model_2021-12-27_15.29.09.xml	5.25355e-15
71	export	TAZ_model_2021-12-27_15.29.09.xml	2.25e-15
72	diffusion	TAZ_model_2021-12-27_15.36.25.xml	7.34581
73	diffusion_phosph	TAZ_model_2021-12-27_15.36.25.xml	1.04949
74	phosphorylation	TAZ_model_2021-12-27_15.36.25.xml	0.21686
75	dephosporylation	TAZ_model_2021-12-27_15.36.25.xml	0.0377099
76	translation	TAZ_model_2021-12-27_15.36.25.xml	0.00170301
77	degradation	TAZ_model_2021-12-27_15.36.25.xml	0.00984269
78	import	TAZ_model_2021-12-27_15.36.25.xml	8.52306e-15
79	export	TAZ_model_2021-12-27_15.36.25.xml	6.91107e-15
80	diffusion	TAZ_model_2021-12-27_15.36.41.xml	8.34026
81	diffusion_phosph	TAZ_model_2021-12-27_15.36.41.xml	1.1001
82	phosphorylation	TAZ_model_2021-12-27_15.36.41.xml	0.20424
83	dephosporylation	TAZ_model_2021-12-27_15.36.41.xml	0.451142
84	translation	TAZ_model_2021-12-27_15.36.41.xml	0.00641912
85	degradation	TAZ_model_2021-12-27_15.36.41.xml	0.00984965
86	import	TAZ_model_2021-12-27_15.36.41.xml	4.26249e-15
87	export	TAZ_model_2021-12-27_15.36.41.xml	6.58698e-15
88	diffusion	TAZ_model_2021-12-27_15.46.19.xml	8.13071
89	diffusion_phosph	TAZ_model_2021-12-27_15.46.19.xml	1.1015
90	phosphorylation	TAZ_model_2021-12-27_15.46.19.xml	0.285092
91	dephosporylation	TAZ_model_2021-12-27_15.46.19.xml	0.0334361
92	translation	TAZ_model_2021-12-27_15.46.19.xml	0.00568302
93	degradation	TAZ_model_2021-12-27_15.46.19.xml	0.00960877
94	import	TAZ_model_2021-12-27_15.46.19.xml	5.83326e-15
95	export	TAZ_model_2021-12-27_15.46.19.xml	9.83086e-16
96	diffusion	TAZ_model_2021-12-27_16.40.22.xml	9.13313
97	diffusion_phosph	TAZ_model_2021-12-27_16.40.22.xml	1.03604
98	phosphorylation	TAZ_model_2021-12-27_16.40.22.xml	0.357628
99	dephosporylation	TAZ_model_2021-12-27_16.40.22.xml	0.0135531
100	translation	TAZ_model_2021-12-27_16.40.22.xml	0.0067738
101	degradation	TAZ_model_2021-12-27_16.40.22.xml	0.00885586
102	import	TAZ_model_2021-12-27_16.40.22.xml	7.31658e-15
103	export	TAZ_model_2021-12-27_16.40.22.xml	7.27769e-16
104	diffusion	TAZ_model_2021-12-27_16.40.33.xml	7.07415
105	diffusion_phosph	TAZ_model_2021-12-27_16.40.33.xml	1.055
106	phosphorylation	TAZ_model_2021-12-27_16.40.33.xml	0.262111
107	dephosporylation	TAZ_model_2021-12-27_16.40.33.xml	0.201623
108	translation	TAZ_model_2021-12-27_16.40.33.xml	0.00766329
109	degradation	TAZ_model_2021-12-27_16.40.33.xml	0.00969176
110	import	TAZ_model_2021-12-27_16.40.33.xml	6.05959e-15
111	export	TAZ_model_2021-12-27_16.40.33.xml	1.91018e-15
112	diffusion	TAZ_model_2021-12-27_16.46.48.xml	7.59613
113	diffusion_phosph	TAZ_model_2021-12-27_16.46.48.xml	1.00263
114	phosphorylation	TAZ_model_2021-12-27_16.46.48.xml	0.199666
115	dephosporylation	TAZ_model_2021-12-27_16.46.48.xml	0.320745
116	translation	TAZ_model_2021-12-27_16.46.48.xml	0.00726013
117	degradation	TAZ_model_2021-12-27_16.46.48.xml	0.00990866
118	import	TAZ_model_2021-12-27_16.46.48.xml	3.1637e-15
119	export	TAZ_model_2021-12-27_16.46.48.xml	5.68031e-15
120	diffusion	TAZ_model_2021-12-27_16.59.59.xml	8.51516
121	diffusion_phosph	TAZ_model_2021-12-27_16.59.59.xml	1.09866
122	phosphorylation	TAZ_model_2021-12-27_16.59.59.xml	0.346341
123	dephosporylation	TAZ_model_2021-12-27_16.59.59.xml	0.0941656
124	translation	TAZ_model_2021-12-27_16.59.59.xml	0.00984915
125	degradation	TAZ_model_2021-12-27_16.59.59.xml	0.00995568
126	import	TAZ_model_2021-12-27_16.59.59.xml	9.60036e-15
127	export	TAZ_model_2021-12-27_16.59.59.xml	1.57226e-15
128	diffusion	TAZ_model_2021-12-27_17.51.04.xml	8.02729
129	diffusion_phosph	TAZ_model_2021-12-27_17.51.04.xml	1.07035
130	phosphorylation	TAZ_model_2021-12-27_17.51.04.xml	0.214514
131	dephosporylation	TAZ_model_2021-12-27_17.51.04.xml	0.159088
132	translation	TAZ_model_2021-12-27_17.51.04.xml	0.00606501
133	degradation	TAZ_model_2021-12-27_17.51.04.xml	0.00973555
134	import	TAZ_model_2021-12-27_17.51.04.xml	8.78691e-15
135	export	TAZ_model_2021-12-27_17.51.04.xml	3.08025e-15
136	diffusion	TAZ_model_2021-12-27_17.51.23.xml	8.34422
137	diffusion_phosph	TAZ_model_2021-12-27_17.51.23.xml	1.0398
138	phosphorylation	TAZ_model_2021-12-27_17.51.23.xml	0.265657
139	dephosporylation	TAZ_model_2021-12-27_17.51.23.xml	0.164235
140	translation	TAZ_model_2021-12-27_17.51.23.xml	0.00596277
141	degradation	TAZ_model_2021-12-27_17.51.23.xml	0.00996523
142	import	TAZ_model_2021-12-27_17.51.23.xml	5.31167e-15
143	export	TAZ_model_2021-12-27_17.51.23.xml	2.04423e-15
144	diffusion	TAZ_model_2021-12-27_17.55.00.xml	7.27825
145	diffusion_phosph	TAZ_model_2021-12-27_17.55.00.xml	1.07506
146	phosphorylation	TAZ_model_2021-12-27_17.55.00.xml	0.362509
147	dephosporylation	TAZ_model_2021-12-27_17.55.00.xml	0.0261219
148	translation	TAZ_model_2021-12-27_17.55.00.xml	0.00621968
149	degradation	TAZ_model_2021-12-27_17.55.00.xml	0.00929555
150	import	TAZ_model_2021-12-27_17.55.00.xml	4.25167e-15
151	export	TAZ_model_2021-12-27_17.55.00.xml	1.2455e-15
152	diffusion	TAZ_model_2021-12-27_18.07.06.xml	7.29553
153	diffusion_phosph	TAZ_model_2021-12-27_18.07.06.xml	1.03548
154	phosphorylation	TAZ_model_2021-12-27_18.07.06.xml	0.164262
155	dephosporylation	TAZ_model_2021-12-27_18.07.06.xml	0.362443
156	translation	TAZ_model_2021-12-27_18.07.06.xml	0.0063252
157	degradation	TAZ_model_2021-12-27_18.07.06.xml	0.00897223
158	import	TAZ_model_2021-12-27_18.07.06.xml	9.67754e-15
159	export	TAZ_model_2021-12-27_18.07.06.xml	4.6033e-15
160	diffusion	TAZ_model_2021-12-27_18.59.11.xml	6.53236
161	diffusion_phosph	TAZ_model_2021-12-27_18.59.11.xml	1.03104
162	phosphorylation	TAZ_model_2021-12-27_18.59.11.xml	0.357949
163	dephosporylation	TAZ_model_2021-12-27_18.59.11.xml	0.237894
164	translation	TAZ_model_2021-12-27_18.59.11.xml	0.00764069
165	degradation	TAZ_model_2021-12-27_18.59.11.xml	0.00955071
166	import	TAZ_model_2021-12-27_18.59.11.xml	6.62608e-15
167	export	TAZ_model_2021-12-27_18.59.11.xml	7.8865e-16
168	diffusion	TAZ_model_2021-12-27_18.59.56.xml	7.78743
169	diffusion_phosph	TAZ_model_2021-12-27_18.59.56.xml	1.10978
170	phosphorylation	TAZ_model_2021-12-27_18.59.56.xml	0.170444
171	dephosporylation	TAZ_model_2021-12-27_18.59.56.xml	0.170755
172	translation	TAZ_model_2021-12-27_18.59.56.xml	0.0082
173	degradation	TAZ_model_2021-12-27_18.59.56.xml	0.00999674
174	import	TAZ_model_2021-12-27_18.59.56.xml	9.15275e-15
175	export	TAZ_model_2021-12-27_18.59.56.xml	6.3025e-15
176	diffusion	TAZ_model_2021-12-27_19.04.46.xml	9.08512
177	diffusion_phosph	TAZ_model_2021-12-27_19.04.46.xml	1.09705
178	phosphorylation	TAZ_model_2021-12-27_19.04.46.xml	0.358577
179	dephosporylation	TAZ_model_2021-12-27_19.04.46.xml	0.0670369
180	translation	TAZ_model_2021-12-27_19.04.46.xml	0.00595584
181	degradation	TAZ_model_2021-12-27_19.04.46.xml	0.00966157
182	import	TAZ_model_2021-12-27_19.04.46.xml	8.68247e-15
183	export	TAZ_model_2021-12-27_19.04.46.xml	3.07465e-15
184	diffusion	TAZ_model_2021-12-27_19.09.08.xml	6.03499
185	diffusion_phosph	TAZ_model_2021-12-27_19.09.08.xml	1.07125
186	phosphorylation	TAZ_model_2021-12-27_19.09.08.xml	0.429174
187	dephosporylation	TAZ_model_2021-12-27_19.09.08.xml	0.205292
188	translation	TAZ_model_2021-12-27_19.09.08.xml	0.00441413
189	degradation	TAZ_model_2021-12-27_19.09.08.xml	0.00990788
190	import	TAZ_model_2021-12-27_19.09.08.xml	9.0111e-15
191	export	TAZ_model_2021-12-27_19.09.08.xml	1.95472e-15
192	diffusion	TAZ_model_2021-12-27_20.11.00.xml	7.56132
193	diffusion_phosph	TAZ_model_2021-12-27_20.11.00.xml	1.09443
194	phosphorylation	TAZ_model_2021-12-27_20.11.00.xml	0.0810831
195	dephosporylation	TAZ_model_2021-12-27_20.11.00.xml	0.085807
196	translation	TAZ_model_2021-12-27_20.11.00.xml	0.00295321
197	degradation	TAZ_model_2021-12-27_20.11.00.xml	0.00865006
198	import	TAZ_model_2021-12-27_20.11.00.xml	3.13568e-15
199	export	TAZ_model_2021-12-27_20.11.00.xml	7.34578e-15
200	diffusion	TAZ_model_2021-12-27_20.11.14.xml	8.47736
201	diffusion_phosph	TAZ_model_2021-12-27_20.11.14.xml	1.0448
202	phosphorylation	TAZ_model_2021-12-27_20.11.14.xml	0.234337
203	dephosporylation	TAZ_model_2021-12-27_20.11.14.xml	0.172839
204	translation	TAZ_model_2021-12-27_20.11.14.xml	0.00385472
205	degradation	TAZ_model_2021-12-27_20.11.14.xml	0.0093946
206	import	TAZ_model_2021-12-27_20.11.14.xml	8.02115e-15
207	export	TAZ_model_2021-12-27_20.11.14.xml	6.69987e-15
208	diffusion	TAZ_model_2021-12-27_20.18.22.xml	9.43762
209	diffusion_phosph	TAZ_model_2021-12-27_20.18.22.xml	1.03456
210	phosphorylation	TAZ_model_2021-12-27_20.18.22.xml	0.430268
211	dephosporylation	TAZ_model_2021-12-27_20.18.22.xml	0.0353291
212	translation	TAZ_model_2021-12-27_20.18.22.xml	0.00569311
213	degradation	TAZ_model_2021-12-27_20.18.22.xml	0.00972299
214	import	TAZ_model_2021-12-27_20.18.22.xml	3.57486e-15
215	export	TAZ_model_2021-12-27_20.18.22.xml	1.57298e-15
216	diffusion	TAZ_model_2021-12-27_20.19.44.xml	7.0232
217	diffusion_phosph	TAZ_model_2021-12-27_20.19.44.xml	1.00001
218	phosphorylation	TAZ_model_2021-12-27_20.19.44.xml	0.335949
219	dephosporylation	TAZ_model_2021-12-27_20.19.44.xml	0.209255
220	translation	TAZ_model_2021-12-27_20.19.44.xml	0.00548386
221	degradation	TAZ_model_2021-12-27_20.19.44.xml	0.00979048
222	import	TAZ_model_2021-12-27_20.19.44.xml	7.06253e-15
223	export	TAZ_model_2021-12-27_20.19.44.xml	6.00501e-15
224	diffusion	TAZ_model_2021-12-27_21.23.44.xml	8.40686
225	diffusion_phosph	TAZ_model_2021-12-27_21.23.44.xml	1.01268
226	phosphorylation	TAZ_model_2021-12-27_21.23.44.xml	0.330209
227	dephosporylation	TAZ_model_2021-12-27_21.23.44.xml	0.156646
228	translation	TAZ_model_2021-12-27_21.23.44.xml	0.00547745
229	degradation	TAZ_model_2021-12-27_21.23.44.xml	0.00992607
230	import	TAZ_model_2021-12-27_21.23.44.xml	5.22515e-15
231	export	TAZ_model_2021-12-27_21.23.44.xml	6.51024e-15
232	diffusion	TAZ_model_2021-12-27_21.25.27.xml	6.41961
233	diffusion_phosph	TAZ_model_2021-12-27_21.25.27.xml	1.07427
234	phosphorylation	TAZ_model_2021-12-27_21.25.27.xml	0.239827
235	dephosporylation	TAZ_model_2021-12-27_21.25.27.xml	0.136705
236	translation	TAZ_model_2021-12-27_21.25.27.xml	0.00617867
237	degradation	TAZ_model_2021-12-27_21.25.27.xml	0.00990203
238	import	TAZ_model_2021-12-27_21.25.27.xml	8.06298e-15
239	export	TAZ_model_2021-12-27_21.25.27.xml	2.10977e-15
240	diffusion	TAZ_model_2021-12-27_21.25.29.xml	7.65913
241	diffusion_phosph	TAZ_model_2021-12-27_21.25.29.xml	1.09533
242	phosphorylation	TAZ_model_2021-12-27_21.25.29.xml	0.0612599
243	dephosporylation	TAZ_model_2021-12-27_21.25.29.xml	0.0218921
244	translation	TAZ_model_2021-12-27_21.25.29.xml	0.00293993
245	degradation	TAZ_model_2021-12-27_21.25.29.xml	0.00879651
246	import	TAZ_model_2021-12-27_21.25.29.xml	9.74204e-15
247	export	TAZ_model_2021-12-27_21.25.29.xml	9.27516e-15
248	diffusion	TAZ_model_2021-12-27_21.26.27.xml	7.13033
249	diffusion_phosph	TAZ_model_2021-12-27_21.26.27.xml	1.04386
250	phosphorylation	TAZ_model_2021-12-27_21.26.27.xml	0.117033
251	dephosporylation	TAZ_model_2021-12-27_21.26.27.xml	0.193684
252	translation	TAZ_model_2021-12-27_21.26.27.xml	0.00685701
253	degradation	TAZ_model_2021-12-27_21.26.27.xml	0.00984478
254	import	TAZ_model_2021-12-27_21.26.27.xml	5.19527e-15
255	export	TAZ_model_2021-12-27_21.26.27.xml	6.63551e-15
256	diffusion	TAZ_model_2021-12-27_22.30.40.xml	7.3443
257	diffusion_phosph	TAZ_model_2021-12-27_22.30.40.xml	1.00114
258	phosphorylation	TAZ_model_2021-12-27_22.30.40.xml	0.125289
259	dephosporylation	TAZ_model_2021-12-27_22.30.40.xml	0.167681
260	translation	TAZ_model_2021-12-27_22.30.40.xml	0.00439901
261	degradation	TAZ_model_2021-12-27_22.30.40.xml	0.00885713
262	import	TAZ_model_2021-12-27_22.30.40.xml	7.31418e-15
263	export	TAZ_model_2021-12-27_22.30.40.xml	7.79255e-15
264	diffusion	TAZ_model_2021-12-27_22.34.41.xml	7.82254
265	diffusion_phosph	TAZ_model_2021-12-27_22.34.41.xml	1.01641
266	phosphorylation	TAZ_model_2021-12-27_22.34.41.xml	0.237844
267	dephosporylation	TAZ_model_2021-12-27_22.34.41.xml	0.136583
268	translation	TAZ_model_2021-12-27_22.34.41.xml	0.004219
269	degradation	TAZ_model_2021-12-27_22.34.41.xml	0.00984192
270	import	TAZ_model_2021-12-27_22.34.41.xml	8.26894e-15
271	export	TAZ_model_2021-12-27_22.34.41.xml	2.88505e-15
272	diffusion	TAZ_model_2021-12-27_22.35.45.xml	9.80461
273	diffusion_phosph	TAZ_model_2021-12-27_22.35.45.xml	1.05698
274	phosphorylation	TAZ_model_2021-12-27_22.35.45.xml	0.140131
275	dephosporylation	TAZ_model_2021-12-27_22.35.45.xml	0.100931
276	translation	TAZ_model_2021-12-27_22.35.45.xml	0.00167602
277	degradation	TAZ_model_2021-12-27_22.35.45.xml	0.00915047
278	import	TAZ_model_2021-12-27_22.35.45.xml	2.10442e-15
279	export	TAZ_model_2021-12-27_22.35.45.xml	7.42444e-15
280	diffusion	TAZ_model_2021-12-27_22.36.26.xml	6.95254
281	diffusion_phosph	TAZ_model_2021-12-27_22.36.26.xml	1.03041
282	phosphorylation	TAZ_model_2021-12-27_22.36.26.xml	0.372883
283	dephosporylation	TAZ_model_2021-12-27_22.36.26.xml	0.0389065
284	translation	TAZ_model_2021-12-27_22.36.26.xml	0.00459339
285	degradation	TAZ_model_2021-12-27_22.36.26.xml	0.00961441
286	import	TAZ_model_2021-12-27_22.36.26.xml	8.30977e-15
287	export	TAZ_model_2021-12-27_22.36.26.xml	5.25106e-16
288	diffusion	TAZ_model_2021-12-27_23.44.53.xml	8.38563
289	diffusion_phosph	TAZ_model_2021-12-27_23.44.53.xml	1.01323
290	phosphorylation	TAZ_model_2021-12-27_23.44.53.xml	0.18093
291	dephosporylation	TAZ_model_2021-12-27_23.44.53.xml	0.136038
292	translation	TAZ_model_2021-12-27_23.44.53.xml	0.0082667
293	degradation	TAZ_model_2021-12-27_23.44.53.xml	0.00973734
294	import	TAZ_model_2021-12-27_23.44.53.xml	3.19565e-15
295	export	TAZ_model_2021-12-27_23.44.53.xml	3.48634e-15
296	diffusion	TAZ_model_2021-12-27_23.45.58.xml	8.75625
297	diffusion_phosph	TAZ_model_2021-12-27_23.45.58.xml	1.04507
298	phosphorylation	TAZ_model_2021-12-27_23.45.58.xml	0.232246
299	dephosporylation	TAZ_model_2021-12-27_23.45.58.xml	0.0705714
300	translation	TAZ_model_2021-12-27_23.45.58.xml	0.00885391
301	degradation	TAZ_model_2021-12-27_23.45.58.xml	0.00956308
302	import	TAZ_model_2021-12-27_23.45.58.xml	6.87924e-15
303	export	TAZ_model_2021-12-27_23.45.58.xml	5.29424e-15
304	diffusion	TAZ_model_2021-12-27_23.47.58.xml	8.72192
305	diffusion_phosph	TAZ_model_2021-12-27_23.47.58.xml	1.07155
306	phosphorylation	TAZ_model_2021-12-27_23.47.58.xml	0.249235
307	dephosporylation	TAZ_model_2021-12-27_23.47.58.xml	0.339665
308	translation	TAZ_model_2021-12-27_23.47.58.xml	0.00222932
309	degradation	TAZ_model_2021-12-27_23.47.58.xml	0.00982425
310	import	TAZ_model_2021-12-27_23.47.58.xml	9.37812e-15
311	export	TAZ_model_2021-12-27_23.47.58.xml	2.8699e-15
312	diffusion	TAZ_model_2021-12-27_23.48.12.xml	8.16499
313	diffusion_phosph	TAZ_model_2021-12-27_23.48.12.xml	1.08025
314	phosphorylation	TAZ_model_2021-12-27_23.48.12.xml	0.313853
315	dephosporylation	TAZ_model_2021-12-27_23.48.12.xml	0.0202478
316	translation	TAZ_model_2021-12-27_23.48.12.xml	0.00546807
317	degradation	TAZ_model_2021-12-27_23.48.12.xml	0.00993141
318	import	TAZ_model_2021-12-27_23.48.12.xml	9.45524e-15
319	export	TAZ_model_2021-12-27_23.48.12.xml	5.45607e-15
320	diffusion	TAZ_model_2021-12-28_00.46.12.xml	6.97983
321	diffusion_phosph	TAZ_model_2021-12-28_00.46.12.xml	1.08104
322	phosphorylation	TAZ_model_2021-12-28_00.46.12.xml	0.142999
323	dephosporylation	TAZ_model_2021-12-28_00.46.12.xml	0.16168
324	translation	TAZ_model_2021-12-28_00.46.12.xml	0.00494617
325	degradation	TAZ_model_2021-12-28_00.46.12.xml	0.0098601
326	import	TAZ_model_2021-12-28_00.46.12.xml	9.13727e-15
327	export	TAZ_model_2021-12-28_00.46.12.xml	2.7014e-15
328	diffusion	TAZ_model_2021-12-28_00.53.58.xml	7.42709
329	diffusion_phosph	TAZ_model_2021-12-28_00.53.58.xml	1.03121
330	phosphorylation	TAZ_model_2021-12-28_00.53.58.xml	0.211816
331	dephosporylation	TAZ_model_2021-12-28_00.53.58.xml	0.0521106
332	translation	TAZ_model_2021-12-28_00.53.58.xml	0.00715678
333	degradation	TAZ_model_2021-12-28_00.53.58.xml	0.00921856
334	import	TAZ_model_2021-12-28_00.53.58.xml	9.40634e-15
335	export	TAZ_model_2021-12-28_00.53.58.xml	7.79918e-15
336	diffusion	TAZ_model_2021-12-28_00.55.15.xml	7.92354
337	diffusion_phosph	TAZ_model_2021-12-28_00.55.15.xml	1.10413
338	phosphorylation	TAZ_model_2021-12-28_00.55.15.xml	0.178279
339	dephosporylation	TAZ_model_2021-12-28_00.55.15.xml	0.241204
340	translation	TAZ_model_2021-12-28_00.55.15.xml	0.0046754
341	degradation	TAZ_model_2021-12-28_00.55.15.xml	0.00983713
342	import	TAZ_model_2021-12-28_00.55.15.xml	6.5593e-15
343	export	TAZ_model_2021-12-28_00.55.15.xml	5.3879e-15
344	diffusion	TAZ_model_2021-12-28_00.59.41.xml	7.62901
345	diffusion_phosph	TAZ_model_2021-12-28_00.59.41.xml	1.11587
346	phosphorylation	TAZ_model_2021-12-28_00.59.41.xml	0.311339
347	dephosporylation	TAZ_model_2021-12-28_00.59.41.xml	0.0569969
348	translation	TAZ_model_2021-12-28_00.59.41.xml	0.00532267
349	degradation	TAZ_model_2021-12-28_00.59.41.xml	0.0095333
350	import	TAZ_model_2021-12-28_00.59.41.xml	9.28271e-15
351	export	TAZ_model_2021-12-28_00.59.41.xml	4.41675e-15
352	diffusion	TAZ_model_2021-12-28_01.56.08.xml	7.17088
353	diffusion_phosph	TAZ_model_2021-12-28_01.56.08.xml	1.04388
354	phosphorylation	TAZ_model_2021-12-28_01.56.08.xml	0.210023
355	dephosporylation	TAZ_model_2021-12-28_01.56.08.xml	0.116257
356	translation	TAZ_model_2021-12-28_01.56.08.xml	0.0052004
357	degradation	TAZ_model_2021-12-28_01.56.08.xml	0.00999518
358	import	TAZ_model_2021-12-28_01.56.08.xml	5.42569e-15
359	export	TAZ_model_2021-12-28_01.56.08.xml	8.01009e-15
360	diffusion	TAZ_model_2021-12-28_02.05.16.xml	7.97602
361	diffusion_phosph	TAZ_model_2021-12-28_02.05.16.xml	1.03896
362	phosphorylation	TAZ_model_2021-12-28_02.05.16.xml	0.105541
363	dephosporylation	TAZ_model_2021-12-28_02.05.16.xml	0.262849
364	translation	TAZ_model_2021-12-28_02.05.16.xml	0.0031478
365	degradation	TAZ_model_2021-12-28_02.05.16.xml	0.00977991
366	import	TAZ_model_2021-12-28_02.05.16.xml	5.16979e-15
367	export	TAZ_model_2021-12-28_02.05.16.xml	5.70391e-15
368	diffusion	TAZ_model_2021-12-28_02.07.45.xml	8.22334
369	diffusion_phosph	TAZ_model_2021-12-28_02.07.45.xml	1.01265
370	phosphorylation	TAZ_model_2021-12-28_02.07.45.xml	0.264673
371	dephosporylation	TAZ_model_2021-12-28_02.07.45.xml	0.304682
372	translation	TAZ_model_2021-12-28_02.07.45.xml	0.00609617
373	degradation	TAZ_model_2021-12-28_02.07.45.xml	0.00952048
374	import	TAZ_model_2021-12-28_02.07.45.xml	6.69256e-15
375	export	TAZ_model_2021-12-28_02.07.45.xml	1.61484e-15
376	diffusion	TAZ_model_2021-12-28_02.13.41.xml	8.64327
377	diffusion_phosph	TAZ_model_2021-12-28_02.13.41.xml	1.03855
378	phosphorylation	TAZ_model_2021-12-28_02.13.41.xml	0.230815
379	dephosporylation	TAZ_model_2021-12-28_02.13.41.xml	0.243826
380	translation	TAZ_model_2021-12-28_02.13.41.xml	0.00470972
381	degradation	TAZ_model_2021-12-28_02.13.41.xml	0.00993126
382	import	TAZ_model_2021-12-28_02.13.41.xml	5.61097e-15
383	export	TAZ_model_2021-12-28_02.13.41.xml	6.2652e-15
384	diffusion	TAZ_model_2021-12-28_02.57.59.xml	6.54576
385	diffusion_phosph	TAZ_model_2021-12-28_02.57.59.xml	1.02501
386	phosphorylation	TAZ_model_2021-12-28_02.57.59.xml	0.294199
387	dephosporylation	TAZ_model_2021-12-28_02.57.59.xml	0.256795
388	translation	TAZ_model_2021-12-28_02.57.59.xml	0.00389949
389	degradation	TAZ_model_2021-12-28_02.57.59.xml	0.0093588
390	import	TAZ_model_2021-12-28_02.57.59.xml	9.94319e-15
391	export	TAZ_model_2021-12-28_02.57.59.xml	2.73005e-15
392	diffusion	TAZ_model_2021-12-28_03.18.33.xml	8.94535
393	diffusion_phosph	TAZ_model_2021-12-28_03.18.33.xml	1.13856
394	phosphorylation	TAZ_model_2021-12-28_03.18.33.xml	0.122414
395	dephosporylation	TAZ_model_2021-12-28_03.18.33.xml	0.224581
396	translation	TAZ_model_2021-12-28_03.18.33.xml	0.00408834
397	degradation	TAZ_model_2021-12-28_03.18.33.xml	0.00869241
398	import	TAZ_model_2021-12-28_03.18.33.xml	5.83728e-15
399	export	TAZ_model_2021-12-28_03.18.33.xml	5.03308e-15
400	diffusion	TAZ_model_2021-12-28_03.20.39.xml	8.50368
401	diffusion_phosph	TAZ_model_2021-12-28_03.20.39.xml	1.01204
402	phosphorylation	TAZ_model_2021-12-28_03.20.39.xml	0.290638
403	dephosporylation	TAZ_model_2021-12-28_03.20.39.xml	0.166579
404	translation	TAZ_model_2021-12-28_03.20.39.xml	0.00550718
405	degradation	TAZ_model_2021-12-28_03.20.39.xml	0.00907554
406	import	TAZ_model_2021-12-28_03.20.39.xml	9.97758e-15
407	export	TAZ_model_2021-12-28_03.20.39.xml	7.43106e-15
408	diffusion	TAZ_model_2021-12-28_03.26.54.xml	9.48629
409	diffusion_phosph	TAZ_model_2021-12-28_03.26.54.xml	1.15447
410	phosphorylation	TAZ_model_2021-12-28_03.26.54.xml	0.357748
411	dephosporylation	TAZ_model_2021-12-28_03.26.54.xml	0.0867191
412	translation	TAZ_model_2021-12-28_03.26.54.xml	0.00802164
413	degradation	TAZ_model_2021-12-28_03.26.54.xml	0.00971465
414	import	TAZ_model_2021-12-28_03.26.54.xml	9.81599e-15
415	export	TAZ_model_2021-12-28_03.26.54.xml	1.43357e-15
416	diffusion	TAZ_model_2021-12-28_04.04.24.xml	7.69802
417	diffusion_phosph	TAZ_model_2021-12-28_04.04.24.xml	1.05697
418	phosphorylation	TAZ_model_2021-12-28_04.04.24.xml	0.152533
419	dephosporylation	TAZ_model_2021-12-28_04.04.24.xml	0.337496
420	translation	TAZ_model_2021-12-28_04.04.24.xml	0.00683636
421	degradation	TAZ_model_2021-12-28_04.04.24.xml	0.00935788
422	import	TAZ_model_2021-12-28_04.04.24.xml	7.31447e-15
423	export	TAZ_model_2021-12-28_04.04.24.xml	9.64686e-15
424	diffusion	TAZ_model_2021-12-28_04.26.10.xml	7.17216
425	diffusion_phosph	TAZ_model_2021-12-28_04.26.10.xml	1.01832
426	phosphorylation	TAZ_model_2021-12-28_04.26.10.xml	0.192955
427	dephosporylation	TAZ_model_2021-12-28_04.26.10.xml	0.107512
428	translation	TAZ_model_2021-12-28_04.26.10.xml	0.00436376
429	degradation	TAZ_model_2021-12-28_04.26.10.xml	0.0093852
430	import	TAZ_model_2021-12-28_04.26.10.xml	5.27682e-15
431	export	TAZ_model_2021-12-28_04.26.10.xml	7.88477e-15
432	diffusion	TAZ_model_2021-12-28_04.28.47.xml	7.13898
433	diffusion_phosph	TAZ_model_2021-12-28_04.28.47.xml	1.04613
434	phosphorylation	TAZ_model_2021-12-28_04.28.47.xml	0.203159
435	dephosporylation	TAZ_model_2021-12-28_04.28.47.xml	0.208569
436	translation	TAZ_model_2021-12-28_04.28.47.xml	0.00679956
437	degradation	TAZ_model_2021-12-28_04.28.47.xml	0.00919148
438	import	TAZ_model_2021-12-28_04.28.47.xml	7.83888e-15
439	export	TAZ_model_2021-12-28_04.28.47.xml	4.31554e-15
440	diffusion	TAZ_model_2021-12-28_04.38.27.xml	8.68145
441	diffusion_phosph	TAZ_model_2021-12-28_04.38.27.xml	1.05903
442	phosphorylation	TAZ_model_2021-12-28_04.38.27.xml	0.0990011
443	dephosporylation	TAZ_model_2021-12-28_04.38.27.xml	0.0254801
444	translation	TAZ_model_2021-12-28_04.38.27.xml	0.00708007
445	degradation	TAZ_model_2021-12-28_04.38.27.xml	0.00878765
446	import	TAZ_model_2021-12-28_04.38.27.xml	3.12556e-15
447	export	TAZ_model_2021-12-28_04.38.27.xml	2.53668e-15
448	diffusion	TAZ_model_2021-12-28_05.18.28.xml	9.40056
449	diffusion_phosph	TAZ_model_2021-12-28_05.18.28.xml	1.13099
450	phosphorylation	TAZ_model_2021-12-28_05.18.28.xml	0.465672
451	dephosporylation	TAZ_model_2021-12-28_05.18.28.xml	0.138379
452	translation	TAZ_model_2021-12-28_05.18.28.xml	0.00707649
453	degradation	TAZ_model_2021-12-28_05.18.28.xml	0.0095285
454	import	TAZ_model_2021-12-28_05.18.28.xml	8.46729e-15
455	export	TAZ_model_2021-12-28_05.18.28.xml	5.14601e-16
456	diffusion	TAZ_model_2021-12-28_05.36.01.xml	9.64279
457	diffusion_phosph	TAZ_model_2021-12-28_05.36.01.xml	1.06293
458	phosphorylation	TAZ_model_2021-12-28_05.36.01.xml	0.378497
459	dephosporylation	TAZ_model_2021-12-28_05.36.01.xml	0.129072
460	translation	TAZ_model_2021-12-28_05.36.01.xml	0.00517322
461	degradation	TAZ_model_2021-12-28_05.36.01.xml	0.00944218
462	import	TAZ_model_2021-12-28_05.36.01.xml	8.73596e-15
463	export	TAZ_model_2021-12-28_05.36.01.xml	4.25803e-15
464	diffusion	TAZ_model_2021-12-28_05.37.37.xml	8.26462
465	diffusion_phosph	TAZ_model_2021-12-28_05.37.37.xml	1.01408
466	phosphorylation	TAZ_model_2021-12-28_05.37.37.xml	0.101609
467	dephosporylation	TAZ_model_2021-12-28_05.37.37.xml	0.0386712
468	translation	TAZ_model_2021-12-28_05.37.37.xml	0.0019472
469	degradation	TAZ_model_2021-12-28_05.37.37.xml	0.00719109
470	import	TAZ_model_2021-12-28_05.37.37.xml	9.3771e-15
471	export	TAZ_model_2021-12-28_05.37.37.xml	6.95769e-15
472	diffusion	TAZ_model_2021-12-28_05.50.00.xml	8.59758
473	diffusion_phosph	TAZ_model_2021-12-28_05.50.00.xml	1.11744
474	phosphorylation	TAZ_model_2021-12-28_05.50.00.xml	0.243236
475	dephosporylation	TAZ_model_2021-12-28_05.50.00.xml	0.0790296
476	translation	TAZ_model_2021-12-28_05.50.00.xml	0.00975156
477	degradation	TAZ_model_2021-12-28_05.50.00.xml	0.00989816
478	import	TAZ_model_2021-12-28_05.50.00.xml	9.74641e-15
479	export	TAZ_model_2021-12-28_05.50.00.xml	9.19541e-15
480	diffusion	TAZ_model_2021-12-28_06.35.14.xml	9.15838
481	diffusion_phosph	TAZ_model_2021-12-28_06.35.14.xml	1.01219
482	phosphorylation	TAZ_model_2021-12-28_06.35.14.xml	0.150365
483	dephosporylation	TAZ_model_2021-12-28_06.35.14.xml	0.0858556
484	translation	TAZ_model_2021-12-28_06.35.14.xml	0.00414469
485	degradation	TAZ_model_2021-12-28_06.35.14.xml	0.00929849
486	import	TAZ_model_2021-12-28_06.35.14.xml	6.41536e-15
487	export	TAZ_model_2021-12-28_06.35.14.xml	7.19288e-15
488	diffusion	TAZ_model_2021-12-28_06.38.05.xml	6.95874
489	diffusion_phosph	TAZ_model_2021-12-28_06.38.05.xml	1.04236
490	phosphorylation	TAZ_model_2021-12-28_06.38.05.xml	0.344321
491	dephosporylation	TAZ_model_2021-12-28_06.38.05.xml	0.0104845
492	translation	TAZ_model_2021-12-28_06.38.05.xml	0.00380839
493	degradation	TAZ_model_2021-12-28_06.38.05.xml	0.00933308
494	import	TAZ_model_2021-12-28_06.38.05.xml	9.98932e-15
495	export	TAZ_model_2021-12-28_06.38.05.xml	1.76131e-15
496	diffusion	TAZ_model_2021-12-28_06.49.20.xml	7.93902
497	diffusion_phosph	TAZ_model_2021-12-28_06.49.20.xml	1.02258
498	phosphorylation	TAZ_model_2021-12-28_06.49.20.xml	0.458321
499	dephosporylation	TAZ_model_2021-12-28_06.49.20.xml	0.103455
500	translation	TAZ_model_2021-12-28_06.49.20.xml	0.00156329
501	degradation	TAZ_model_2021-12-28_06.49.20.xml	0.00977024
502	import	TAZ_model_2021-12-28_06.49.20.xml	2.93232e-15
503	export	TAZ_model_2021-12-28_06.49.20.xml	6.75039e-16
504	diffusion	TAZ_model_2021-12-28_07.04.04.xml	9.14393
505	diffusion_phosph	TAZ_model_2021-12-28_07.04.04.xml	1.00732
506	phosphorylation	TAZ_model_2021-12-28_07.04.04.xml	0.102863
507	dephosporylation	TAZ_model_2021-12-28_07.04.04.xml	0.105178
508	translation	TAZ_model_2021-12-28_07.04.04.xml	0.0030932
509	degradation	TAZ_model_2021-12-28_07.04.04.xml	0.00979403
510	import	TAZ_model_2021-12-28_07.04.04.xml	9.58505e-15
511	export	TAZ_model_2021-12-28_07.04.04.xml	4.58766e-15
512	diffusion	TAZ_model_2021-12-28_07.38.26.xml	6.50904
513	diffusion_phosph	TAZ_model_2021-12-28_07.38.26.xml	1.0224
514	phosphorylation	TAZ_model_2021-12-28_07.38.26.xml	0.139453
515	dephosporylation	TAZ_model_2021-12-28_07.38.26.xml	0.334726
516	translation	TAZ_model_2021-12-28_07.38.26.xml	0.00563988
517	degradation	TAZ_model_2021-12-28_07.38.26.xml	0.00943404
518	import	TAZ_model_2021-12-28_07.38.26.xml	9.65713e-15
519	export	TAZ_model_2021-12-28_07.38.26.xml	8.13337e-15
520	diffusion	TAZ_model_2021-12-28_07.45.19.xml	8.28567
521	diffusion_phosph	TAZ_model_2021-12-28_07.45.19.xml	1.07758
522	phosphorylation	TAZ_model_2021-12-28_07.45.19.xml	0.444627
523	dephosporylation	TAZ_model_2021-12-28_07.45.19.xml	0.0781441
524	translation	TAZ_model_2021-12-28_07.45.19.xml	0.00546679
525	degradation	TAZ_model_2021-12-28_07.45.19.xml	0.00952903
526	import	TAZ_model_2021-12-28_07.45.19.xml	8.94575e-15
527	export	TAZ_model_2021-12-28_07.45.19.xml	2.0487e-15
528	diffusion	TAZ_model_2021-12-28_08.00.42.xml	8.01445
529	diffusion_phosph	TAZ_model_2021-12-28_08.00.42.xml	1.03635
530	phosphorylation	TAZ_model_2021-12-28_08.00.42.xml	0.191165
531	dephosporylation	TAZ_model_2021-12-28_08.00.42.xml	0.0125979
532	translation	TAZ_model_2021-12-28_08.00.42.xml	0.00521262
533	degradation	TAZ_model_2021-12-28_08.00.42.xml	0.00989349
534	import	TAZ_model_2021-12-28_08.00.42.xml	9.16372e-15
535	export	TAZ_model_2021-12-28_08.00.42.xml	1.27031e-15
536	diffusion	TAZ_model_2021-12-28_08.12.04.xml	9.06494
537	diffusion_phosph	TAZ_model_2021-12-28_08.12.04.xml	1.17504
538	phosphorylation	TAZ_model_2021-12-28_08.12.04.xml	0.228373
539	dephosporylation	TAZ_model_2021-12-28_08.12.04.xml	0.358291
540	translation	TAZ_model_2021-12-28_08.12.04.xml	0.00521612
541	degradation	TAZ_model_2021-12-28_08.12.04.xml	0.00994825
542	import	TAZ_model_2021-12-28_08.12.04.xml	4.32324e-15
543	export	TAZ_model_2021-12-28_08.12.04.xml	4.4781e-15
544	diffusion	TAZ_model_2021-12-28_08.46.16.xml	9.95749
545	diffusion_phosph	TAZ_model_2021-12-28_08.46.16.xml	1.01206
546	phosphorylation	TAZ_model_2021-12-28_08.46.16.xml	0.235775
547	dephosporylation	TAZ_model_2021-12-28_08.46.16.xml	0.174054
548	translation	TAZ_model_2021-12-28_08.46.16.xml	0.00865225
549	degradation	TAZ_model_2021-12-28_08.46.16.xml	0.00951068
550	import	TAZ_model_2021-12-28_08.46.16.xml	5.48481e-15
551	export	TAZ_model_2021-12-28_08.46.16.xml	5.98095e-15
552	diffusion	TAZ_model_2021-12-28_09.00.08.xml	9.18234
553	diffusion_phosph	TAZ_model_2021-12-28_09.00.08.xml	1.11083
554	phosphorylation	TAZ_model_2021-12-28_09.00.08.xml	0.169101
555	dephosporylation	TAZ_model_2021-12-28_09.00.08.xml	0.100178
556	translation	TAZ_model_2021-12-28_09.00.08.xml	0.00188803
557	degradation	TAZ_model_2021-12-28_09.00.08.xml	0.0084397
558	import	TAZ_model_2021-12-28_09.00.08.xml	9.42427e-15
559	export	TAZ_model_2021-12-28_09.00.08.xml	7.00799e-15
560	diffusion	TAZ_model_2021-12-28_09.10.40.xml	9.90196
561	diffusion_phosph	TAZ_model_2021-12-28_09.10.40.xml	1.04896
562	phosphorylation	TAZ_model_2021-12-28_09.10.40.xml	0.225893
563	dephosporylation	TAZ_model_2021-12-28_09.10.40.xml	0.0967739
564	translation	TAZ_model_2021-12-28_09.10.40.xml	0.00679742
565	degradation	TAZ_model_2021-12-28_09.10.40.xml	0.00965463
566	import	TAZ_model_2021-12-28_09.10.40.xml	9.67048e-15
567	export	TAZ_model_2021-12-28_09.10.40.xml	8.73208e-15
568	diffusion	TAZ_model_2021-12-28_09.18.31.xml	6.94951
569	diffusion_phosph	TAZ_model_2021-12-28_09.18.31.xml	1.0043
570	phosphorylation	TAZ_model_2021-12-28_09.18.31.xml	0.420369
571	dephosporylation	TAZ_model_2021-12-28_09.18.31.xml	0.0899046
572	translation	TAZ_model_2021-12-28_09.18.31.xml	0.00721608
573	degradation	TAZ_model_2021-12-28_09.18.31.xml	0.00981592
574	import	TAZ_model_2021-12-28_09.18.31.xml	7.33294e-15
575	export	TAZ_model_2021-12-28_09.18.31.xml	3.63174e-15
576	diffusion	TAZ_model_2021-12-28_10.02.33.xml	8.58081
577	diffusion_phosph	TAZ_model_2021-12-28_10.02.33.xml	1.08125
578	phosphorylation	TAZ_model_2021-12-28_10.02.33.xml	0.12171
579	dephosporylation	TAZ_model_2021-12-28_10.02.33.xml	0.128845
580	translation	TAZ_model_2021-12-28_10.02.33.xml	0.00443167
581	degradation	TAZ_model_2021-12-28_10.02.33.xml	0.00898263
582	import	TAZ_model_2021-12-28_10.02.33.xml	7.54122e-15
583	export	TAZ_model_2021-12-28_10.02.33.xml	7.25402e-15
584	diffusion	TAZ_model_2021-12-28_10.13.24.xml	8.50921
585	diffusion_phosph	TAZ_model_2021-12-28_10.13.24.xml	1.17273
586	phosphorylation	TAZ_model_2021-12-28_10.13.24.xml	0.361275
587	dephosporylation	TAZ_model_2021-12-28_10.13.24.xml	0.0936251
588	translation	TAZ_model_2021-12-28_10.13.24.xml	0.00319579
589	degradation	TAZ_model_2021-12-28_10.13.24.xml	0.00972792
590	import	TAZ_model_2021-12-28_10.13.24.xml	6.56729e-15
591	export	TAZ_model_2021-12-28_10.13.24.xml	8.32687e-16
592	diffusion	TAZ_model_2021-12-28_10.18.15.xml	7.38408
593	diffusion_phosph	TAZ_model_2021-12-28_10.18.15.xml	1.01669
594	phosphorylation	TAZ_model_2021-12-28_10.18.15.xml	0.260913
595	dephosporylation	TAZ_model_2021-12-28_10.18.15.xml	0.0928712
596	translation	TAZ_model_2021-12-28_10.18.15.xml	0.00784641
597	degradation	TAZ_model_2021-12-28_10.18.15.xml	0.00924695
598	import	TAZ_model_2021-12-28_10.18.15.xml	4.2295e-15
599	export	TAZ_model_2021-12-28_10.18.15.xml	7.22429e-15
600	diffusion	TAZ_model_2021-12-28_10.30.46.xml	8.7846
601	diffusion_phosph	TAZ_model_2021-12-28_10.30.46.xml	1.01967
602	phosphorylation	TAZ_model_2021-12-28_10.30.46.xml	0.121885
603	dephosporylation	TAZ_model_2021-12-28_10.30.46.xml	0.418297
604	translation	TAZ_model_2021-12-28_10.30.46.xml	0.00366468
605	degradation	TAZ_model_2021-12-28_10.30.46.xml	0.0096627
606	import	TAZ_model_2021-12-28_10.30.46.xml	6.02085e-15
607	export	TAZ_model_2021-12-28_10.30.46.xml	6.30594e-15
608	diffusion	TAZ_model_2021-12-28_11.05.33.xml	6.5588
609	diffusion_phosph	TAZ_model_2021-12-28_11.05.33.xml	1.06734
610	phosphorylation	TAZ_model_2021-12-28_11.05.33.xml	0.419021
611	dephosporylation	TAZ_model_2021-12-28_11.05.33.xml	0.199168
612	translation	TAZ_model_2021-12-28_11.05.33.xml	0.0052965
613	degradation	TAZ_model_2021-12-28_11.05.33.xml	0.00992462
614	import	TAZ_model_2021-12-28_11.05.33.xml	7.24345e-15
615	export	TAZ_model_2021-12-28_11.05.33.xml	1.45594e-15
616	diffusion	TAZ_model_2021-12-28_11.18.53.xml	6.48034
617	diffusion_phosph	TAZ_model_2021-12-28_11.18.53.xml	1.00655
618	phosphorylation	TAZ_model_2021-12-28_11.18.53.xml	0.246961
619	dephosporylation	TAZ_model_2021-12-28_11.18.53.xml	0.127942
620	translation	TAZ_model_2021-12-28_11.18.53.xml	0.00857493
621	degradation	TAZ_model_2021-12-28_11.18.53.xml	0.00941408
622	import	TAZ_model_2021-12-28_11.18.53.xml	7.12908e-15
623	export	TAZ_model_2021-12-28_11.18.53.xml	7.21554e-15
624	diffusion	TAZ_model_2021-12-28_11.24.38.xml	8.66964
625	diffusion_phosph	TAZ_model_2021-12-28_11.24.38.xml	1.05651
626	phosphorylation	TAZ_model_2021-12-28_11.24.38.xml	0.123895
627	dephosporylation	TAZ_model_2021-12-28_11.24.38.xml	0.246849
628	translation	TAZ_model_2021-12-28_11.24.38.xml	0.00852016
629	degradation	TAZ_model_2021-12-28_11.24.38.xml	0.00814542
630	import	TAZ_model_2021-12-28_11.24.38.xml	6.66028e-15
631	export	TAZ_model_2021-12-28_11.24.38.xml	8.40417e-15
632	diffusion	TAZ_model_2021-12-28_11.40.59.xml	7.61358
633	diffusion_phosph	TAZ_model_2021-12-28_11.40.59.xml	1.02987
634	phosphorylation	TAZ_model_2021-12-28_11.40.59.xml	0.35859
635	dephosporylation	TAZ_model_2021-12-28_11.40.59.xml	0.0596011
636	translation	TAZ_model_2021-12-28_11.40.59.xml	0.00489357
637	degradation	TAZ_model_2021-12-28_11.40.59.xml	0.00985964
638	import	TAZ_model_2021-12-28_11.40.59.xml	5.56563e-15
639	export	TAZ_model_2021-12-28_11.40.59.xml	1.56612e-15
640	diffusion	TAZ_model_2021-12-28_12.16.33.xml	9.11399
641	diffusion_phosph	TAZ_model_2021-12-28_12.16.33.xml	1.11384
642	phosphorylation	TAZ_model_2021-12-28_12.16.33.xml	0.316126
643	dephosporylation	TAZ_model_2021-12-28_12.16.33.xml	0.0659916
644	translation	TAZ_model_2021-12-28_12.16.33.xml	0.00293057
645	degradation	TAZ_model_2021-12-28_12.16.33.xml	0.00974869
646	import	TAZ_model_2021-12-28_12.16.33.xml	9.38768e-15
647	export	TAZ_model_2021-12-28_12.16.33.xml	6.08706e-15
648	diffusion	TAZ_model_2021-12-28_12.28.09.xml	7.92316
649	diffusion_phosph	TAZ_model_2021-12-28_12.28.09.xml	1.01789
650	phosphorylation	TAZ_model_2021-12-28_12.28.09.xml	0.166105
651	dephosporylation	TAZ_model_2021-12-28_12.28.09.xml	0.263489
652	translation	TAZ_model_2021-12-28_12.28.09.xml	0.0055803
653	degradation	TAZ_model_2021-12-28_12.28.09.xml	0.00809547
654	import	TAZ_model_2021-12-28_12.28.09.xml	4.25896e-15
655	export	TAZ_model_2021-12-28_12.28.09.xml	8.79144e-15
656	diffusion	TAZ_model_2021-12-28_12.40.14.xml	9.19137
657	diffusion_phosph	TAZ_model_2021-12-28_12.40.14.xml	1.05171
658	phosphorylation	TAZ_model_2021-12-28_12.40.14.xml	0.262068
659	dephosporylation	TAZ_model_2021-12-28_12.40.14.xml	0.0201342
660	translation	TAZ_model_2021-12-28_12.40.14.xml	0.00850369
661	degradation	TAZ_model_2021-12-28_12.40.14.xml	0.00941955
662	import	TAZ_model_2021-12-28_12.40.14.xml	7.82801e-15
663	export	TAZ_model_2021-12-28_12.40.14.xml	5.6498e-16
664	diffusion	TAZ_model_2021-12-28_12.55.15.xml	7.42652
665	diffusion_phosph	TAZ_model_2021-12-28_12.55.15.xml	1.02545
666	phosphorylation	TAZ_model_2021-12-28_12.55.15.xml	0.472243
667	dephosporylation	TAZ_model_2021-12-28_12.55.15.xml	0.264538
668	translation	TAZ_model_2021-12-28_12.55.15.xml	0.00344894
669	degradation	TAZ_model_2021-12-28_12.55.15.xml	0.00997365
670	import	TAZ_model_2021-12-28_12.55.15.xml	6.7694e-15
671	export	TAZ_model_2021-12-28_12.55.15.xml	1.97718e-15
672	diffusion	TAZ_model_2021-12-28_13.26.37.xml	7.15607
673	diffusion_phosph	TAZ_model_2021-12-28_13.26.37.xml	1.02636
674	phosphorylation	TAZ_model_2021-12-28_13.26.37.xml	0.301083
675	dephosporylation	TAZ_model_2021-12-28_13.26.37.xml	0.089106
676	translation	TAZ_model_2021-12-28_13.26.37.xml	0.0016724
677	degradation	TAZ_model_2021-12-28_13.26.37.xml	0.00995657
678	import	TAZ_model_2021-12-28_13.26.37.xml	4.50474e-15
679	export	TAZ_model_2021-12-28_13.26.37.xml	1.67071e-15
680	diffusion	TAZ_model_2021-12-28_13.44.36.xml	6.66792
681	diffusion_phosph	TAZ_model_2021-12-28_13.44.36.xml	1.03927
682	phosphorylation	TAZ_model_2021-12-28_13.44.36.xml	0.284612
683	dephosporylation	TAZ_model_2021-12-28_13.44.36.xml	0.238483
684	translation	TAZ_model_2021-12-28_13.44.36.xml	0.00369952
685	degradation	TAZ_model_2021-12-28_13.44.36.xml	0.0097674
686	import	TAZ_model_2021-12-28_13.44.36.xml	9.62893e-15
687	export	TAZ_model_2021-12-28_13.44.36.xml	3.64211e-15
688	diffusion	TAZ_model_2021-12-28_13.46.11.xml	9.43725
689	diffusion_phosph	TAZ_model_2021-12-28_13.46.11.xml	1.06801
690	phosphorylation	TAZ_model_2021-12-28_13.46.11.xml	0.156617
691	dephosporylation	TAZ_model_2021-12-28_13.46.11.xml	0.373936
692	translation	TAZ_model_2021-12-28_13.46.11.xml	0.00800413
693	degradation	TAZ_model_2021-12-28_13.46.11.xml	0.00858795
694	import	TAZ_model_2021-12-28_13.46.11.xml	8.97271e-15
695	export	TAZ_model_2021-12-28_13.46.11.xml	1.621e-15
696	diffusion	TAZ_model_2021-12-28_14.05.16.xml	7.4537
697	diffusion_phosph	TAZ_model_2021-12-28_14.05.16.xml	1.03738
698	phosphorylation	TAZ_model_2021-12-28_14.05.16.xml	0.158639
699	dephosporylation	TAZ_model_2021-12-28_14.05.16.xml	0.0689859
700	translation	TAZ_model_2021-12-28_14.05.16.xml	0.00335989
701	degradation	TAZ_model_2021-12-28_14.05.16.xml	0.00986463
702	import	TAZ_model_2021-12-28_14.05.16.xml	8.55513e-15
703	export	TAZ_model_2021-12-28_14.05.16.xml	5.13191e-15
704	diffusion	TAZ_model_2021-12-28_14.25.48.xml	5.52761
705	diffusion_phosph	TAZ_model_2021-12-28_14.25.48.xml	1.00734
706	phosphorylation	TAZ_model_2021-12-28_14.25.48.xml	0.246069
707	dephosporylation	TAZ_model_2021-12-28_14.25.48.xml	0.223297
708	translation	TAZ_model_2021-12-28_14.25.48.xml	0.00299992
709	degradation	TAZ_model_2021-12-28_14.25.48.xml	0.0099272
710	import	TAZ_model_2021-12-28_14.25.48.xml	8.83769e-15
711	export	TAZ_model_2021-12-28_14.25.48.xml	3.46601e-15
712	diffusion	TAZ_model_2021-12-28_14.55.07.xml	7.86437
713	diffusion_phosph	TAZ_model_2021-12-28_14.55.07.xml	1.06056
714	phosphorylation	TAZ_model_2021-12-28_14.55.07.xml	0.128935
715	dephosporylation	TAZ_model_2021-12-28_14.55.07.xml	0.296506
716	translation	TAZ_model_2021-12-28_14.55.07.xml	0.0068419
717	degradation	TAZ_model_2021-12-28_14.55.07.xml	0.00952869
718	import	TAZ_model_2021-12-28_14.55.07.xml	1.69658e-15
719	export	TAZ_model_2021-12-28_14.55.07.xml	9.97795e-15
720	diffusion	TAZ_model_2021-12-28_14.58.29.xml	8.57633
721	diffusion_phosph	TAZ_model_2021-12-28_14.58.29.xml	1.03424
722	phosphorylation	TAZ_model_2021-12-28_14.58.29.xml	0.16684
723	dephosporylation	TAZ_model_2021-12-28_14.58.29.xml	0.340091
724	translation	TAZ_model_2021-12-28_14.58.29.xml	0.00211096
725	degradation	TAZ_model_2021-12-28_14.58.29.xml	0.00991474
726	import	TAZ_model_2021-12-28_14.58.29.xml	7.89329e-15
727	export	TAZ_model_2021-12-28_14.58.29.xml	8.17954e-15
728	diffusion	TAZ_model_2021-12-28_15.02.33.xml	6.23826
729	diffusion_phosph	TAZ_model_2021-12-28_15.02.33.xml	1.03501
730	phosphorylation	TAZ_model_2021-12-28_15.02.33.xml	0.183219
731	dephosporylation	TAZ_model_2021-12-28_15.02.33.xml	0.117794
732	translation	TAZ_model_2021-12-28_15.02.33.xml	0.00735526
733	degradation	TAZ_model_2021-12-28_15.02.33.xml	0.00975685
734	import	TAZ_model_2021-12-28_15.02.33.xml	7.09871e-15
735	export	TAZ_model_2021-12-28_15.02.33.xml	9.23621e-15
736	diffusion	TAZ_model_2021-12-28_15.06.40.xml	8.77455
737	diffusion_phosph	TAZ_model_2021-12-28_15.06.40.xml	1.13664
738	phosphorylation	TAZ_model_2021-12-28_15.06.40.xml	0.290275
739	dephosporylation	TAZ_model_2021-12-28_15.06.40.xml	0.0484013
740	translation	TAZ_model_2021-12-28_15.06.40.xml	0.00155999
741	degradation	TAZ_model_2021-12-28_15.06.40.xml	0.00950736
742	import	TAZ_model_2021-12-28_15.06.40.xml	4.6523e-15
743	export	TAZ_model_2021-12-28_15.06.40.xml	1.7038e-15
744	diffusion	TAZ_model_2021-12-28_15.07.15.xml	9.29031
745	diffusion_phosph	TAZ_model_2021-12-28_15.07.15.xml	1.01714
746	phosphorylation	TAZ_model_2021-12-28_15.07.15.xml	0.27983
747	dephosporylation	TAZ_model_2021-12-28_15.07.15.xml	0.141047
748	translation	TAZ_model_2021-12-28_15.07.15.xml	0.00607208
749	degradation	TAZ_model_2021-12-28_15.07.15.xml	0.00984693
750	import	TAZ_model_2021-12-28_15.07.15.xml	8.19224e-15
751	export	TAZ_model_2021-12-28_15.07.15.xml	3.13092e-15
752	diffusion	TAZ_model_2021-12-28_15.15.34.xml	7.6883
753	diffusion_phosph	TAZ_model_2021-12-28_15.15.34.xml	1.05662
754	phosphorylation	TAZ_model_2021-12-28_15.15.34.xml	0.101242
755	dephosporylation	TAZ_model_2021-12-28_15.15.34.xml	0.183396
756	translation	TAZ_model_2021-12-28_15.15.34.xml	0.00387829
757	degradation	TAZ_model_2021-12-28_15.15.34.xml	0.00925497
758	import	TAZ_model_2021-12-28_15.15.34.xml	8.65005e-15
759	export	TAZ_model_2021-12-28_15.15.34.xml	7.78302e-15
760	diffusion	TAZ_model_2021-12-28_15.27.29.xml	7.5943
761	diffusion_phosph	TAZ_model_2021-12-28_15.27.29.xml	1.03603
762	phosphorylation	TAZ_model_2021-12-28_15.27.29.xml	0.280752
763	dephosporylation	TAZ_model_2021-12-28_15.27.29.xml	0.142572
764	translation	TAZ_model_2021-12-28_15.27.29.xml	0.00748517
765	degradation	TAZ_model_2021-12-28_15.27.29.xml	0.00995121
766	import	TAZ_model_2021-12-28_15.27.29.xml	7.33276e-15
767	export	TAZ_model_2021-12-28_15.27.29.xml	7.26564e-15
768	diffusion	TAZ_model_2021-12-28_15.40.21.xml	8.99593
769	diffusion_phosph	TAZ_model_2021-12-28_15.40.21.xml	1.02066
770	phosphorylation	TAZ_model_2021-12-28_15.40.21.xml	0.464759
771	dephosporylation	TAZ_model_2021-12-28_15.40.21.xml	0.0331263
772	translation	TAZ_model_2021-12-28_15.40.21.xml	0.00441912
773	degradation	TAZ_model_2021-12-28_15.40.21.xml	0.00880581
774	import	TAZ_model_2021-12-28_15.40.21.xml	7.75666e-15
775	export	TAZ_model_2021-12-28_15.40.21.xml	4.66548e-16
776	diffusion	TAZ_model_2021-12-28_15.47.47.xml	7.5788
777	diffusion_phosph	TAZ_model_2021-12-28_15.47.47.xml	1.02268
778	phosphorylation	TAZ_model_2021-12-28_15.47.47.xml	0.126128
779	dephosporylation	TAZ_model_2021-12-28_15.47.47.xml	0.209829
780	translation	TAZ_model_2021-12-28_15.47.47.xml	0.00348531
781	degradation	TAZ_model_2021-12-28_15.47.47.xml	0.00982001
782	import	TAZ_model_2021-12-28_15.47.47.xml	5.1649e-15
783	export	TAZ_model_2021-12-28_15.47.47.xml	9.9142e-15
784	diffusion	TAZ_model_2021-12-28_15.51.29.xml	6.44918
785	diffusion_phosph	TAZ_model_2021-12-28_15.51.29.xml	1.02167
786	phosphorylation	TAZ_model_2021-12-28_15.51.29.xml	0.294708
787	dephosporylation	TAZ_model_2021-12-28_15.51.29.xml	0.10656
788	translation	TAZ_model_2021-12-28_15.51.29.xml	0.00438368
789	degradation	TAZ_model_2021-12-28_15.51.29.xml	0.00999113
790	import	TAZ_model_2021-12-28_15.51.29.xml	6.55653e-15
791	export	TAZ_model_2021-12-28_15.51.29.xml	4.41412e-15
792	diffusion	TAZ_model_2021-12-28_15.56.24.xml	9.38462
793	diffusion_phosph	TAZ_model_2021-12-28_15.56.24.xml	1.02443
794	phosphorylation	TAZ_model_2021-12-28_15.56.24.xml	0.324395
795	dephosporylation	TAZ_model_2021-12-28_15.56.24.xml	0.0974573
796	translation	TAZ_model_2021-12-28_15.56.24.xml	0.00476716
797	degradation	TAZ_model_2021-12-28_15.56.24.xml	0.00992073
798	import	TAZ_model_2021-12-28_15.56.24.xml	9.64355e-15
799	export	TAZ_model_2021-12-28_15.56.24.xml	7.0958e-15
800	diffusion	TAZ_model_2021-12-28_16.34.53.xml	8.77805
801	diffusion_phosph	TAZ_model_2021-12-28_16.34.53.xml	1.03454
802	phosphorylation	TAZ_model_2021-12-28_16.34.53.xml	0.259871
803	dephosporylation	TAZ_model_2021-12-28_16.34.53.xml	0.0373831
804	translation	TAZ_model_2021-12-28_16.34.53.xml	0.00739847
805	degradation	TAZ_model_2021-12-28_16.34.53.xml	0.00918718
806	import	TAZ_model_2021-12-28_16.34.53.xml	7.29588e-15
807	export	TAZ_model_2021-12-28_16.34.53.xml	2.34395e-15
808	diffusion	TAZ_model_2021-12-28_16.38.23.xml	7.85933
809	diffusion_phosph	TAZ_model_2021-12-28_16.38.23.xml	1.07078
810	phosphorylation	TAZ_model_2021-12-28_16.38.23.xml	0.14898
811	dephosporylation	TAZ_model_2021-12-28_16.38.23.xml	0.0610963
812	translation	TAZ_model_2021-12-28_16.38.23.xml	0.00703892
813	degradation	TAZ_model_2021-12-28_16.38.23.xml	0.00975089
814	import	TAZ_model_2021-12-28_16.38.23.xml	6.45059e-15
815	export	TAZ_model_2021-12-28_16.38.23.xml	9.27592e-15
816	diffusion	TAZ_model_2021-12-28_16.41.52.xml	8.59259
817	diffusion_phosph	TAZ_model_2021-12-28_16.41.52.xml	1.05781
818	phosphorylation	TAZ_model_2021-12-28_16.41.52.xml	0.157192
819	dephosporylation	TAZ_model_2021-12-28_16.41.52.xml	0.392354
820	translation	TAZ_model_2021-12-28_16.41.52.xml	0.00845214
821	degradation	TAZ_model_2021-12-28_16.41.52.xml	0.00943442
822	import	TAZ_model_2021-12-28_16.41.52.xml	6.93418e-15
823	export	TAZ_model_2021-12-28_16.41.52.xml	7.89107e-15
824	diffusion	TAZ_model_2021-12-28_16.43.02.xml	8.22279
825	diffusion_phosph	TAZ_model_2021-12-28_16.43.02.xml	1.03411
826	phosphorylation	TAZ_model_2021-12-28_16.43.02.xml	0.221649
827	dephosporylation	TAZ_model_2021-12-28_16.43.02.xml	0.174513
828	translation	TAZ_model_2021-12-28_16.43.02.xml	0.00529327
829	degradation	TAZ_model_2021-12-28_16.43.02.xml	0.00894876
830	import	TAZ_model_2021-12-28_16.43.02.xml	8.0287e-15
831	export	TAZ_model_2021-12-28_16.43.02.xml	1.7453e-15
832	diffusion	TAZ_model_2021-12-28_17.16.13.xml	7.21713
833	diffusion_phosph	TAZ_model_2021-12-28_17.16.13.xml	1.01468
834	phosphorylation	TAZ_model_2021-12-28_17.16.13.xml	0.138168
835	dephosporylation	TAZ_model_2021-12-28_17.16.13.xml	0.249283
836	translation	TAZ_model_2021-12-28_17.16.13.xml	0.00313382
837	degradation	TAZ_model_2021-12-28_17.16.13.xml	0.00993619
838	import	TAZ_model_2021-12-28_17.16.13.xml	6.33708e-15
839	export	TAZ_model_2021-12-28_17.16.13.xml	7.00222e-15
840	diffusion	TAZ_model_2021-12-28_17.22.06.xml	7.1958
841	diffusion_phosph	TAZ_model_2021-12-28_17.22.06.xml	1.06622
842	phosphorylation	TAZ_model_2021-12-28_17.22.06.xml	0.232885
843	dephosporylation	TAZ_model_2021-12-28_17.22.06.xml	0.143943
844	translation	TAZ_model_2021-12-28_17.22.06.xml	0.00210391
845	degradation	TAZ_model_2021-12-28_17.22.06.xml	0.00961659
846	import	TAZ_model_2021-12-28_17.22.06.xml	5.54167e-15
847	export	TAZ_model_2021-12-28_17.22.06.xml	2.50309e-15
848	diffusion	TAZ_model_2021-12-28_17.27.39.xml	9.50054
849	diffusion_phosph	TAZ_model_2021-12-28_17.27.39.xml	1.13999
850	phosphorylation	TAZ_model_2021-12-28_17.27.39.xml	0.405315
851	dephosporylation	TAZ_model_2021-12-28_17.27.39.xml	0.135593
852	translation	TAZ_model_2021-12-28_17.27.39.xml	0.00465736
853	degradation	TAZ_model_2021-12-28_17.27.39.xml	0.0097283
854	import	TAZ_model_2021-12-28_17.27.39.xml	9.43637e-15
855	export	TAZ_model_2021-12-28_17.27.39.xml	6.7352e-15
856	diffusion	TAZ_model_2021-12-28_17.52.14.xml	8.43052
857	diffusion_phosph	TAZ_model_2021-12-28_17.52.14.xml	1.06878
858	phosphorylation	TAZ_model_2021-12-28_17.52.14.xml	0.157197
859	dephosporylation	TAZ_model_2021-12-28_17.52.14.xml	0.357985
860	translation	TAZ_model_2021-12-28_17.52.14.xml	0.00620958
861	degradation	TAZ_model_2021-12-28_17.52.14.xml	0.00877108
862	import	TAZ_model_2021-12-28_17.52.14.xml	7.20343e-15
863	export	TAZ_model_2021-12-28_17.52.14.xml	8.41171e-15
864	diffusion	TAZ_model_2021-12-28_18.01.51.xml	7.84736
865	diffusion_phosph	TAZ_model_2021-12-28_18.01.51.xml	1.00161
866	phosphorylation	TAZ_model_2021-12-28_18.01.51.xml	0.373663
867	dephosporylation	TAZ_model_2021-12-28_18.01.51.xml	0.0189887
868	translation	TAZ_model_2021-12-28_18.01.51.xml	0.00511959
869	degradation	TAZ_model_2021-12-28_18.01.51.xml	0.00977443
870	import	TAZ_model_2021-12-28_18.01.51.xml	2.61302e-15
871	export	TAZ_model_2021-12-28_18.01.51.xml	5.44223e-15
872	diffusion	TAZ_model_2021-12-28_18.07.52.xml	7.63405
873	diffusion_phosph	TAZ_model_2021-12-28_18.07.52.xml	1.03054
874	phosphorylation	TAZ_model_2021-12-28_18.07.52.xml	0.370523
875	dephosporylation	TAZ_model_2021-12-28_18.07.52.xml	0.138386
876	translation	TAZ_model_2021-12-28_18.07.52.xml	0.00834875
877	degradation	TAZ_model_2021-12-28_18.07.52.xml	0.00971355
878	import	TAZ_model_2021-12-28_18.07.52.xml	3.71421e-15
879	export	TAZ_model_2021-12-28_18.07.52.xml	1.2191e-15
880	diffusion	TAZ_model_2021-12-28_18.13.10.xml	7.87261
881	diffusion_phosph	TAZ_model_2021-12-28_18.13.10.xml	1.05195
882	phosphorylation	TAZ_model_2021-12-28_18.13.10.xml	0.389281
883	dephosporylation	TAZ_model_2021-12-28_18.13.10.xml	0.0364157
884	translation	TAZ_model_2021-12-28_18.13.10.xml	0.00561202
885	degradation	TAZ_model_2021-12-28_18.13.10.xml	0.00998775
886	import	TAZ_model_2021-12-28_18.13.10.xml	8.53246e-15
887	export	TAZ_model_2021-12-28_18.13.10.xml	6.78956e-15
888	diffusion	TAZ_model_2021-12-28_18.51.43.xml	8.6117
889	diffusion_phosph	TAZ_model_2021-12-28_18.51.43.xml	1.10609
890	phosphorylation	TAZ_model_2021-12-28_18.51.43.xml	0.150024
891	dephosporylation	TAZ_model_2021-12-28_18.51.43.xml	0.285748
892	translation	TAZ_model_2021-12-28_18.51.43.xml	0.00345542
893	degradation	TAZ_model_2021-12-28_18.51.43.xml	0.00994767
894	import	TAZ_model_2021-12-28_18.51.43.xml	9.45578e-15
895	export	TAZ_model_2021-12-28_18.51.43.xml	7.3359e-15
896	diffusion	TAZ_model_2021-12-28_18.53.56.xml	8.43312
897	diffusion_phosph	TAZ_model_2021-12-28_18.53.56.xml	1.18513
898	phosphorylation	TAZ_model_2021-12-28_18.53.56.xml	0.144125
899	dephosporylation	TAZ_model_2021-12-28_18.53.56.xml	0.375024
900	translation	TAZ_model_2021-12-28_18.53.56.xml	0.00448687
901	degradation	TAZ_model_2021-12-28_18.53.56.xml	0.00953199
902	import	TAZ_model_2021-12-28_18.53.56.xml	8.74773e-15
903	export	TAZ_model_2021-12-28_18.53.56.xml	8.73e-15
904	diffusion	TAZ_model_2021-12-28_18.58.57.xml	7.78985
905	diffusion_phosph	TAZ_model_2021-12-28_18.58.57.xml	1.05615
906	phosphorylation	TAZ_model_2021-12-28_18.58.57.xml	0.292926
907	dephosporylation	TAZ_model_2021-12-28_18.58.57.xml	0.217996
908	translation	TAZ_model_2021-12-28_18.58.57.xml	0.00448911
909	degradation	TAZ_model_2021-12-28_18.58.57.xml	0.00972283
910	import	TAZ_model_2021-12-28_18.58.57.xml	5.06425e-15
911	export	TAZ_model_2021-12-28_18.58.57.xml	1.62784e-15
912	diffusion	TAZ_model_2021-12-28_19.06.53.xml	8.91425
913	diffusion_phosph	TAZ_model_2021-12-28_19.06.53.xml	1.08188
914	phosphorylation	TAZ_model_2021-12-28_19.06.53.xml	0.138739
915	dephosporylation	TAZ_model_2021-12-28_19.06.53.xml	0.319358
916	translation	TAZ_model_2021-12-28_19.06.53.xml	0.00581225
917	degradation	TAZ_model_2021-12-28_19.06.53.xml	0.00851849
918	import	TAZ_model_2021-12-28_19.06.53.xml	9.52553e-15
919	export	TAZ_model_2021-12-28_19.06.53.xml	4.77644e-15
920	diffusion	TAZ_model_2021-12-28_19.41.03.xml	9.16056
921	diffusion_phosph	TAZ_model_2021-12-28_19.41.03.xml	1.05114
922	phosphorylation	TAZ_model_2021-12-28_19.41.03.xml	0.145069
923	dephosporylation	TAZ_model_2021-12-28_19.41.03.xml	0.0702732
924	translation	TAZ_model_2021-12-28_19.41.03.xml	0.00744322
925	degradation	TAZ_model_2021-12-28_19.41.03.xml	0.00967316
926	import	TAZ_model_2021-12-28_19.41.03.xml	8.60983e-15
927	export	TAZ_model_2021-12-28_19.41.03.xml	4.74728e-15
928	diffusion	TAZ_model_2021-12-28_19.41.10.xml	8.2449
929	diffusion_phosph	TAZ_model_2021-12-28_19.41.10.xml	1.07532
930	phosphorylation	TAZ_model_2021-12-28_19.41.10.xml	0.130233
931	dephosporylation	TAZ_model_2021-12-28_19.41.10.xml	0.17635
932	translation	TAZ_model_2021-12-28_19.41.10.xml	0.00385575
933	degradation	TAZ_model_2021-12-28_19.41.10.xml	0.00908321
934	import	TAZ_model_2021-12-28_19.41.10.xml	5.81686e-15
935	export	TAZ_model_2021-12-28_19.41.10.xml	4.4501e-15
936	diffusion	TAZ_model_2021-12-28_19.43.20.xml	7.25692
937	diffusion_phosph	TAZ_model_2021-12-28_19.43.20.xml	1.04559
938	phosphorylation	TAZ_model_2021-12-28_19.43.20.xml	0.288312
939	dephosporylation	TAZ_model_2021-12-28_19.43.20.xml	0.247325
940	translation	TAZ_model_2021-12-28_19.43.20.xml	0.00784404
941	degradation	TAZ_model_2021-12-28_19.43.20.xml	0.00978218
942	import	TAZ_model_2021-12-28_19.43.20.xml	9.6057e-15
943	export	TAZ_model_2021-12-28_19.43.20.xml	4.22335e-15
944	diffusion	TAZ_model_2021-12-28_20.20.25.xml	6.32897
945	diffusion_phosph	TAZ_model_2021-12-28_20.20.25.xml	1.03899
946	phosphorylation	TAZ_model_2021-12-28_20.20.25.xml	0.384551
947	dephosporylation	TAZ_model_2021-12-28_20.20.25.xml	0.341739
948	translation	TAZ_model_2021-12-28_20.20.25.xml	0.00512579
949	degradation	TAZ_model_2021-12-28_20.20.25.xml	0.00965725
950	import	TAZ_model_2021-12-28_20.20.25.xml	7.62582e-15
951	export	TAZ_model_2021-12-28_20.20.25.xml	9.25962e-16
952	diffusion	TAZ_model_2021-12-28_20.22.06.xml	6.68552
953	diffusion_phosph	TAZ_model_2021-12-28_20.22.06.xml	1.06974
954	phosphorylation	TAZ_model_2021-12-28_20.22.06.xml	0.305155
955	dephosporylation	TAZ_model_2021-12-28_20.22.06.xml	0.280924
956	translation	TAZ_model_2021-12-28_20.22.06.xml	0.00790364
957	degradation	TAZ_model_2021-12-28_20.22.06.xml	0.00987528
958	import	TAZ_model_2021-12-28_20.22.06.xml	9.57168e-15
959	export	TAZ_model_2021-12-28_20.22.06.xml	7.72317e-15
960	diffusion	TAZ_model_2021-12-28_20.22.49.xml	9.47133
961	diffusion_phosph	TAZ_model_2021-12-28_20.22.49.xml	1.02844
962	phosphorylation	TAZ_model_2021-12-28_20.22.49.xml	0.176794
963	dephosporylation	TAZ_model_2021-12-28_20.22.49.xml	0.120242
964	translation	TAZ_model_2021-12-28_20.22.49.xml	0.00767723
965	degradation	TAZ_model_2021-12-28_20.22.49.xml	0.00887597
966	import	TAZ_model_2021-12-28_20.22.49.xml	6.65794e-15
967	export	TAZ_model_2021-12-28_20.22.49.xml	5.50666e-15
968	diffusion	TAZ_model_2021-12-28_20.31.57.xml	8.57401
969	diffusion_phosph	TAZ_model_2021-12-28_20.31.57.xml	1.05778
970	phosphorylation	TAZ_model_2021-12-28_20.31.57.xml	0.402676
971	dephosporylation	TAZ_model_2021-12-28_20.31.57.xml	0.0504588
972	translation	TAZ_model_2021-12-28_20.31.57.xml	0.00782953
973	degradation	TAZ_model_2021-12-28_20.31.57.xml	0.0087731
974	import	TAZ_model_2021-12-28_20.31.57.xml	7.01809e-15
975	export	TAZ_model_2021-12-28_20.31.57.xml	4.85031e-16
976	diffusion	TAZ_model_2021-12-28_21.04.46.xml	7.774
977	diffusion_phosph	TAZ_model_2021-12-28_21.04.46.xml	1.0569
978	phosphorylation	TAZ_model_2021-12-28_21.04.46.xml	0.213261
979	dephosporylation	TAZ_model_2021-12-28_21.04.46.xml	0.0623683
980	translation	TAZ_model_2021-12-28_21.04.46.xml	0.00306431
981	degradation	TAZ_model_2021-12-28_21.04.46.xml	0.00999897
982	import	TAZ_model_2021-12-28_21.04.46.xml	9.85476e-15
983	export	TAZ_model_2021-12-28_21.04.46.xml	7.74676e-15
984	diffusion	TAZ_model_2021-12-28_21.08.34.xml	7.8822
985	diffusion_phosph	TAZ_model_2021-12-28_21.08.34.xml	1.02882
986	phosphorylation	TAZ_model_2021-12-28_21.08.34.xml	0.157939
987	dephosporylation	TAZ_model_2021-12-28_21.08.34.xml	0.358402
988	translation	TAZ_model_2021-12-28_21.08.34.xml	0.00504119
989	degradation	TAZ_model_2021-12-28_21.08.34.xml	0.00948565
990	import	TAZ_model_2021-12-28_21.08.34.xml	5.40272e-15
991	export	TAZ_model_2021-12-28_21.08.34.xml	5.54634e-15
992	diffusion	TAZ_model_2021-12-28_21.15.23.xml	7.44884
993	diffusion_phosph	TAZ_model_2021-12-28_21.15.23.xml	1.0396
994	phosphorylation	TAZ_model_2021-12-28_21.15.23.xml	0.210334
995	dephosporylation	TAZ_model_2021-12-28_21.15.23.xml	0.255817
996	translation	TAZ_model_2021-12-28_21.15.23.xml	0.00686932
997	degradation	TAZ_model_2021-12-28_21.15.23.xml	0.00949287
998	import	TAZ_model_2021-12-28_21.15.23.xml	6.10861e-15
999	export	TAZ_model_2021-12-28_21.15.23.xml	3.40724e-15
1000	diffusion	TAZ_model_2021-12-28_21.34.24.xml	9.21157
1001	diffusion_phosph	TAZ_model_2021-12-28_21.34.24.xml	1.11389
1002	phosphorylation	TAZ_model_2021-12-28_21.34.24.xml	0.119987
1003	dephosporylation	TAZ_model_2021-12-28_21.34.24.xml	0.357514
1004	translation	TAZ_model_2021-12-28_21.34.24.xml	0.00414415
1005	degradation	TAZ_model_2021-12-28_21.34.24.xml	0.00974665
1006	import	TAZ_model_2021-12-28_21.34.24.xml	5.25879e-15
1007	export	TAZ_model_2021-12-28_21.34.24.xml	8.07298e-15
1008	diffusion	TAZ_model_2021-12-28_21.49.20.xml	7.38171
1009	diffusion_phosph	TAZ_model_2021-12-28_21.49.20.xml	1.01409
1010	phosphorylation	TAZ_model_2021-12-28_21.49.20.xml	0.167892
1011	dephosporylation	TAZ_model_2021-12-28_21.49.20.xml	0.2158
1012	translation	TAZ_model_2021-12-28_21.49.20.xml	0.00556677
1013	degradation	TAZ_model_2021-12-28_21.49.20.xml	0.00920824
1014	import	TAZ_model_2021-12-28_21.49.20.xml	7.27786e-15
1015	export	TAZ_model_2021-12-28_21.49.20.xml	8.80936e-15
1016	diffusion	TAZ_model_2021-12-28_21.54.17.xml	7.73731
1017	diffusion_phosph	TAZ_model_2021-12-28_21.54.17.xml	1.00785
1018	phosphorylation	TAZ_model_2021-12-28_21.54.17.xml	0.244505
1019	dephosporylation	TAZ_model_2021-12-28_21.54.17.xml	0.276875
1020	translation	TAZ_model_2021-12-28_21.54.17.xml	0.00535891
1021	degradation	TAZ_model_2021-12-28_21.54.17.xml	0.00968535
1022	import	TAZ_model_2021-12-28_21.54.17.xml	8.59075e-15
1023	export	TAZ_model_2021-12-28_21.54.17.xml	2.60531e-15
1024	diffusion	TAZ_model_2021-12-28_22.01.26.xml	8.34841
1025	diffusion_phosph	TAZ_model_2021-12-28_22.01.26.xml	1.08554
1026	phosphorylation	TAZ_model_2021-12-28_22.01.26.xml	0.159236
1027	dephosporylation	TAZ_model_2021-12-28_22.01.26.xml	0.420217
1028	translation	TAZ_model_2021-12-28_22.01.26.xml	0.00409803
1029	degradation	TAZ_model_2021-12-28_22.01.26.xml	0.00972563
1030	import	TAZ_model_2021-12-28_22.01.26.xml	5.58006e-15
1031	export	TAZ_model_2021-12-28_22.01.26.xml	7.04802e-15
1032	diffusion	TAZ_model_2021-12-28_22.35.08.xml	8.51955
1033	diffusion_phosph	TAZ_model_2021-12-28_22.35.08.xml	1.02059
1034	phosphorylation	TAZ_model_2021-12-28_22.35.08.xml	0.0892023
1035	dephosporylation	TAZ_model_2021-12-28_22.35.08.xml	0.228968
1036	translation	TAZ_model_2021-12-28_22.35.08.xml	0.00870606
1037	degradation	TAZ_model_2021-12-28_22.35.08.xml	0.00914237
1038	import	TAZ_model_2021-12-28_22.35.08.xml	5.69239e-15
1039	export	TAZ_model_2021-12-28_22.35.08.xml	7.79411e-15
1040	diffusion	TAZ_model_2021-12-28_22.42.50.xml	9.29485
1041	diffusion_phosph	TAZ_model_2021-12-28_22.42.50.xml	1.01869
1042	phosphorylation	TAZ_model_2021-12-28_22.42.50.xml	0.102416
1043	dephosporylation	TAZ_model_2021-12-28_22.42.50.xml	0.120673
1044	translation	TAZ_model_2021-12-28_22.42.50.xml	0.00421686
1045	degradation	TAZ_model_2021-12-28_22.42.50.xml	0.00981378
1046	import	TAZ_model_2021-12-28_22.42.50.xml	5.19985e-15
1047	export	TAZ_model_2021-12-28_22.42.50.xml	9.35865e-15
1048	diffusion	TAZ_model_2021-12-28_22.47.00.xml	7.26853
1049	diffusion_phosph	TAZ_model_2021-12-28_22.47.00.xml	1.03721
1050	phosphorylation	TAZ_model_2021-12-28_22.47.00.xml	0.403345
1051	dephosporylation	TAZ_model_2021-12-28_22.47.00.xml	0.033678
1052	translation	TAZ_model_2021-12-28_22.47.00.xml	0.00247134
1053	degradation	TAZ_model_2021-12-28_22.47.00.xml	0.00848073
1054	import	TAZ_model_2021-12-28_22.47.00.xml	5.95516e-15
1055	export	TAZ_model_2021-12-28_22.47.00.xml	6.95839e-16
1056	diffusion	TAZ_model_2021-12-28_22.47.24.xml	9.95232
1057	diffusion_phosph	TAZ_model_2021-12-28_22.47.24.xml	1.00232
1058	phosphorylation	TAZ_model_2021-12-28_22.47.24.xml	0.124537
1059	dephosporylation	TAZ_model_2021-12-28_22.47.24.xml	0.267533
1060	translation	TAZ_model_2021-12-28_22.47.24.xml	0.00793652
1061	degradation	TAZ_model_2021-12-28_22.47.24.xml	0.00952917
1062	import	TAZ_model_2021-12-28_22.47.24.xml	3.49803e-15
1063	export	TAZ_model_2021-12-28_22.47.24.xml	6.3763e-15
1064	diffusion	TAZ_model_2021-12-28_23.22.26.xml	8.67206
1065	diffusion_phosph	TAZ_model_2021-12-28_23.22.26.xml	1.10068
1066	phosphorylation	TAZ_model_2021-12-28_23.22.26.xml	0.332339
1067	dephosporylation	TAZ_model_2021-12-28_23.22.26.xml	0.051798
1068	translation	TAZ_model_2021-12-28_23.22.26.xml	0.00418505
1069	degradation	TAZ_model_2021-12-28_23.22.26.xml	0.00974303
1070	import	TAZ_model_2021-12-28_23.22.26.xml	7.33268e-15
1071	export	TAZ_model_2021-12-28_23.22.26.xml	2.86769e-15
1072	diffusion	TAZ_model_2021-12-28_23.31.21.xml	8.33396
1073	diffusion_phosph	TAZ_model_2021-12-28_23.31.21.xml	1.1266
1074	phosphorylation	TAZ_model_2021-12-28_23.31.21.xml	0.231129
1075	dephosporylation	TAZ_model_2021-12-28_23.31.21.xml	0.0687284
1076	translation	TAZ_model_2021-12-28_23.31.21.xml	0.00297058
1077	degradation	TAZ_model_2021-12-28_23.31.21.xml	0.00974251
1078	import	TAZ_model_2021-12-28_23.31.21.xml	7.58733e-15
1079	export	TAZ_model_2021-12-28_23.31.21.xml	8.97385e-15
1080	diffusion	TAZ_model_2021-12-28_23.34.30.xml	8.66919
1081	diffusion_phosph	TAZ_model_2021-12-28_23.34.30.xml	1.09247
1082	phosphorylation	TAZ_model_2021-12-28_23.34.30.xml	0.159058
1083	dephosporylation	TAZ_model_2021-12-28_23.34.30.xml	0.320536
1084	translation	TAZ_model_2021-12-28_23.34.30.xml	0.00451542
1085	degradation	TAZ_model_2021-12-28_23.34.30.xml	0.009502
1086	import	TAZ_model_2021-12-28_23.34.30.xml	7.89585e-15
1087	export	TAZ_model_2021-12-28_23.34.30.xml	8.43121e-15
1088	diffusion	TAZ_model_2021-12-29_00.01.11.xml	9.70902
1089	diffusion_phosph	TAZ_model_2021-12-29_00.01.11.xml	1.18942
1090	phosphorylation	TAZ_model_2021-12-29_00.01.11.xml	0.30374
1091	dephosporylation	TAZ_model_2021-12-29_00.01.11.xml	0.0836915
1092	translation	TAZ_model_2021-12-29_00.01.11.xml	0.0071276
1093	degradation	TAZ_model_2021-12-29_00.01.11.xml	0.0099126
1094	import	TAZ_model_2021-12-29_00.01.11.xml	9.16482e-15
1095	export	TAZ_model_2021-12-29_00.01.11.xml	6.87092e-15
1096	diffusion	TAZ_model_2021-12-29_00.06.21.xml	6.90944
1097	diffusion_phosph	TAZ_model_2021-12-29_00.06.21.xml	1.04658
1098	phosphorylation	TAZ_model_2021-12-29_00.06.21.xml	0.123092
1099	dephosporylation	TAZ_model_2021-12-29_00.06.21.xml	0.204559
1100	translation	TAZ_model_2021-12-29_00.06.21.xml	0.00114059
1101	degradation	TAZ_model_2021-12-29_00.06.21.xml	0.00980464
1102	import	TAZ_model_2021-12-29_00.06.21.xml	7.92586e-15
1103	export	TAZ_model_2021-12-29_00.06.21.xml	7.82149e-15
1104	diffusion	TAZ_model_2021-12-29_00.17.37.xml	7.67667
1105	diffusion_phosph	TAZ_model_2021-12-29_00.17.37.xml	1.07212
1106	phosphorylation	TAZ_model_2021-12-29_00.17.37.xml	0.0967628
1107	dephosporylation	TAZ_model_2021-12-29_00.17.37.xml	0.149888
1108	translation	TAZ_model_2021-12-29_00.17.37.xml	0.00930615
1109	degradation	TAZ_model_2021-12-29_00.17.37.xml	0.00816965
1110	import	TAZ_model_2021-12-29_00.17.37.xml	9.0889e-15
1111	export	TAZ_model_2021-12-29_00.17.37.xml	6.11563e-15
1112	diffusion	TAZ_model_2021-12-29_00.21.15.xml	9.31756
1113	diffusion_phosph	TAZ_model_2021-12-29_00.21.15.xml	1.0675
1114	phosphorylation	TAZ_model_2021-12-29_00.21.15.xml	0.0741312
1115	dephosporylation	TAZ_model_2021-12-29_00.21.15.xml	0.0503547
1116	translation	TAZ_model_2021-12-29_00.21.15.xml	0.00284872
1117	degradation	TAZ_model_2021-12-29_00.21.15.xml	0.00996177
1118	import	TAZ_model_2021-12-29_00.21.15.xml	5.49276e-15
1119	export	TAZ_model_2021-12-29_00.21.15.xml	8.51767e-15
1120	diffusion	TAZ_model_2021-12-29_00.50.43.xml	9.11399
1121	diffusion_phosph	TAZ_model_2021-12-29_00.50.43.xml	1.03916
1122	phosphorylation	TAZ_model_2021-12-29_00.50.43.xml	0.230412
1123	dephosporylation	TAZ_model_2021-12-29_00.50.43.xml	0.140091
1124	translation	TAZ_model_2021-12-29_00.50.43.xml	0.00678574
1125	degradation	TAZ_model_2021-12-29_00.50.43.xml	0.00904404
1126	import	TAZ_model_2021-12-29_00.50.43.xml	8.24921e-15
1127	export	TAZ_model_2021-12-29_00.50.43.xml	1.16075e-15
1128	diffusion	TAZ_model_2021-12-29_01.01.24.xml	7.79977
1129	diffusion_phosph	TAZ_model_2021-12-29_01.01.24.xml	1.01288
1130	phosphorylation	TAZ_model_2021-12-29_01.01.24.xml	0.273464
1131	dephosporylation	TAZ_model_2021-12-29_01.01.24.xml	0.0423856
1132	translation	TAZ_model_2021-12-29_01.01.24.xml	0.00482652
1133	degradation	TAZ_model_2021-12-29_01.01.24.xml	0.00906769
1134	import	TAZ_model_2021-12-29_01.01.24.xml	9.74902e-15
1135	export	TAZ_model_2021-12-29_01.01.24.xml	3.68553e-16
1136	diffusion	TAZ_model_2021-12-29_01.10.54.xml	8.9447
1137	diffusion_phosph	TAZ_model_2021-12-29_01.10.54.xml	1.01419
1138	phosphorylation	TAZ_model_2021-12-29_01.10.54.xml	0.144653
1139	dephosporylation	TAZ_model_2021-12-29_01.10.54.xml	0.399746
1140	translation	TAZ_model_2021-12-29_01.10.54.xml	0.00474219
1141	degradation	TAZ_model_2021-12-29_01.10.54.xml	0.00938471
1142	import	TAZ_model_2021-12-29_01.10.54.xml	7.89105e-15
1143	export	TAZ_model_2021-12-29_01.10.54.xml	5.07398e-15
1144	diffusion	TAZ_model_2021-12-29_01.12.16.xml	8.1187
1145	diffusion_phosph	TAZ_model_2021-12-29_01.12.16.xml	1.05474
1146	phosphorylation	TAZ_model_2021-12-29_01.12.16.xml	0.336084
1147	dephosporylation	TAZ_model_2021-12-29_01.12.16.xml	0.220502
1148	translation	TAZ_model_2021-12-29_01.12.16.xml	0.00567206
1149	degradation	TAZ_model_2021-12-29_01.12.16.xml	0.00961293
1150	import	TAZ_model_2021-12-29_01.12.16.xml	4.40706e-15
1151	export	TAZ_model_2021-12-29_01.12.16.xml	1.36372e-15
1152	diffusion	TAZ_model_2021-12-29_01.36.11.xml	9.96198
1153	diffusion_phosph	TAZ_model_2021-12-29_01.36.11.xml	1.09015
1154	phosphorylation	TAZ_model_2021-12-29_01.36.11.xml	0.449636
1155	dephosporylation	TAZ_model_2021-12-29_01.36.11.xml	0.0104496
1156	translation	TAZ_model_2021-12-29_01.36.11.xml	0.00885114
1157	degradation	TAZ_model_2021-12-29_01.36.11.xml	0.00880065
1158	import	TAZ_model_2021-12-29_01.36.11.xml	6.58298e-15
1159	export	TAZ_model_2021-12-29_01.36.11.xml	7.82948e-15
1160	diffusion	TAZ_model_2021-12-29_01.39.40.xml	5.74121
1161	diffusion_phosph	TAZ_model_2021-12-29_01.39.40.xml	1.06546
1162	phosphorylation	TAZ_model_2021-12-29_01.39.40.xml	0.475908
1163	dephosporylation	TAZ_model_2021-12-29_01.39.40.xml	0.0644237
1164	translation	TAZ_model_2021-12-29_01.39.40.xml	0.00249451
1165	degradation	TAZ_model_2021-12-29_01.39.40.xml	0.00953089
1166	import	TAZ_model_2021-12-29_01.39.40.xml	9.05768e-15
1167	export	TAZ_model_2021-12-29_01.39.40.xml	3.88529e-16
1168	diffusion	TAZ_model_2021-12-29_01.42.24.xml	5.36636
1169	diffusion_phosph	TAZ_model_2021-12-29_01.42.24.xml	1.05172
1170	phosphorylation	TAZ_model_2021-12-29_01.42.24.xml	0.477699
1171	dephosporylation	TAZ_model_2021-12-29_01.42.24.xml	0.0209901
1172	translation	TAZ_model_2021-12-29_01.42.24.xml	0.00660084
1173	degradation	TAZ_model_2021-12-29_01.42.24.xml	0.00889772
1174	import	TAZ_model_2021-12-29_01.42.24.xml	5.83285e-15
1175	export	TAZ_model_2021-12-29_01.42.24.xml	6.58474e-16
1176	diffusion	TAZ_model_2021-12-29_02.12.33.xml	6.49762
1177	diffusion_phosph	TAZ_model_2021-12-29_02.12.33.xml	1.0427
1178	phosphorylation	TAZ_model_2021-12-29_02.12.33.xml	0.281257
1179	dephosporylation	TAZ_model_2021-12-29_02.12.33.xml	0.159656
1180	translation	TAZ_model_2021-12-29_02.12.33.xml	0.00153734
1181	degradation	TAZ_model_2021-12-29_02.12.33.xml	0.0096339
1182	import	TAZ_model_2021-12-29_02.12.33.xml	8.58525e-15
1183	export	TAZ_model_2021-12-29_02.12.33.xml	2.76758e-15
1184	diffusion	TAZ_model_2021-12-29_02.22.43.xml	8.65262
1185	diffusion_phosph	TAZ_model_2021-12-29_02.22.43.xml	1.06037
1186	phosphorylation	TAZ_model_2021-12-29_02.22.43.xml	0.11867
1187	dephosporylation	TAZ_model_2021-12-29_02.22.43.xml	0.0266064
1188	translation	TAZ_model_2021-12-29_02.22.43.xml	0.00908886
1189	degradation	TAZ_model_2021-12-29_02.22.43.xml	0.00910941
1190	import	TAZ_model_2021-12-29_02.22.43.xml	4.10355e-15
1191	export	TAZ_model_2021-12-29_02.22.43.xml	4.52471e-15
1192	diffusion	TAZ_model_2021-12-29_02.26.29.xml	8.53635
1193	diffusion_phosph	TAZ_model_2021-12-29_02.26.29.xml	1.02223
1194	phosphorylation	TAZ_model_2021-12-29_02.26.29.xml	0.468426
1195	dephosporylation	TAZ_model_2021-12-29_02.26.29.xml	0.276954
1196	translation	TAZ_model_2021-12-29_02.26.29.xml	0.00622082
1197	degradation	TAZ_model_2021-12-29_02.26.29.xml	0.00989335
1198	import	TAZ_model_2021-12-29_02.26.29.xml	6.12491e-15
1199	export	TAZ_model_2021-12-29_02.26.29.xml	2.25238e-15
1200	diffusion	TAZ_model_2021-12-29_02.30.21.xml	7.45643
1201	diffusion_phosph	TAZ_model_2021-12-29_02.30.21.xml	1.09524
1202	phosphorylation	TAZ_model_2021-12-29_02.30.21.xml	0.343939
1203	dephosporylation	TAZ_model_2021-12-29_02.30.21.xml	0.0614226
1204	translation	TAZ_model_2021-12-29_02.30.21.xml	0.00227644
1205	degradation	TAZ_model_2021-12-29_02.30.21.xml	0.00956236
1206	import	TAZ_model_2021-12-29_02.30.21.xml	9.68782e-15
1207	export	TAZ_model_2021-12-29_02.30.21.xml	7.36577e-15
1208	diffusion	TAZ_model_2021-12-29_03.08.43.xml	7.18279
1209	diffusion_phosph	TAZ_model_2021-12-29_03.08.43.xml	1.02056
1210	phosphorylation	TAZ_model_2021-12-29_03.08.43.xml	0.138426
1211	dephosporylation	TAZ_model_2021-12-29_03.08.43.xml	0.138276
1212	translation	TAZ_model_2021-12-29_03.08.43.xml	0.00707177
1213	degradation	TAZ_model_2021-12-29_03.08.43.xml	0.00983566
1214	import	TAZ_model_2021-12-29_03.08.43.xml	6.94912e-15
1215	export	TAZ_model_2021-12-29_03.08.43.xml	6.71297e-15
1216	diffusion	TAZ_model_2021-12-29_03.10.27.xml	7.05874
1217	diffusion_phosph	TAZ_model_2021-12-29_03.10.27.xml	1.04456
1218	phosphorylation	TAZ_model_2021-12-29_03.10.27.xml	0.476711
1219	dephosporylation	TAZ_model_2021-12-29_03.10.27.xml	0.150567
1220	translation	TAZ_model_2021-12-29_03.10.27.xml	0.00606491
1221	degradation	TAZ_model_2021-12-29_03.10.27.xml	0.00926879
1222	import	TAZ_model_2021-12-29_03.10.27.xml	8.80771e-15
1223	export	TAZ_model_2021-12-29_03.10.27.xml	1.07804e-15
1224	diffusion	TAZ_model_2021-12-29_03.19.26.xml	7.7536
1225	diffusion_phosph	TAZ_model_2021-12-29_03.19.26.xml	1.02626
1226	phosphorylation	TAZ_model_2021-12-29_03.19.26.xml	0.441058
1227	dephosporylation	TAZ_model_2021-12-29_03.19.26.xml	0.451745
1228	translation	TAZ_model_2021-12-29_03.19.26.xml	0.00532318
1229	degradation	TAZ_model_2021-12-29_03.19.26.xml	0.00912598
1230	import	TAZ_model_2021-12-29_03.19.26.xml	9.22181e-15
1231	export	TAZ_model_2021-12-29_03.19.26.xml	2.14271e-15
1232	diffusion	TAZ_model_2021-12-29_03.21.32.xml	7.85216
1233	diffusion_phosph	TAZ_model_2021-12-29_03.21.32.xml	1.0243
1234	phosphorylation	TAZ_model_2021-12-29_03.21.32.xml	0.145445
1235	dephosporylation	TAZ_model_2021-12-29_03.21.32.xml	0.182528
1236	translation	TAZ_model_2021-12-29_03.21.32.xml	0.00227625
1237	degradation	TAZ_model_2021-12-29_03.21.32.xml	0.00796161
1238	import	TAZ_model_2021-12-29_03.21.32.xml	8.78904e-15
1239	export	TAZ_model_2021-12-29_03.21.32.xml	5.69616e-15
1240	diffusion	TAZ_model_2021-12-29_03.55.41.xml	6.84606
1241	diffusion_phosph	TAZ_model_2021-12-29_03.55.41.xml	1.00842
1242	phosphorylation	TAZ_model_2021-12-29_03.55.41.xml	0.468809
1243	dephosporylation	TAZ_model_2021-12-29_03.55.41.xml	0.10126
1244	translation	TAZ_model_2021-12-29_03.55.41.xml	0.00801753
1245	degradation	TAZ_model_2021-12-29_03.55.41.xml	0.00855727
1246	import	TAZ_model_2021-12-29_03.55.41.xml	6.94774e-15
1247	export	TAZ_model_2021-12-29_03.55.41.xml	4.50323e-16
1248	diffusion	TAZ_model_2021-12-29_03.59.07.xml	9.21805
1249	diffusion_phosph	TAZ_model_2021-12-29_03.59.07.xml	1.02632
1250	phosphorylation	TAZ_model_2021-12-29_03.59.07.xml	0.232212
1251	dephosporylation	TAZ_model_2021-12-29_03.59.07.xml	0.189458
1252	translation	TAZ_model_2021-12-29_03.59.07.xml	0.00897937
1253	degradation	TAZ_model_2021-12-29_03.59.07.xml	0.00972029
1254	import	TAZ_model_2021-12-29_03.59.07.xml	3.37377e-15
1255	export	TAZ_model_2021-12-29_03.59.07.xml	2.3648e-15
1256	diffusion	TAZ_model_2021-12-29_04.07.43.xml	9.15981
1257	diffusion_phosph	TAZ_model_2021-12-29_04.07.43.xml	1.00059
1258	phosphorylation	TAZ_model_2021-12-29_04.07.43.xml	0.452625
1259	dephosporylation	TAZ_model_2021-12-29_04.07.43.xml	0.0606174
1260	translation	TAZ_model_2021-12-29_04.07.43.xml	0.00864494
1261	degradation	TAZ_model_2021-12-29_04.07.43.xml	0.0099846
1262	import	TAZ_model_2021-12-29_04.07.43.xml	5.09281e-15
1263	export	TAZ_model_2021-12-29_04.07.43.xml	9.02451e-16
1264	diffusion	TAZ_model_2021-12-29_04.22.47.xml	6.51823
1265	diffusion_phosph	TAZ_model_2021-12-29_04.22.47.xml	1.04848
1266	phosphorylation	TAZ_model_2021-12-29_04.22.47.xml	0.146016
1267	dephosporylation	TAZ_model_2021-12-29_04.22.47.xml	0.333433
1268	translation	TAZ_model_2021-12-29_04.22.47.xml	0.00129366
1269	degradation	TAZ_model_2021-12-29_04.22.47.xml	0.00972001
1270	import	TAZ_model_2021-12-29_04.22.47.xml	9.92838e-15
1271	export	TAZ_model_2021-12-29_04.22.47.xml	6.81223e-15
1272	diffusion	TAZ_model_2021-12-29_04.38.07.xml	6.98312
1273	diffusion_phosph	TAZ_model_2021-12-29_04.38.07.xml	1.00772
1274	phosphorylation	TAZ_model_2021-12-29_04.38.07.xml	0.244052
1275	dephosporylation	TAZ_model_2021-12-29_04.38.07.xml	0.0566382
1276	translation	TAZ_model_2021-12-29_04.38.07.xml	0.00790034
1277	degradation	TAZ_model_2021-12-29_04.38.07.xml	0.00897654
1278	import	TAZ_model_2021-12-29_04.38.07.xml	8.07436e-15
1279	export	TAZ_model_2021-12-29_04.38.07.xml	2.5131e-15
1280	diffusion	TAZ_model_2021-12-29_04.44.09.xml	8.9256
1281	diffusion_phosph	TAZ_model_2021-12-29_04.44.09.xml	1.11192
1282	phosphorylation	TAZ_model_2021-12-29_04.44.09.xml	0.134155
1283	dephosporylation	TAZ_model_2021-12-29_04.44.09.xml	0.122685
1284	translation	TAZ_model_2021-12-29_04.44.09.xml	0.00600593
1285	degradation	TAZ_model_2021-12-29_04.44.09.xml	0.00901208
1286	import	TAZ_model_2021-12-29_04.44.09.xml	3.35176e-15
1287	export	TAZ_model_2021-12-29_04.44.09.xml	6.47615e-15
1288	diffusion	TAZ_model_2021-12-29_04.53.23.xml	7.42728
1289	diffusion_phosph	TAZ_model_2021-12-29_04.53.23.xml	1.0967
1290	phosphorylation	TAZ_model_2021-12-29_04.53.23.xml	0.0943951
1291	dephosporylation	TAZ_model_2021-12-29_04.53.23.xml	0.177069
1292	translation	TAZ_model_2021-12-29_04.53.23.xml	0.00273673
1293	degradation	TAZ_model_2021-12-29_04.53.23.xml	0.00952745
1294	import	TAZ_model_2021-12-29_04.53.23.xml	5.30459e-15
1295	export	TAZ_model_2021-12-29_04.53.23.xml	7.48859e-15
1296	diffusion	TAZ_model_2021-12-29_05.24.08.xml	7.56191
1297	diffusion_phosph	TAZ_model_2021-12-29_05.24.08.xml	1.02452
1298	phosphorylation	TAZ_model_2021-12-29_05.24.08.xml	0.460682
1299	dephosporylation	TAZ_model_2021-12-29_05.24.08.xml	0.0290289
1300	translation	TAZ_model_2021-12-29_05.24.08.xml	0.00669223
1301	degradation	TAZ_model_2021-12-29_05.24.08.xml	0.00980461
1302	import	TAZ_model_2021-12-29_05.24.08.xml	8.7152e-15
1303	export	TAZ_model_2021-12-29_05.24.08.xml	8.70181e-16
1304	diffusion	TAZ_model_2021-12-29_05.31.09.xml	9.31779
1305	diffusion_phosph	TAZ_model_2021-12-29_05.31.09.xml	1.0167
1306	phosphorylation	TAZ_model_2021-12-29_05.31.09.xml	0.107297
1307	dephosporylation	TAZ_model_2021-12-29_05.31.09.xml	0.221875
1308	translation	TAZ_model_2021-12-29_05.31.09.xml	0.0031874
1309	degradation	TAZ_model_2021-12-29_05.31.09.xml	0.00891702
1310	import	TAZ_model_2021-12-29_05.31.09.xml	8.53508e-15
1311	export	TAZ_model_2021-12-29_05.31.09.xml	6.21919e-15
1312	diffusion	TAZ_model_2021-12-29_05.35.48.xml	8.27355
1313	diffusion_phosph	TAZ_model_2021-12-29_05.35.48.xml	1.06353
1314	phosphorylation	TAZ_model_2021-12-29_05.35.48.xml	0.130938
1315	dephosporylation	TAZ_model_2021-12-29_05.35.48.xml	0.119484
1316	translation	TAZ_model_2021-12-29_05.35.48.xml	0.00364799
1317	degradation	TAZ_model_2021-12-29_05.35.48.xml	0.00942787
1318	import	TAZ_model_2021-12-29_05.35.48.xml	9.99829e-15
1319	export	TAZ_model_2021-12-29_05.35.48.xml	8.46427e-15
1320	diffusion	TAZ_model_2021-12-29_05.42.50.xml	9.09291
1321	diffusion_phosph	TAZ_model_2021-12-29_05.42.50.xml	1.17795
1322	phosphorylation	TAZ_model_2021-12-29_05.42.50.xml	0.0988779
1323	dephosporylation	TAZ_model_2021-12-29_05.42.50.xml	0.127093
1324	translation	TAZ_model_2021-12-29_05.42.50.xml	0.00609419
1325	degradation	TAZ_model_2021-12-29_05.42.50.xml	0.00939515
1326	import	TAZ_model_2021-12-29_05.42.50.xml	4.22256e-15
1327	export	TAZ_model_2021-12-29_05.42.50.xml	8.2068e-15
1328	diffusion	TAZ_model_2021-12-29_06.14.28.xml	8.97961
1329	diffusion_phosph	TAZ_model_2021-12-29_06.14.28.xml	1.0563
1330	phosphorylation	TAZ_model_2021-12-29_06.14.28.xml	0.343515
1331	dephosporylation	TAZ_model_2021-12-29_06.14.28.xml	0.35283
1332	translation	TAZ_model_2021-12-29_06.14.28.xml	0.00372875
1333	degradation	TAZ_model_2021-12-29_06.14.28.xml	0.00984315
1334	import	TAZ_model_2021-12-29_06.14.28.xml	6.40705e-15
1335	export	TAZ_model_2021-12-29_06.14.28.xml	7.77307e-16
1336	diffusion	TAZ_model_2021-12-29_06.19.28.xml	7.41399
1337	diffusion_phosph	TAZ_model_2021-12-29_06.19.28.xml	1.10141
1338	phosphorylation	TAZ_model_2021-12-29_06.19.28.xml	0.326394
1339	dephosporylation	TAZ_model_2021-12-29_06.19.28.xml	0.0155968
1340	translation	TAZ_model_2021-12-29_06.19.28.xml	0.00348384
1341	degradation	TAZ_model_2021-12-29_06.19.28.xml	0.00858394
1342	import	TAZ_model_2021-12-29_06.19.28.xml	6.047e-15
1343	export	TAZ_model_2021-12-29_06.19.28.xml	4.11283e-16
1344	diffusion	TAZ_model_2021-12-29_06.29.03.xml	7.50974
1345	diffusion_phosph	TAZ_model_2021-12-29_06.29.03.xml	1.05601
1346	phosphorylation	TAZ_model_2021-12-29_06.29.03.xml	0.428146
1347	dephosporylation	TAZ_model_2021-12-29_06.29.03.xml	0.0547211
1348	translation	TAZ_model_2021-12-29_06.29.03.xml	0.00951741
1349	degradation	TAZ_model_2021-12-29_06.29.03.xml	0.00959534
1350	import	TAZ_model_2021-12-29_06.29.03.xml	9.85885e-15
1351	export	TAZ_model_2021-12-29_06.29.03.xml	8.60173e-16
1352	diffusion	TAZ_model_2021-12-29_06.44.57.xml	9.82396
1353	diffusion_phosph	TAZ_model_2021-12-29_06.44.57.xml	1.20365
1354	phosphorylation	TAZ_model_2021-12-29_06.44.57.xml	0.140182
1355	dephosporylation	TAZ_model_2021-12-29_06.44.57.xml	0.0926298
1356	translation	TAZ_model_2021-12-29_06.44.57.xml	0.00427603
1357	degradation	TAZ_model_2021-12-29_06.44.57.xml	0.00882143
1358	import	TAZ_model_2021-12-29_06.44.57.xml	2.89341e-15
1359	export	TAZ_model_2021-12-29_06.44.57.xml	6.84329e-15
1360	diffusion	TAZ_model_2021-12-29_06.57.14.xml	8.16639
1361	diffusion_phosph	TAZ_model_2021-12-29_06.57.14.xml	1.09044
1362	phosphorylation	TAZ_model_2021-12-29_06.57.14.xml	0.248125
1363	dephosporylation	TAZ_model_2021-12-29_06.57.14.xml	0.164405
1364	translation	TAZ_model_2021-12-29_06.57.14.xml	0.00440916
1365	degradation	TAZ_model_2021-12-29_06.57.14.xml	0.00995833
1366	import	TAZ_model_2021-12-29_06.57.14.xml	9.56713e-15
1367	export	TAZ_model_2021-12-29_06.57.14.xml	5.15913e-15
1368	diffusion	TAZ_model_2021-12-29_07.01.08.xml	6.43075
1369	diffusion_phosph	TAZ_model_2021-12-29_07.01.08.xml	1.03751
1370	phosphorylation	TAZ_model_2021-12-29_07.01.08.xml	0.43505
1371	dephosporylation	TAZ_model_2021-12-29_07.01.08.xml	0.0380849
1372	translation	TAZ_model_2021-12-29_07.01.08.xml	0.00519244
1373	degradation	TAZ_model_2021-12-29_07.01.08.xml	0.00940745
1374	import	TAZ_model_2021-12-29_07.01.08.xml	5.32042e-15
1375	export	TAZ_model_2021-12-29_07.01.08.xml	5.34882e-16
1376	diffusion	TAZ_model_2021-12-29_07.13.08.xml	7.49443
1377	diffusion_phosph	TAZ_model_2021-12-29_07.13.08.xml	1.06111
1378	phosphorylation	TAZ_model_2021-12-29_07.13.08.xml	0.104321
1379	dephosporylation	TAZ_model_2021-12-29_07.13.08.xml	0.0457659
1380	translation	TAZ_model_2021-12-29_07.13.08.xml	0.00424021
1381	degradation	TAZ_model_2021-12-29_07.13.08.xml	0.0086146
1382	import	TAZ_model_2021-12-29_07.13.08.xml	9.83613e-15
1383	export	TAZ_model_2021-12-29_07.13.08.xml	3.26249e-15
1384	diffusion	TAZ_model_2021-12-29_07.44.22.xml	8.13104
1385	diffusion_phosph	TAZ_model_2021-12-29_07.44.22.xml	1.02122
1386	phosphorylation	TAZ_model_2021-12-29_07.44.22.xml	0.242549
1387	dephosporylation	TAZ_model_2021-12-29_07.44.22.xml	0.372323
1388	translation	TAZ_model_2021-12-29_07.44.22.xml	0.00613338
1389	degradation	TAZ_model_2021-12-29_07.44.22.xml	0.00947423
1390	import	TAZ_model_2021-12-29_07.44.22.xml	8.58436e-15
1391	export	TAZ_model_2021-12-29_07.44.22.xml	6.61616e-15
1392	diffusion	TAZ_model_2021-12-29_07.48.08.xml	8.02817
1393	diffusion_phosph	TAZ_model_2021-12-29_07.48.08.xml	1.06219
1394	phosphorylation	TAZ_model_2021-12-29_07.48.08.xml	0.251449
1395	dephosporylation	TAZ_model_2021-12-29_07.48.08.xml	0.179014
1396	translation	TAZ_model_2021-12-29_07.48.08.xml	0.00437902
1397	degradation	TAZ_model_2021-12-29_07.48.08.xml	0.0099925
1398	import	TAZ_model_2021-12-29_07.48.08.xml	8.73404e-15
1399	export	TAZ_model_2021-12-29_07.48.08.xml	3.40727e-15
1400	diffusion	TAZ_model_2021-12-29_07.57.01.xml	8.08277
1401	diffusion_phosph	TAZ_model_2021-12-29_07.57.01.xml	1.03231
1402	phosphorylation	TAZ_model_2021-12-29_07.57.01.xml	0.181343
1403	dephosporylation	TAZ_model_2021-12-29_07.57.01.xml	0.0328666
1404	translation	TAZ_model_2021-12-29_07.57.01.xml	0.00254816
1405	degradation	TAZ_model_2021-12-29_07.57.01.xml	0.00990748
1406	import	TAZ_model_2021-12-29_07.57.01.xml	6.02509e-15
1407	export	TAZ_model_2021-12-29_07.57.01.xml	8.57681e-15
1408	diffusion	TAZ_model_2021-12-29_07.59.33.xml	8.04258
1409	diffusion_phosph	TAZ_model_2021-12-29_07.59.33.xml	1.1374
1410	phosphorylation	TAZ_model_2021-12-29_07.59.33.xml	0.146888
1411	dephosporylation	TAZ_model_2021-12-29_07.59.33.xml	0.320883
1412	translation	TAZ_model_2021-12-29_07.59.33.xml	0.00658255
1413	degradation	TAZ_model_2021-12-29_07.59.33.xml	0.00941642
1414	import	TAZ_model_2021-12-29_07.59.33.xml	6.74806e-15
1415	export	TAZ_model_2021-12-29_07.59.33.xml	6.91973e-15
1416	diffusion	TAZ_model_2021-12-29_08.30.46.xml	8.69903
1417	diffusion_phosph	TAZ_model_2021-12-29_08.30.46.xml	1.09328
1418	phosphorylation	TAZ_model_2021-12-29_08.30.46.xml	0.238644
1419	dephosporylation	TAZ_model_2021-12-29_08.30.46.xml	0.232192
1420	translation	TAZ_model_2021-12-29_08.30.46.xml	0.00656088
1421	degradation	TAZ_model_2021-12-29_08.30.46.xml	0.00977273
1422	import	TAZ_model_2021-12-29_08.30.46.xml	8.67125e-15
1423	export	TAZ_model_2021-12-29_08.30.46.xml	5.82253e-15
1424	diffusion	TAZ_model_2021-12-29_08.32.39.xml	7.00297
1425	diffusion_phosph	TAZ_model_2021-12-29_08.32.39.xml	1.11538
1426	phosphorylation	TAZ_model_2021-12-29_08.32.39.xml	0.488342
1427	dephosporylation	TAZ_model_2021-12-29_08.32.39.xml	0.0202826
1428	translation	TAZ_model_2021-12-29_08.32.39.xml	0.0070735
1429	degradation	TAZ_model_2021-12-29_08.32.39.xml	0.00991616
1430	import	TAZ_model_2021-12-29_08.32.39.xml	8.4754e-15
1431	export	TAZ_model_2021-12-29_08.32.39.xml	8.39574e-16
1432	diffusion	TAZ_model_2021-12-29_08.48.39.xml	9.34916
1433	diffusion_phosph	TAZ_model_2021-12-29_08.48.39.xml	1.06778
1434	phosphorylation	TAZ_model_2021-12-29_08.48.39.xml	0.155211
1435	dephosporylation	TAZ_model_2021-12-29_08.48.39.xml	0.24195
1436	translation	TAZ_model_2021-12-29_08.48.39.xml	0.00541729
1437	degradation	TAZ_model_2021-12-29_08.48.39.xml	0.00940898
1438	import	TAZ_model_2021-12-29_08.48.39.xml	3.10095e-15
1439	export	TAZ_model_2021-12-29_08.48.39.xml	4.58754e-15
1440	diffusion	TAZ_model_2021-12-29_09.08.36.xml	8.01461
1441	diffusion_phosph	TAZ_model_2021-12-29_09.08.36.xml	1.07298
1442	phosphorylation	TAZ_model_2021-12-29_09.08.36.xml	0.345783
1443	dephosporylation	TAZ_model_2021-12-29_09.08.36.xml	0.438067
1444	translation	TAZ_model_2021-12-29_09.08.36.xml	0.00578164
1445	degradation	TAZ_model_2021-12-29_09.08.36.xml	0.00986668
1446	import	TAZ_model_2021-12-29_09.08.36.xml	7.34545e-15
1447	export	TAZ_model_2021-12-29_09.08.36.xml	3.07008e-15
1448	diffusion	TAZ_model_2021-12-29_09.12.45.xml	7.15027
1449	diffusion_phosph	TAZ_model_2021-12-29_09.12.45.xml	1.11347
1450	phosphorylation	TAZ_model_2021-12-29_09.12.45.xml	0.087223
1451	dephosporylation	TAZ_model_2021-12-29_09.12.45.xml	0.0490361
1452	translation	TAZ_model_2021-12-29_09.12.45.xml	0.00643325
1453	degradation	TAZ_model_2021-12-29_09.12.45.xml	0.00989927
1454	import	TAZ_model_2021-12-29_09.12.45.xml	9.30197e-15
1455	export	TAZ_model_2021-12-29_09.12.45.xml	4.4331e-15
1456	diffusion	TAZ_model_2021-12-29_09.14.38.xml	7.80022
1457	diffusion_phosph	TAZ_model_2021-12-29_09.14.38.xml	1.08966
1458	phosphorylation	TAZ_model_2021-12-29_09.14.38.xml	0.453123
1459	dephosporylation	TAZ_model_2021-12-29_09.14.38.xml	0.028046
1460	translation	TAZ_model_2021-12-29_09.14.38.xml	0.00756483
1461	degradation	TAZ_model_2021-12-29_09.14.38.xml	0.00962293
1462	import	TAZ_model_2021-12-29_09.14.38.xml	7.09988e-15
1463	export	TAZ_model_2021-12-29_09.14.38.xml	4.71144e-16
1464	diffusion	TAZ_model_2021-12-29_09.36.56.xml	9.13183
1465	diffusion_phosph	TAZ_model_2021-12-29_09.36.56.xml	1.02089
1466	phosphorylation	TAZ_model_2021-12-29_09.36.56.xml	0.098416
1467	dephosporylation	TAZ_model_2021-12-29_09.36.56.xml	0.294182
1468	translation	TAZ_model_2021-12-29_09.36.56.xml	0.00602149
1469	degradation	TAZ_model_2021-12-29_09.36.56.xml	0.00717922
1470	import	TAZ_model_2021-12-29_09.36.56.xml	6.78235e-15
1471	export	TAZ_model_2021-12-29_09.36.56.xml	3.65146e-15
1472	diffusion	TAZ_model_2021-12-29_09.57.39.xml	9.2976
1473	diffusion_phosph	TAZ_model_2021-12-29_09.57.39.xml	1.18771
1474	phosphorylation	TAZ_model_2021-12-29_09.57.39.xml	0.11283
1475	dephosporylation	TAZ_model_2021-12-29_09.57.39.xml	0.288479
1476	translation	TAZ_model_2021-12-29_09.57.39.xml	0.00114628
1477	degradation	TAZ_model_2021-12-29_09.57.39.xml	0.00859978
1478	import	TAZ_model_2021-12-29_09.57.39.xml	8.62293e-15
1479	export	TAZ_model_2021-12-29_09.57.39.xml	5.25427e-15
1480	diffusion	TAZ_model_2021-12-29_09.59.32.xml	9.89019
1481	diffusion_phosph	TAZ_model_2021-12-29_09.59.32.xml	1.04152
1482	phosphorylation	TAZ_model_2021-12-29_09.59.32.xml	0.306125
1483	dephosporylation	TAZ_model_2021-12-29_09.59.32.xml	0.341976
1484	translation	TAZ_model_2021-12-29_09.59.32.xml	0.00385574
1485	degradation	TAZ_model_2021-12-29_09.59.32.xml	0.00916831
1486	import	TAZ_model_2021-12-29_09.59.32.xml	7.04887e-15
1487	export	TAZ_model_2021-12-29_09.59.32.xml	5.96102e-15
1488	diffusion	TAZ_model_2021-12-29_10.19.38.xml	6.71564
1489	diffusion_phosph	TAZ_model_2021-12-29_10.19.38.xml	1.05258
1490	phosphorylation	TAZ_model_2021-12-29_10.19.38.xml	0.31441
1491	dephosporylation	TAZ_model_2021-12-29_10.19.38.xml	0.154551
1492	translation	TAZ_model_2021-12-29_10.19.38.xml	0.00520096
1493	degradation	TAZ_model_2021-12-29_10.19.38.xml	0.00980142
1494	import	TAZ_model_2021-12-29_10.19.38.xml	5.27198e-15
1495	export	TAZ_model_2021-12-29_10.19.38.xml	1.57032e-15
1496	diffusion	TAZ_model_2021-12-29_10.25.35.xml	9.3423
1497	diffusion_phosph	TAZ_model_2021-12-29_10.25.35.xml	1.00291
1498	phosphorylation	TAZ_model_2021-12-29_10.25.35.xml	0.427178
1499	dephosporylation	TAZ_model_2021-12-29_10.25.35.xml	0.0141098
1500	translation	TAZ_model_2021-12-29_10.25.35.xml	0.00926761
1501	degradation	TAZ_model_2021-12-29_10.25.35.xml	0.0097423
1502	import	TAZ_model_2021-12-29_10.25.35.xml	9.60125e-15
1503	export	TAZ_model_2021-12-29_10.25.35.xml	3.38915e-16
1504	diffusion	TAZ_model_2021-12-29_10.44.03.xml	7.89459
1505	diffusion_phosph	TAZ_model_2021-12-29_10.44.03.xml	1.00906
1506	phosphorylation	TAZ_model_2021-12-29_10.44.03.xml	0.13384
1507	dephosporylation	TAZ_model_2021-12-29_10.44.03.xml	0.237128
1508	translation	TAZ_model_2021-12-29_10.44.03.xml	0.00269472
1509	degradation	TAZ_model_2021-12-29_10.44.03.xml	0.00855679
1510	import	TAZ_model_2021-12-29_10.44.03.xml	5.51139e-15
1511	export	TAZ_model_2021-12-29_10.44.03.xml	9.55816e-15
1512	diffusion	TAZ_model_2021-12-29_10.46.13.xml	7.96356
1513	diffusion_phosph	TAZ_model_2021-12-29_10.46.13.xml	1.07132
1514	phosphorylation	TAZ_model_2021-12-29_10.46.13.xml	0.193684
1515	dephosporylation	TAZ_model_2021-12-29_10.46.13.xml	0.0373462
1516	translation	TAZ_model_2021-12-29_10.46.13.xml	0.00454166
1517	degradation	TAZ_model_2021-12-29_10.46.13.xml	0.00908919
1518	import	TAZ_model_2021-12-29_10.46.13.xml	8.04018e-15
1519	export	TAZ_model_2021-12-29_10.46.13.xml	1.51311e-15
1520	diffusion	TAZ_model_2021-12-29_11.08.09.xml	9.77693
1521	diffusion_phosph	TAZ_model_2021-12-29_11.08.09.xml	1.02269
1522	phosphorylation	TAZ_model_2021-12-29_11.08.09.xml	0.397213
1523	dephosporylation	TAZ_model_2021-12-29_11.08.09.xml	0.0223783
1524	translation	TAZ_model_2021-12-29_11.08.09.xml	0.00447284
1525	degradation	TAZ_model_2021-12-29_11.08.09.xml	0.00908282
1526	import	TAZ_model_2021-12-29_11.08.09.xml	6.33979e-15
1527	export	TAZ_model_2021-12-29_11.08.09.xml	5.59605e-15
1528	diffusion	TAZ_model_2021-12-29_11.31.04.xml	8.00797
1529	diffusion_phosph	TAZ_model_2021-12-29_11.31.04.xml	1.0037
1530	phosphorylation	TAZ_model_2021-12-29_11.31.04.xml	0.152147
1531	dephosporylation	TAZ_model_2021-12-29_11.31.04.xml	0.0663951
1532	translation	TAZ_model_2021-12-29_11.31.04.xml	0.00306286
1533	degradation	TAZ_model_2021-12-29_11.31.04.xml	0.00931137
1534	import	TAZ_model_2021-12-29_11.31.04.xml	9.37747e-15
1535	export	TAZ_model_2021-12-29_11.31.04.xml	5.99689e-15
1536	diffusion	TAZ_model_2021-12-29_11.33.27.xml	8.55106
1537	diffusion_phosph	TAZ_model_2021-12-29_11.33.27.xml	1.03506
1538	phosphorylation	TAZ_model_2021-12-29_11.33.27.xml	0.191461
1539	dephosporylation	TAZ_model_2021-12-29_11.33.27.xml	0.184019
1540	translation	TAZ_model_2021-12-29_11.33.27.xml	0.00849748
1541	degradation	TAZ_model_2021-12-29_11.33.27.xml	0.00937094
1542	import	TAZ_model_2021-12-29_11.33.27.xml	4.08075e-15
1543	export	TAZ_model_2021-12-29_11.33.27.xml	5.2069e-15
1544	diffusion	TAZ_model_2021-12-29_11.40.56.xml	8.8825
1545	diffusion_phosph	TAZ_model_2021-12-29_11.40.56.xml	1.16693
1546	phosphorylation	TAZ_model_2021-12-29_11.40.56.xml	0.175764
1547	dephosporylation	TAZ_model_2021-12-29_11.40.56.xml	0.0769972
1548	translation	TAZ_model_2021-12-29_11.40.56.xml	0.00491971
1549	degradation	TAZ_model_2021-12-29_11.40.56.xml	0.00981369
1550	import	TAZ_model_2021-12-29_11.40.56.xml	8.38773e-15
1551	export	TAZ_model_2021-12-29_11.40.56.xml	5.77687e-15
1552	diffusion	TAZ_model_2021-12-29_11.53.21.xml	6.92734
1553	diffusion_phosph	TAZ_model_2021-12-29_11.53.21.xml	1.0087
1554	phosphorylation	TAZ_model_2021-12-29_11.53.21.xml	0.248477
1555	dephosporylation	TAZ_model_2021-12-29_11.53.21.xml	0.220581
1556	translation	TAZ_model_2021-12-29_11.53.21.xml	0.00389225
1557	degradation	TAZ_model_2021-12-29_11.53.21.xml	0.00988472
1558	import	TAZ_model_2021-12-29_11.53.21.xml	4.63372e-15
1559	export	TAZ_model_2021-12-29_11.53.21.xml	2.72792e-15
1560	diffusion	TAZ_model_2021-12-29_12.18.31.xml	7.7253
1561	diffusion_phosph	TAZ_model_2021-12-29_12.18.31.xml	1.05095
1562	phosphorylation	TAZ_model_2021-12-29_12.18.31.xml	0.457453
1563	dephosporylation	TAZ_model_2021-12-29_12.18.31.xml	0.148338
1564	translation	TAZ_model_2021-12-29_12.18.31.xml	0.00404435
1565	degradation	TAZ_model_2021-12-29_12.18.31.xml	0.00980508
1566	import	TAZ_model_2021-12-29_12.18.31.xml	8.98498e-15
1567	export	TAZ_model_2021-12-29_12.18.31.xml	1.61465e-15
1568	diffusion	TAZ_model_2021-12-29_12.22.12.xml	8.8002
1569	diffusion_phosph	TAZ_model_2021-12-29_12.22.12.xml	1.0337
1570	phosphorylation	TAZ_model_2021-12-29_12.22.12.xml	0.0842076
1571	dephosporylation	TAZ_model_2021-12-29_12.22.12.xml	0.114748
1572	translation	TAZ_model_2021-12-29_12.22.12.xml	0.00109153
1573	degradation	TAZ_model_2021-12-29_12.22.12.xml	0.00912765
1574	import	TAZ_model_2021-12-29_12.22.12.xml	3.80888e-15
1575	export	TAZ_model_2021-12-29_12.22.12.xml	5.73004e-15
1576	diffusion	TAZ_model_2021-12-29_12.39.35.xml	8.0126
1577	diffusion_phosph	TAZ_model_2021-12-29_12.39.35.xml	1.0047
1578	phosphorylation	TAZ_model_2021-12-29_12.39.35.xml	0.369434
1579	dephosporylation	TAZ_model_2021-12-29_12.39.35.xml	0.0536971
1580	translation	TAZ_model_2021-12-29_12.39.35.xml	0.00124978
1581	degradation	TAZ_model_2021-12-29_12.39.35.xml	0.0097924
1582	import	TAZ_model_2021-12-29_12.39.35.xml	6.13261e-15
1583	export	TAZ_model_2021-12-29_12.39.35.xml	2.0348e-15
1584	diffusion	TAZ_model_2021-12-29_12.52.08.xml	7.42775
1585	diffusion_phosph	TAZ_model_2021-12-29_12.52.08.xml	1.08454
1586	phosphorylation	TAZ_model_2021-12-29_12.52.08.xml	0.225591
1587	dephosporylation	TAZ_model_2021-12-29_12.52.08.xml	0.0558201
1588	translation	TAZ_model_2021-12-29_12.52.08.xml	0.0077378
1589	degradation	TAZ_model_2021-12-29_12.52.08.xml	0.00971134
1590	import	TAZ_model_2021-12-29_12.52.08.xml	9.67884e-15
1591	export	TAZ_model_2021-12-29_12.52.08.xml	4.34343e-15
1592	diffusion	TAZ_model_2021-12-29_13.06.39.xml	8.44663
1593	diffusion_phosph	TAZ_model_2021-12-29_13.06.39.xml	1.05033
1594	phosphorylation	TAZ_model_2021-12-29_13.06.39.xml	0.245479
1595	dephosporylation	TAZ_model_2021-12-29_13.06.39.xml	0.0615214
1596	translation	TAZ_model_2021-12-29_13.06.39.xml	0.00121836
1597	degradation	TAZ_model_2021-12-29_13.06.39.xml	0.00958022
1598	import	TAZ_model_2021-12-29_13.06.39.xml	4.20514e-15
1599	export	TAZ_model_2021-12-29_13.06.39.xml	9.22269e-15
