# Supplementary figures and images for: Spatial modeling reveals nuclear phosphorylation and subcellular shuttling of YAP upon drug-induced liver injury
Source: eLife journal article supplement (doi:10.7554/elife.78540), 2022-09-22

Figure S1A supporting data

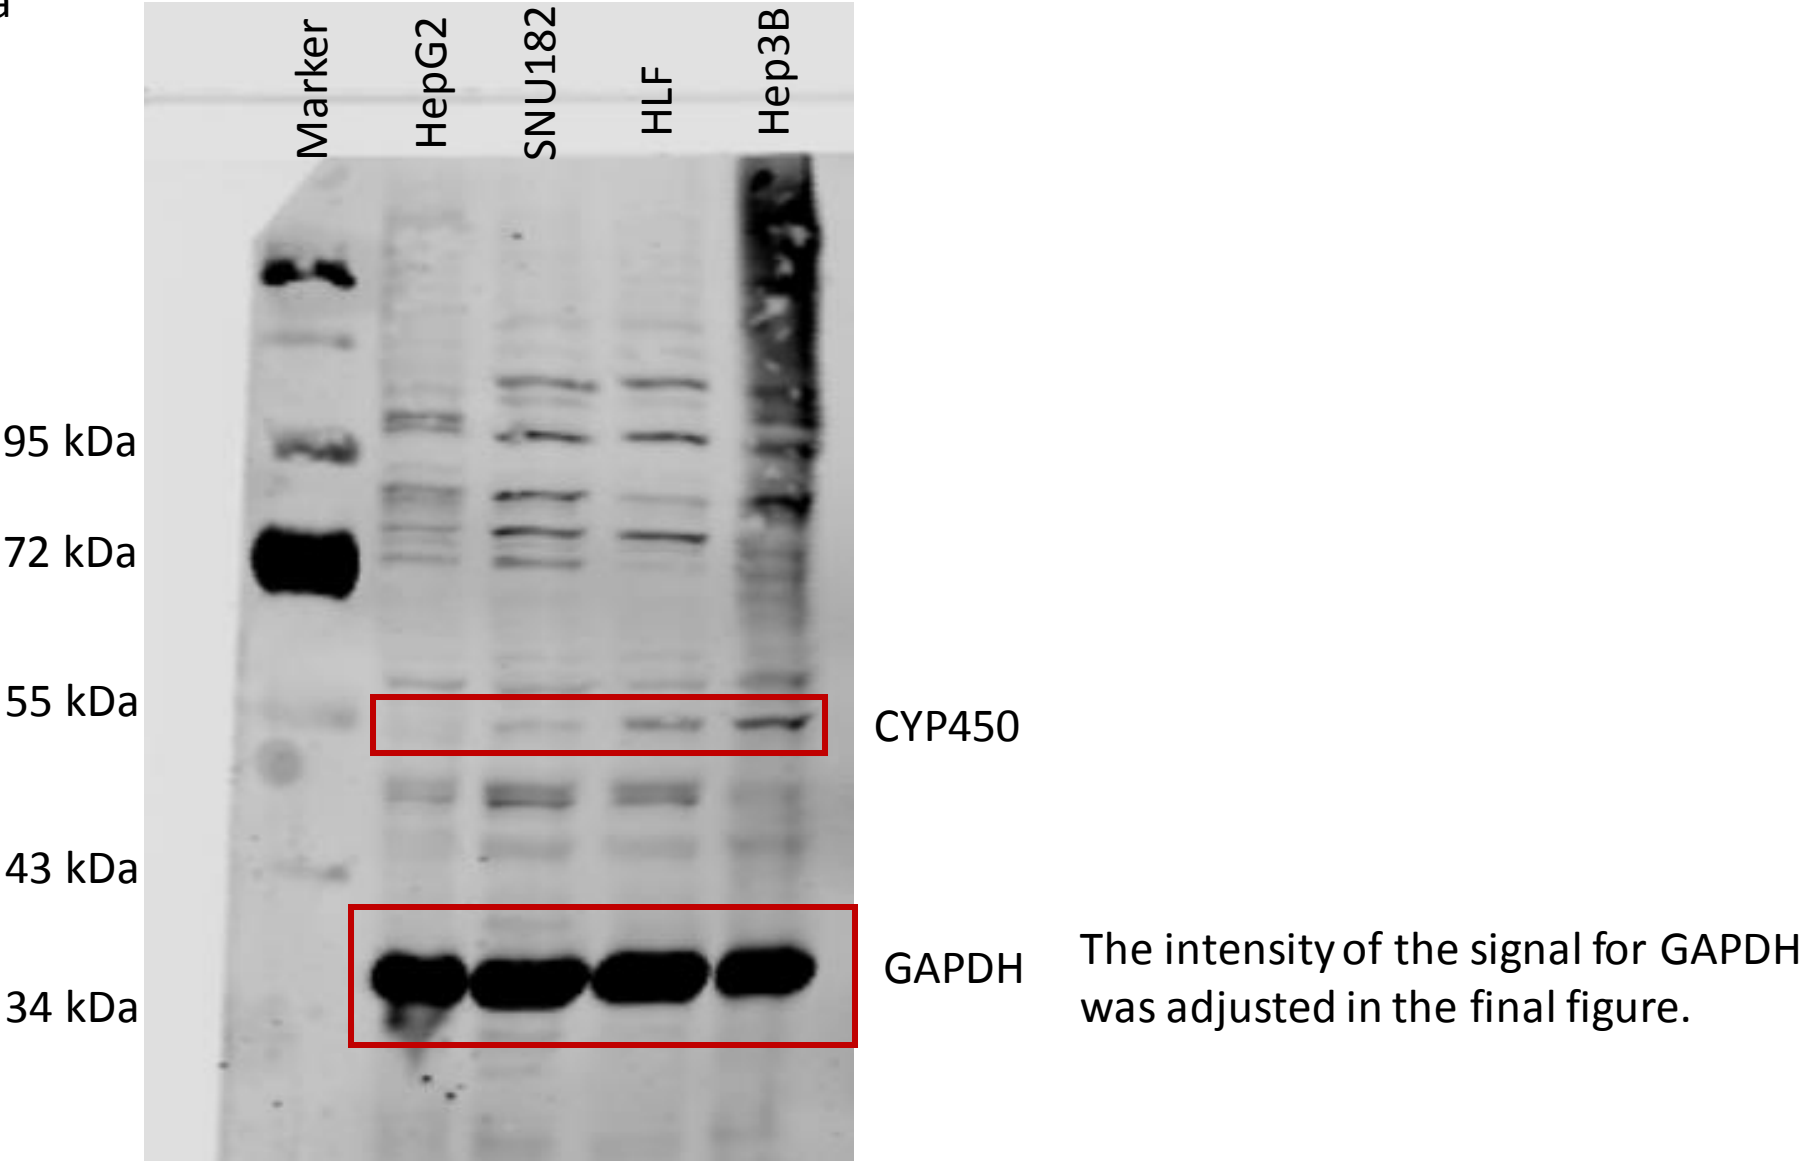

Supplement: fig1-figsupp1-data1 [file elife-78540-fig1-figsupp1-data1-v1.zip]

Figure 2 F

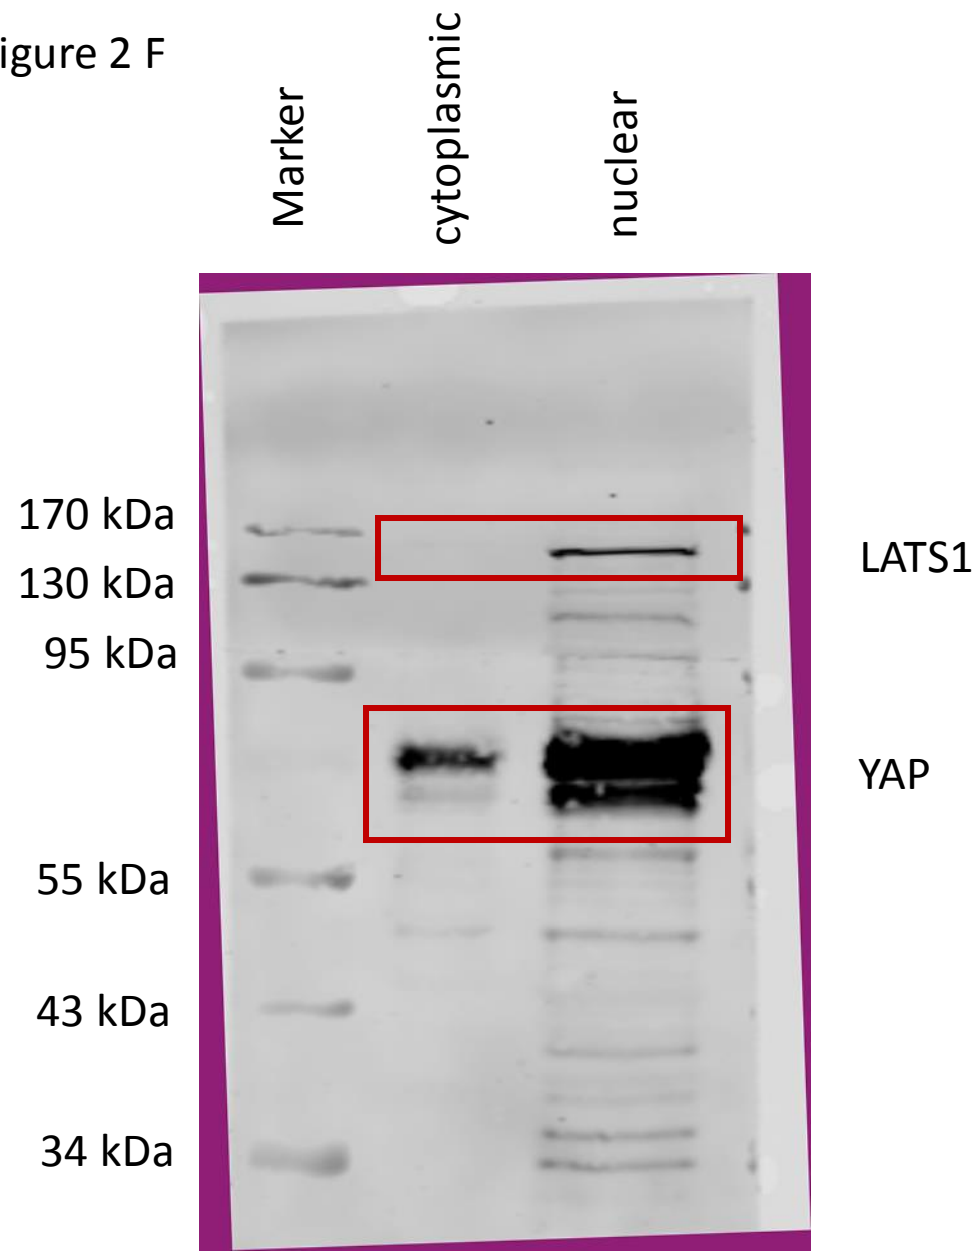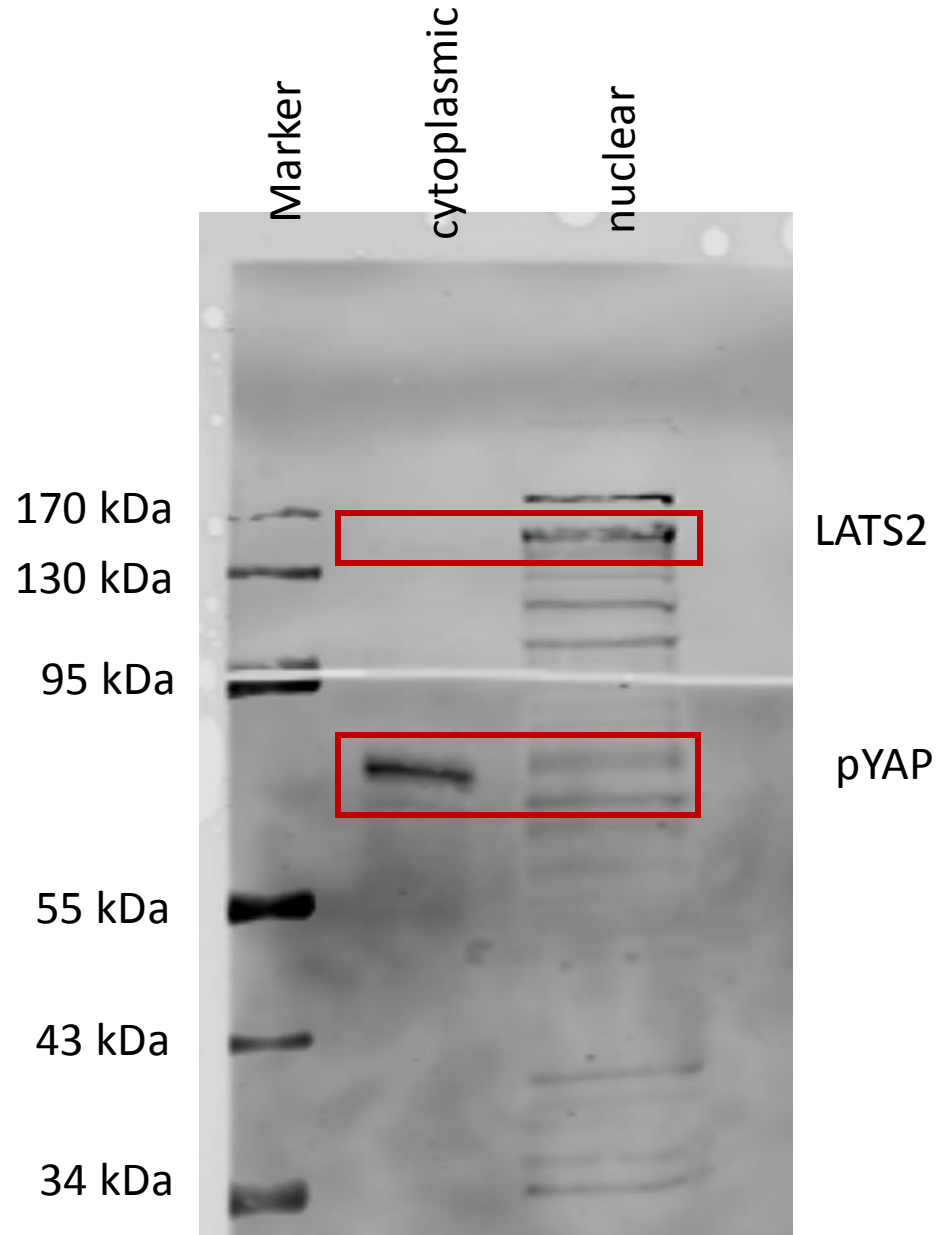

Figure 2 F

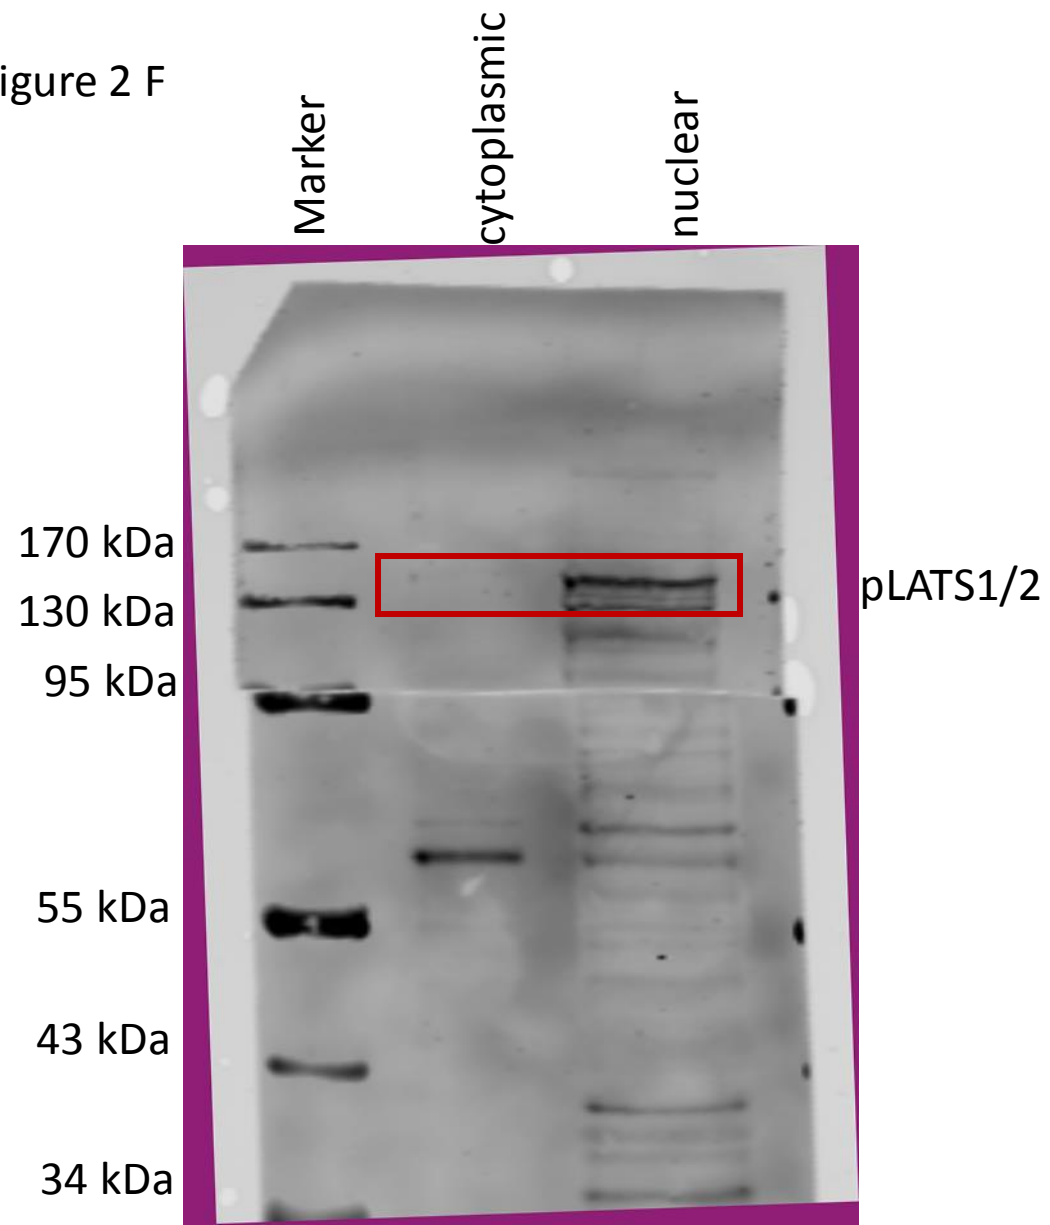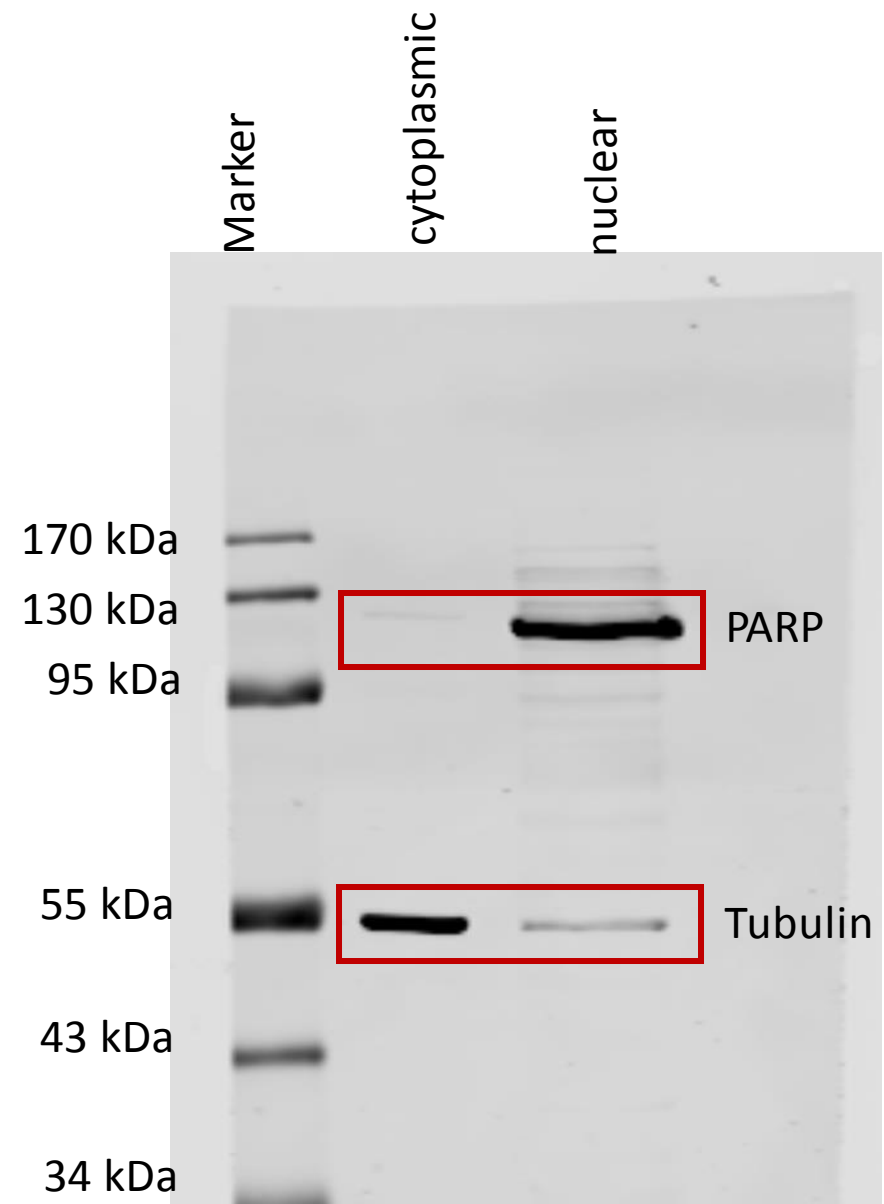

Supplement: fig2-data1 [file Figure 2 source data.pdf › Figure 2-source data/Figure 2 source data.pdf]

Fig 3C: 0.5 – 5 hours

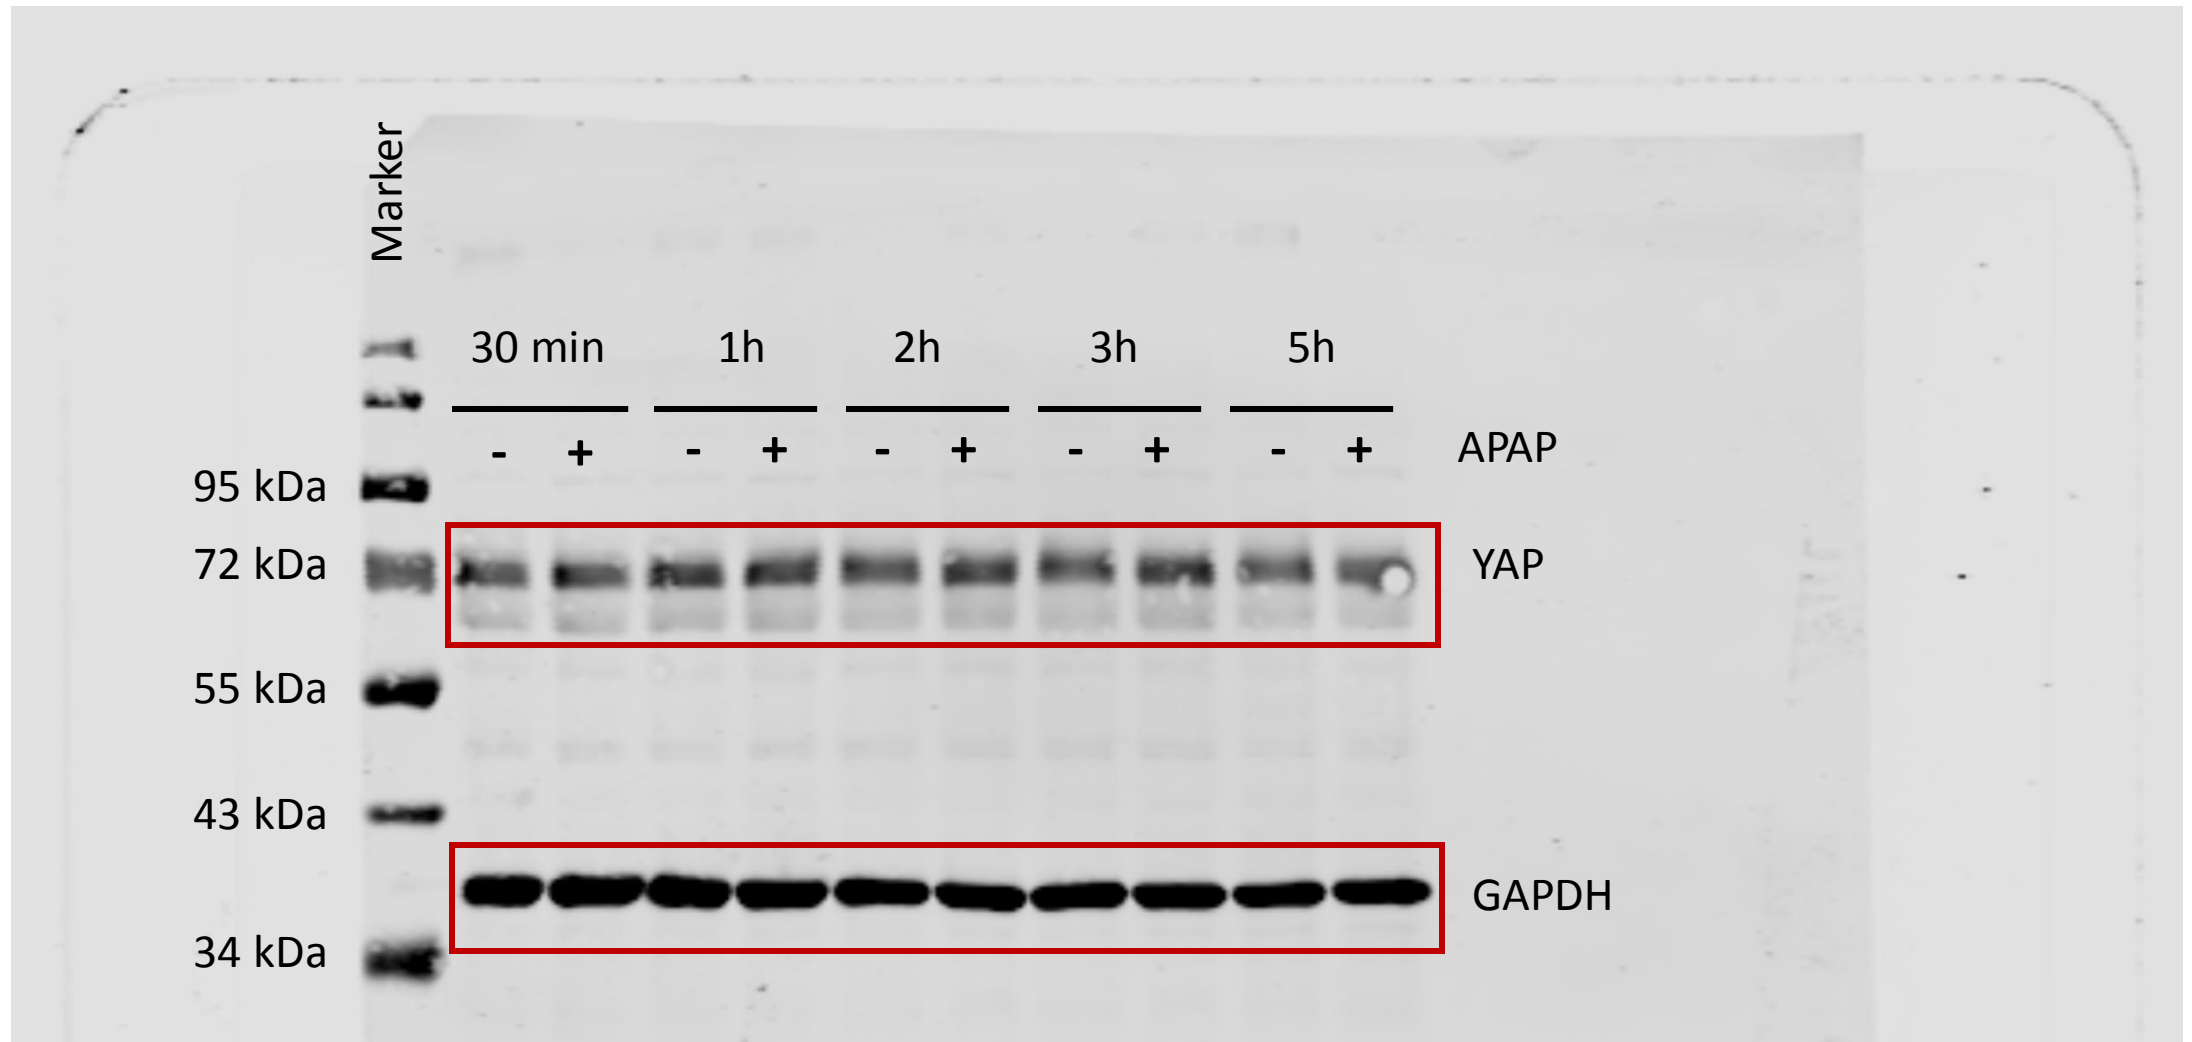

Fig 3C: 0.5 – 5 hours

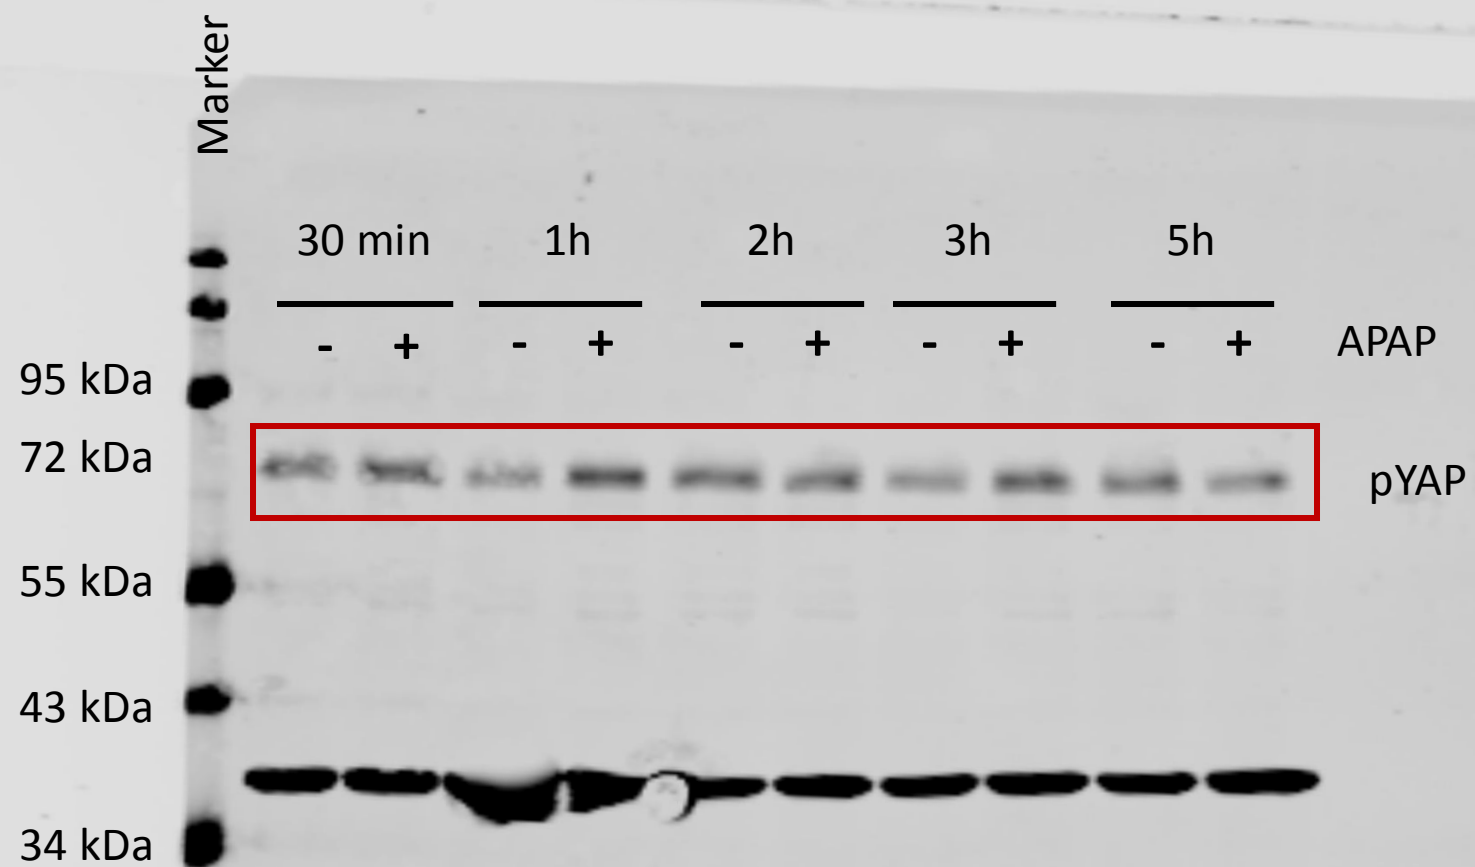

Fig 3C: 6 – 48 hours

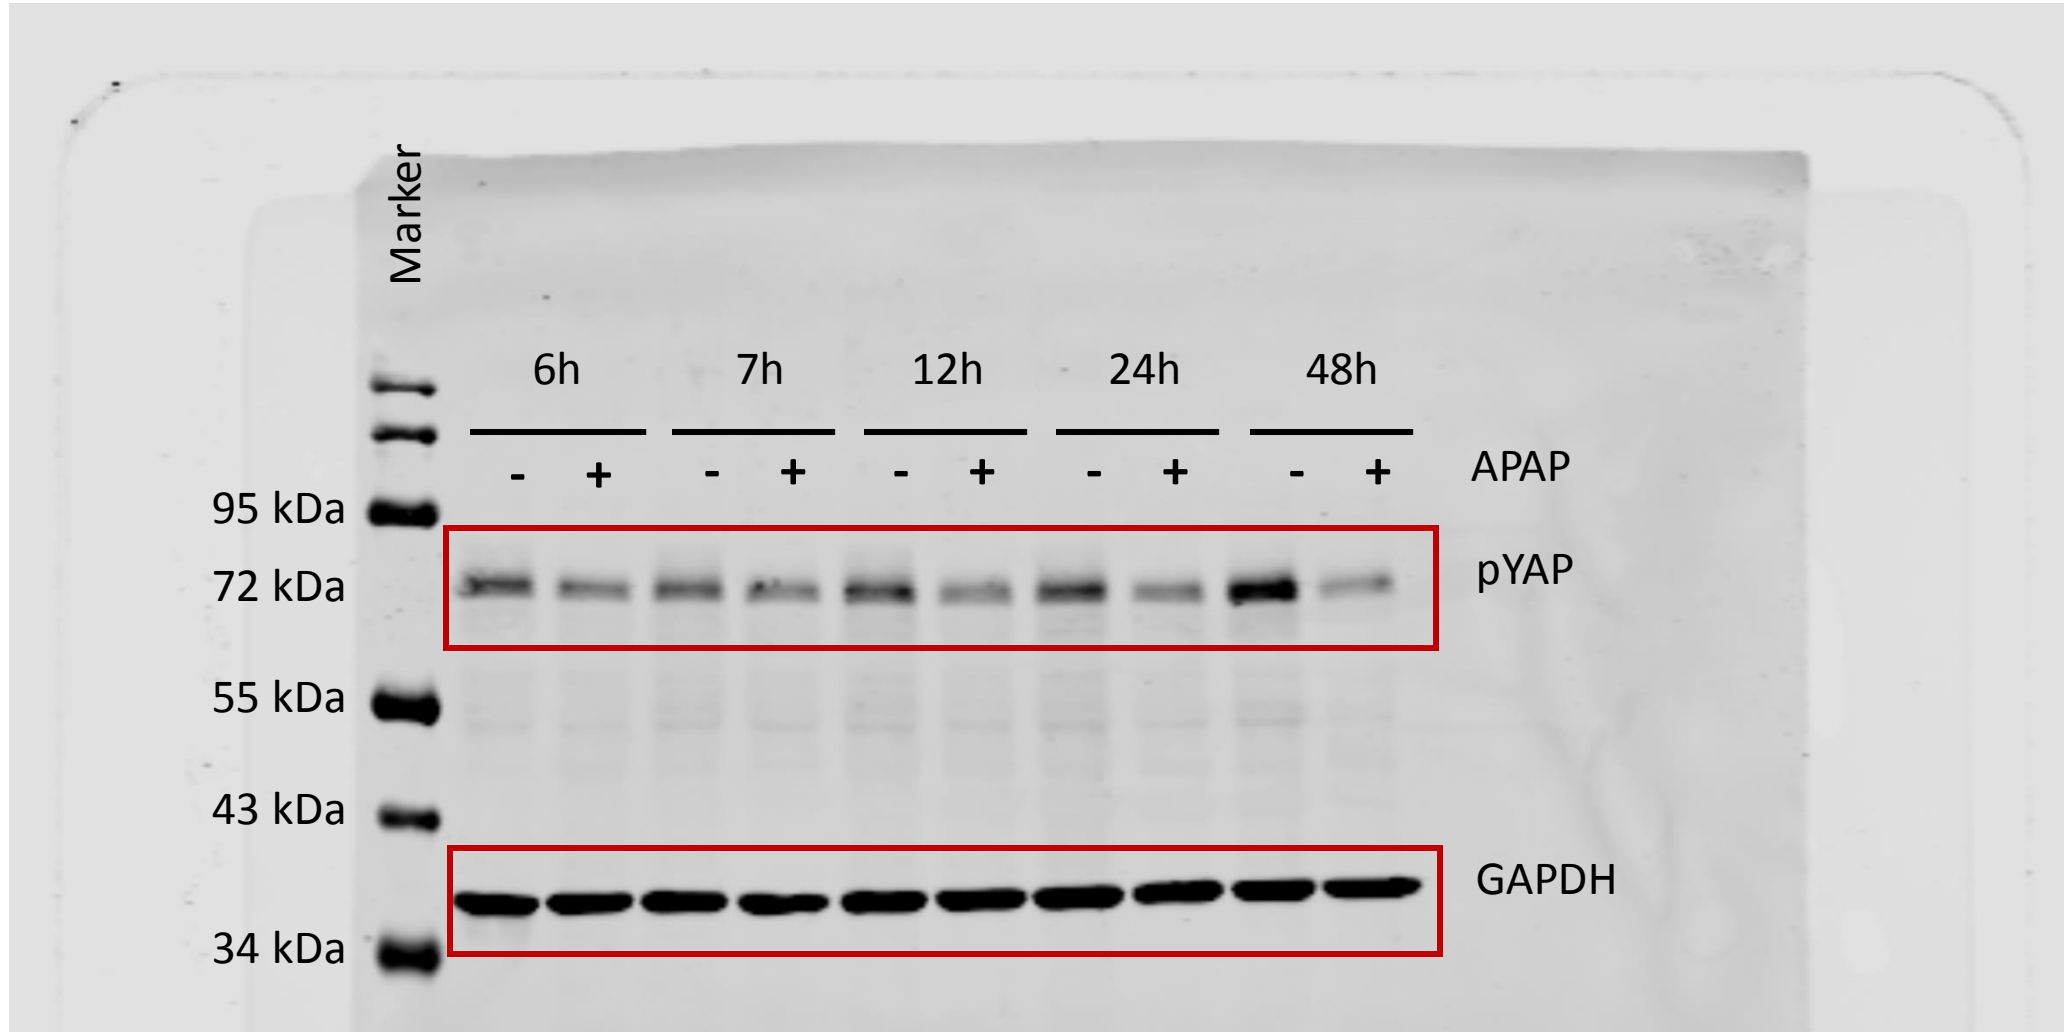

Fig 3C: 6 – 48 hours

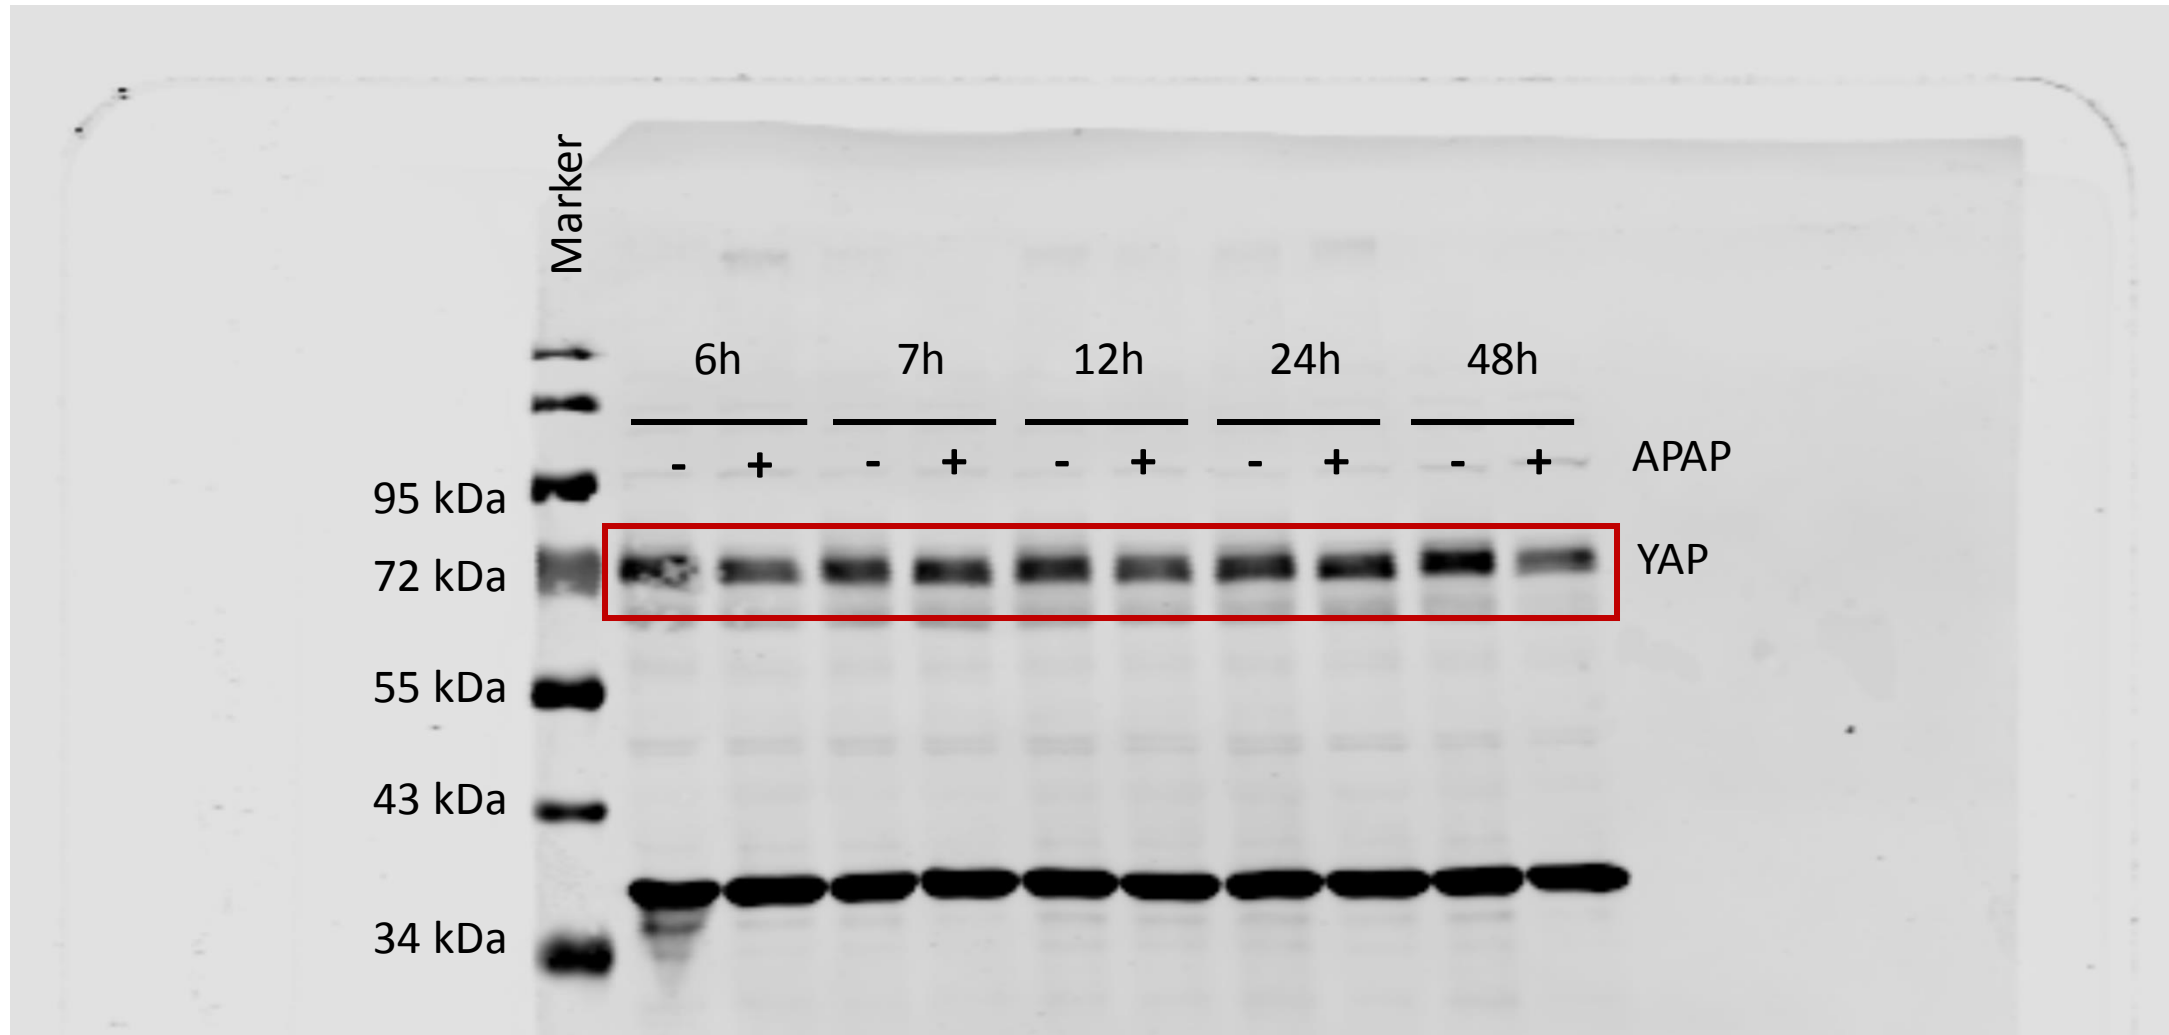

Supplement: fig3-data1 [file Figure 3 - source data.pdf › Figure 3-source data/Figure 3 - source data.pdf]

Figure S4 C

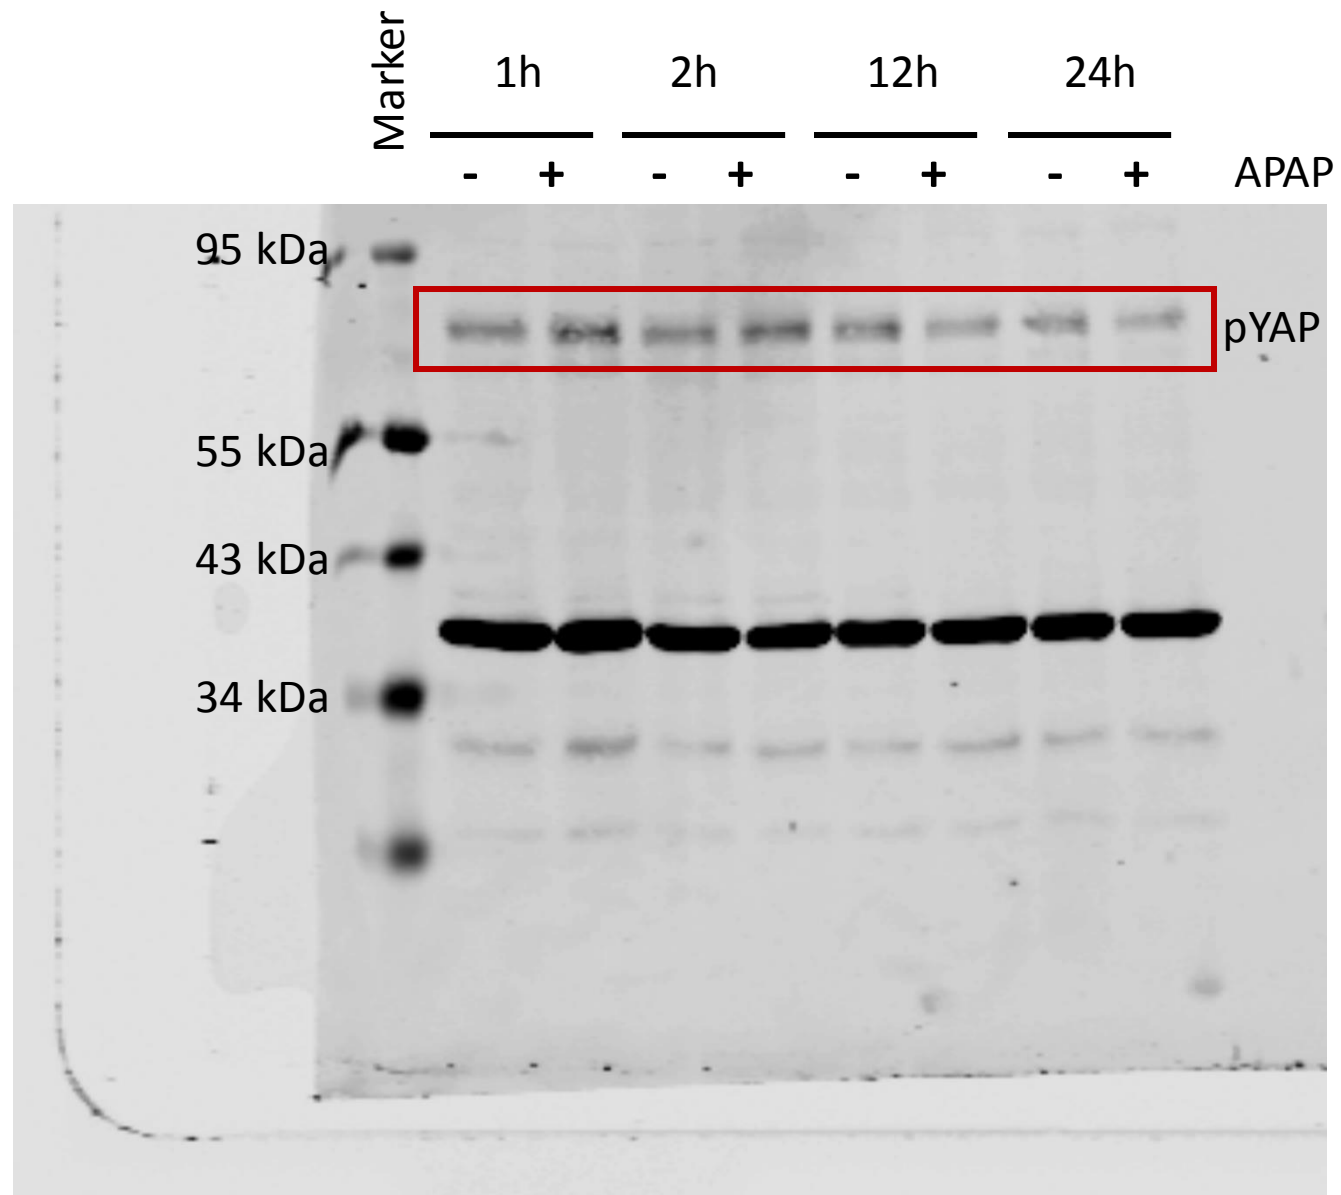

Figure S4 C

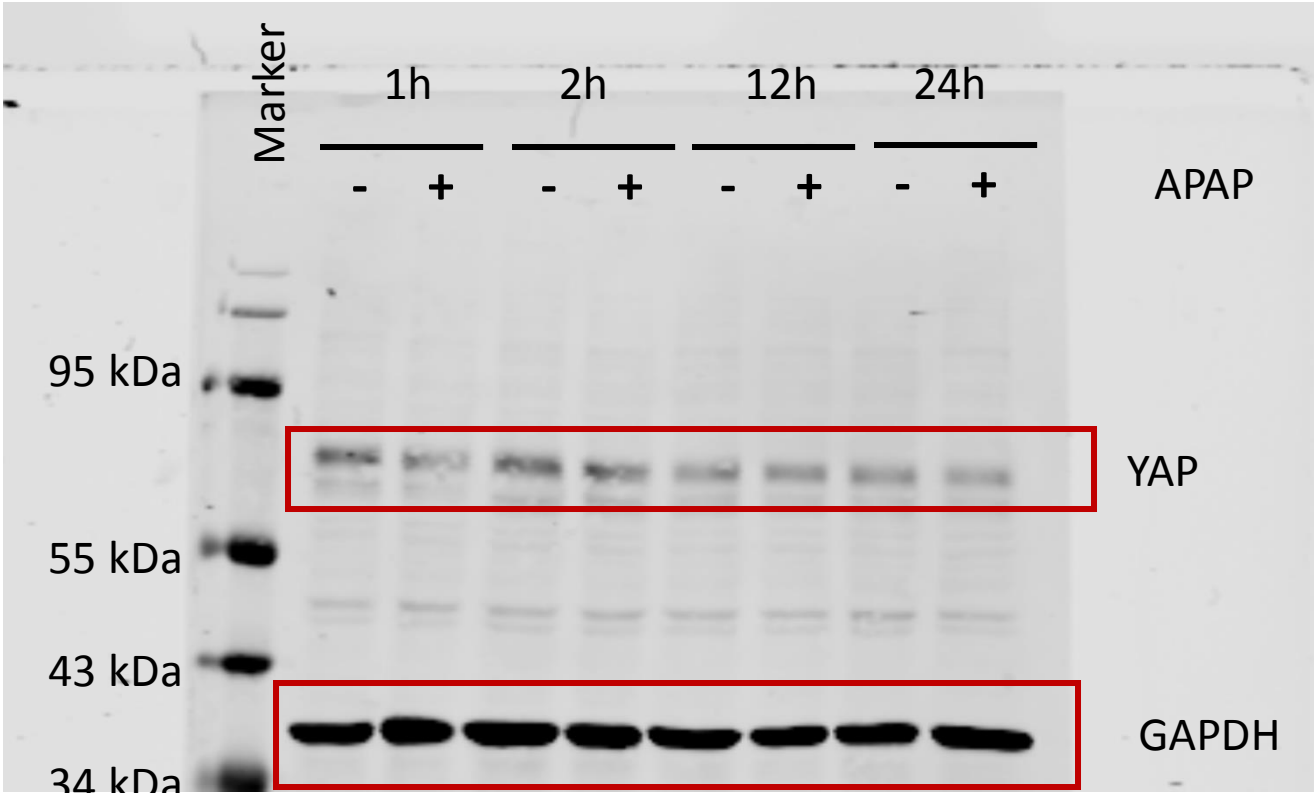

Supplement: fig3-figsupp1-data1 [file elife-78540-fig3-figsupp1-data1-v1.zip]

Fig 4 D (pYAP)

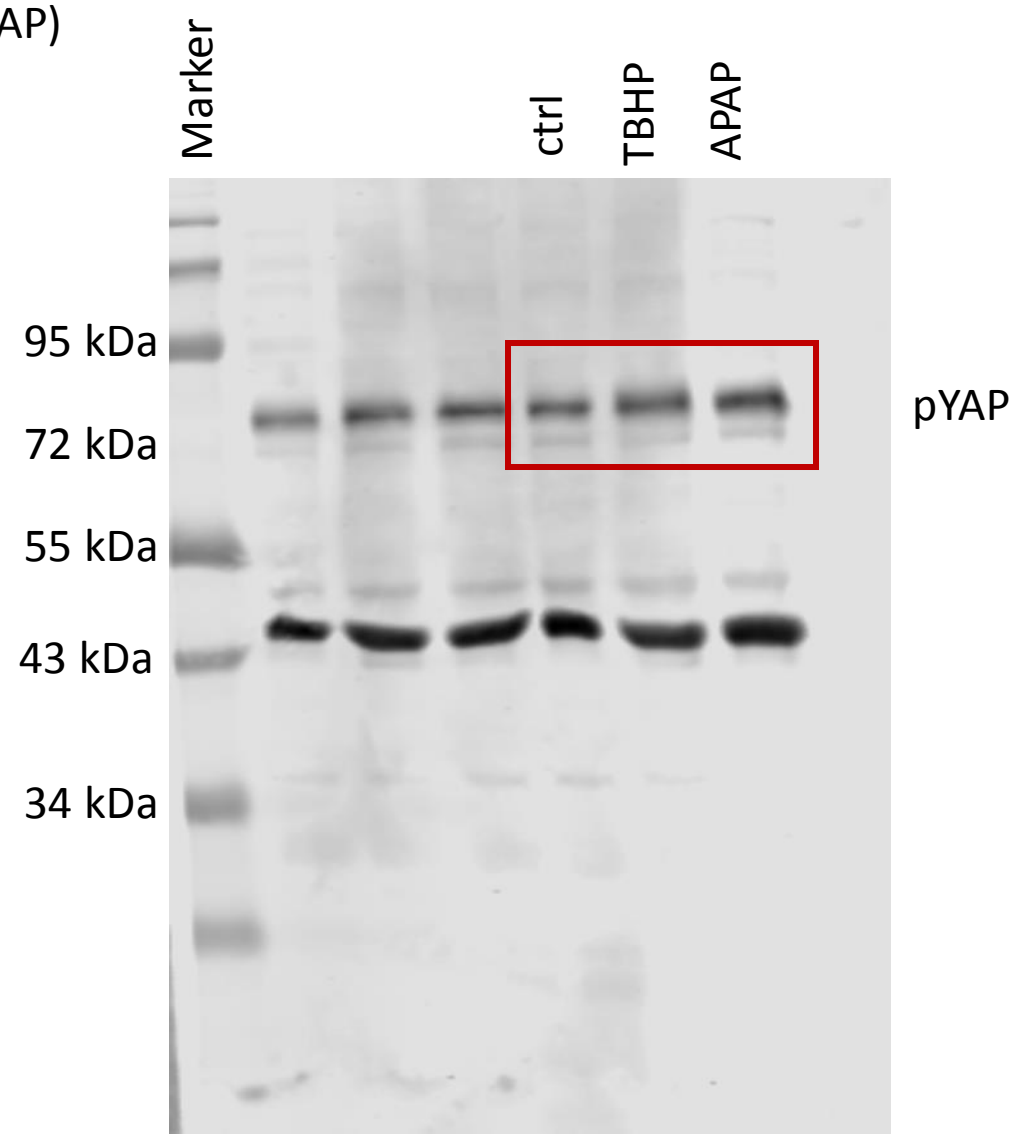

Fig 4 D (YAP)

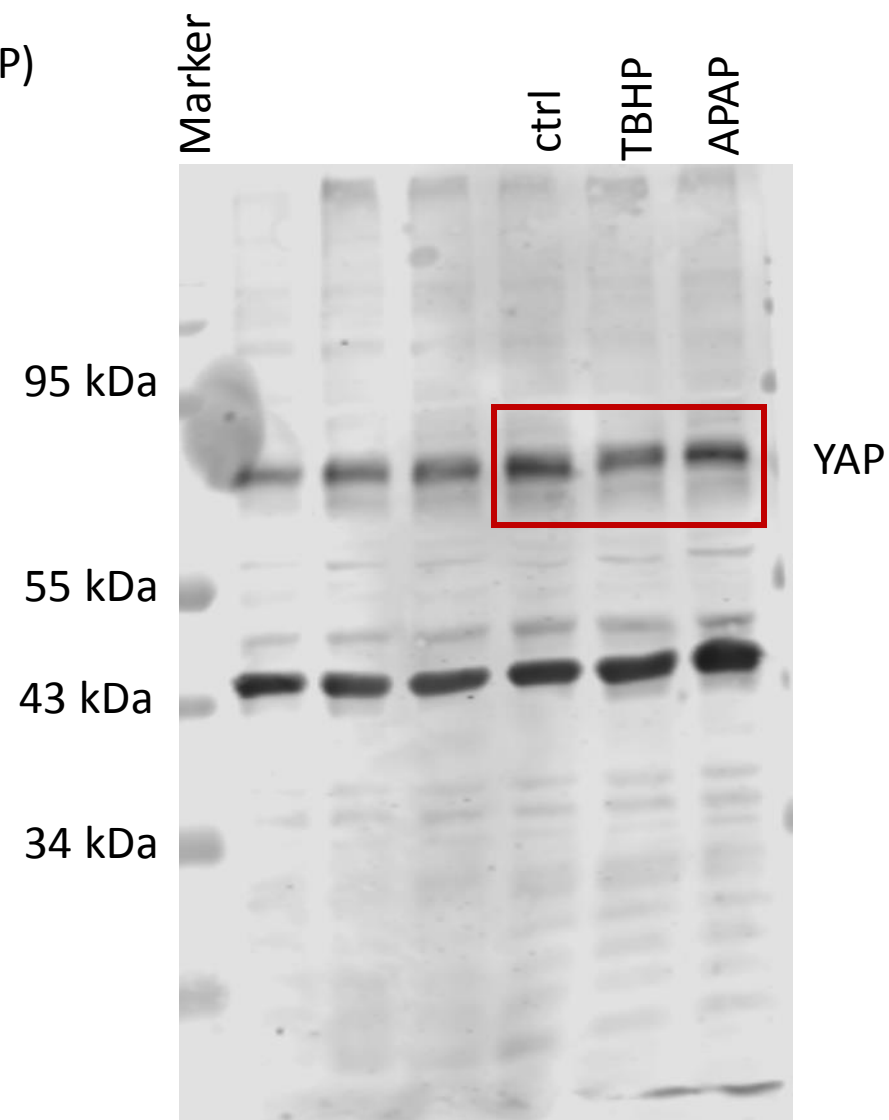

Fig 4 D (pAKT)

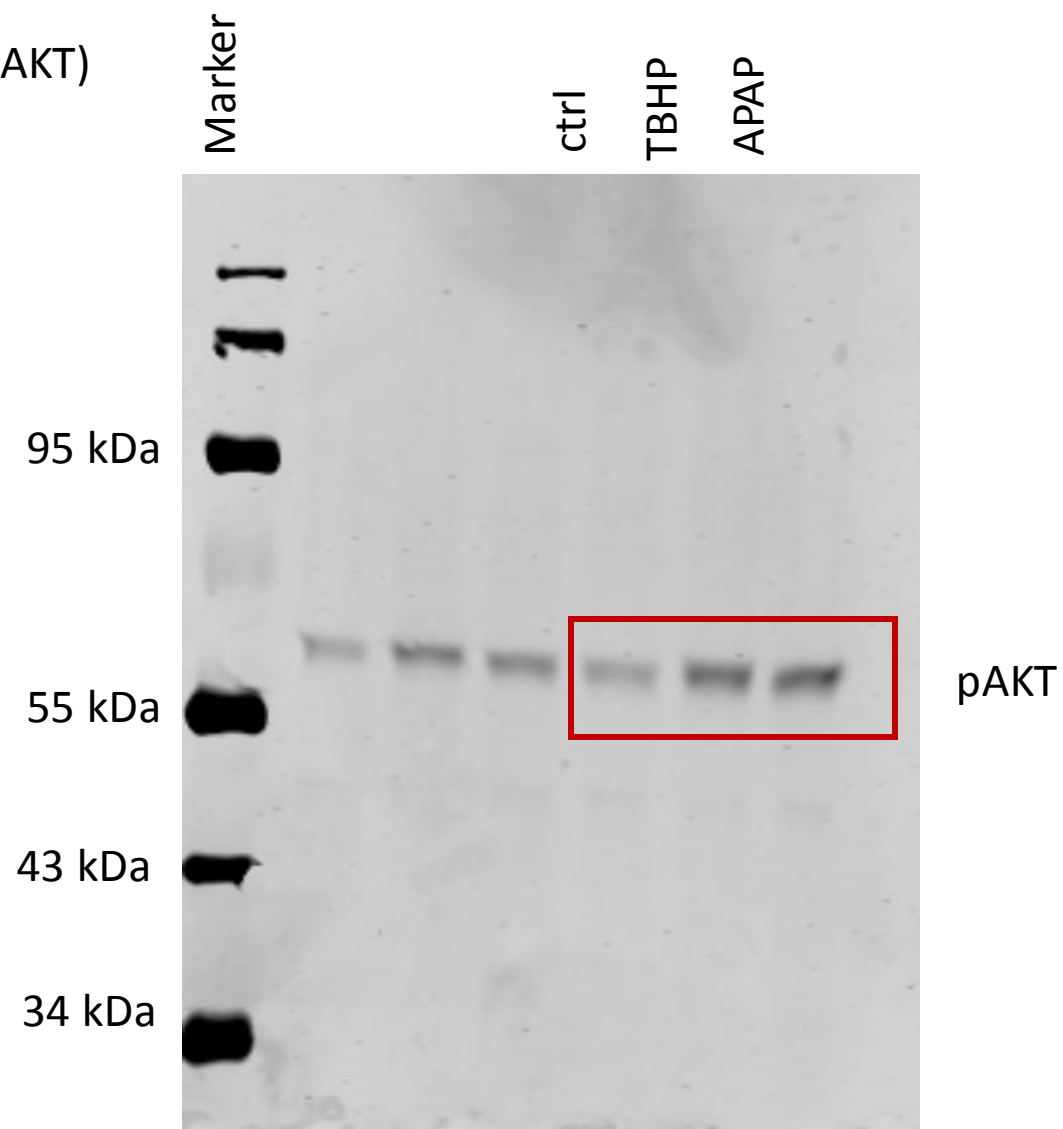

Fig 4 D (AKT + actin)

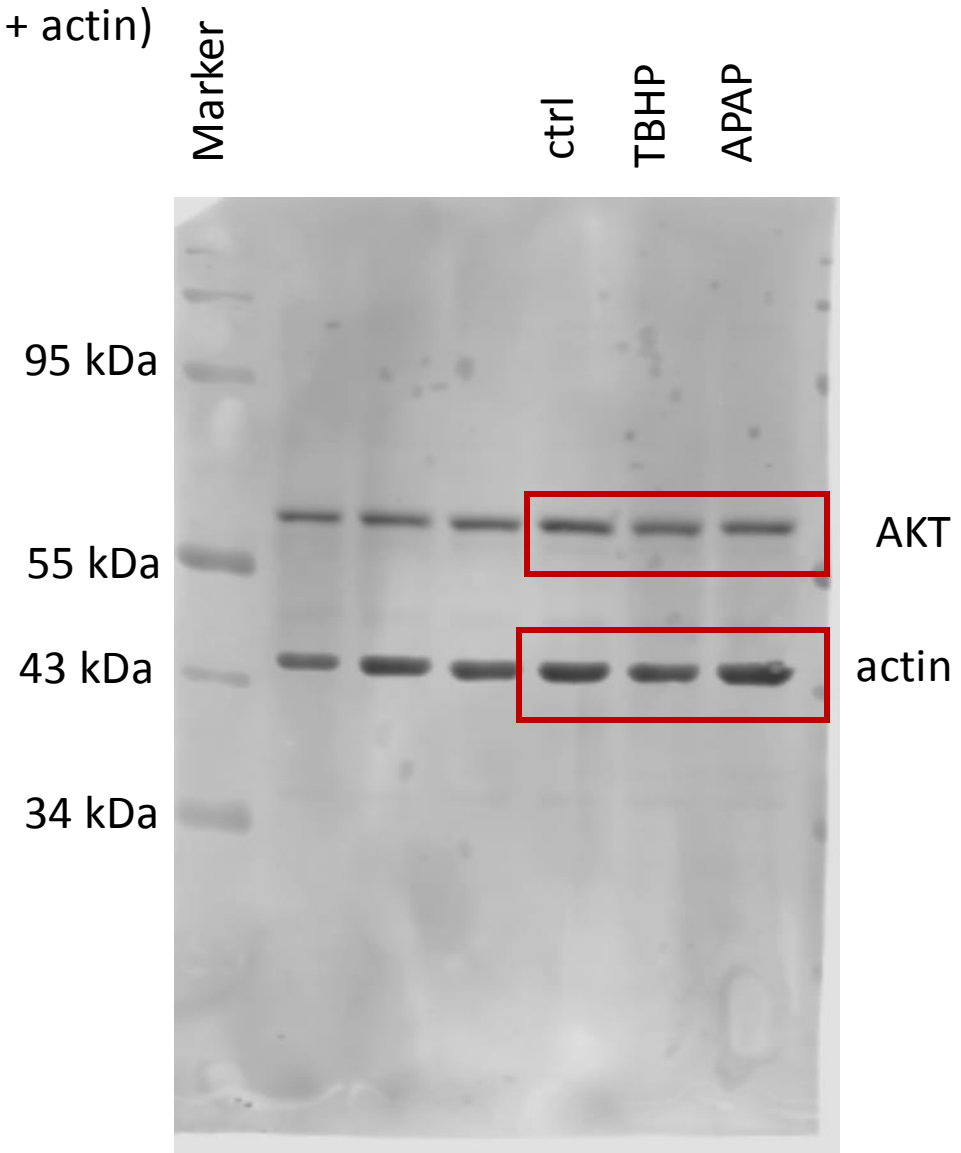

Supplement: fig4-data1 [file elife-78540-fig4-data1-v1.zip]

Fig 4 A (pYAP)

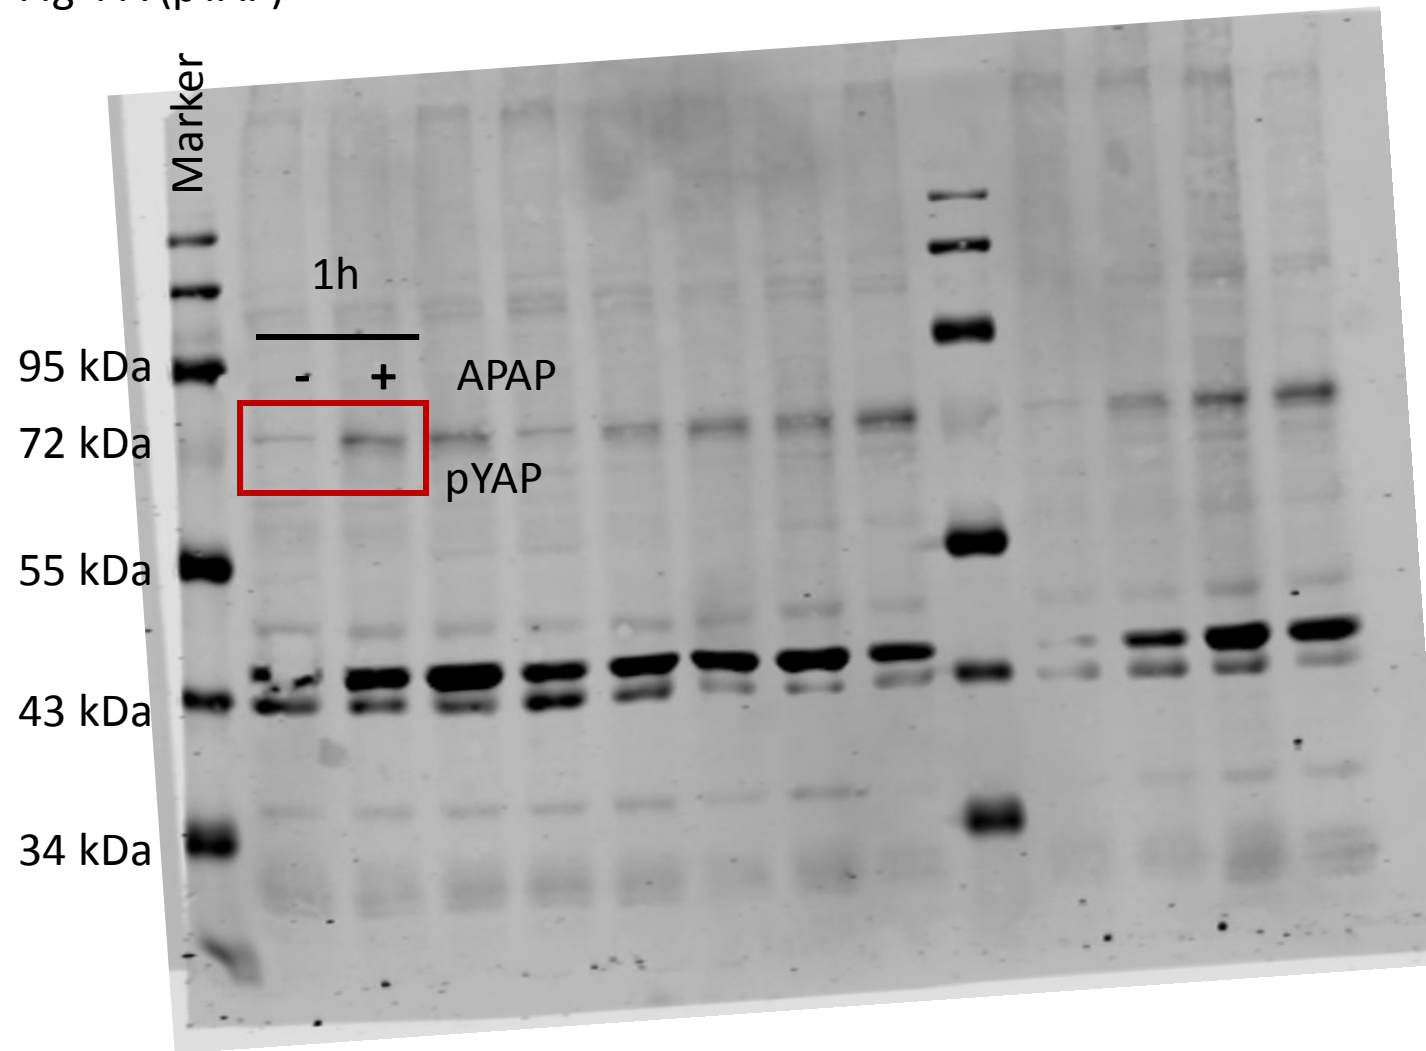

Fig 4 A (YAP)

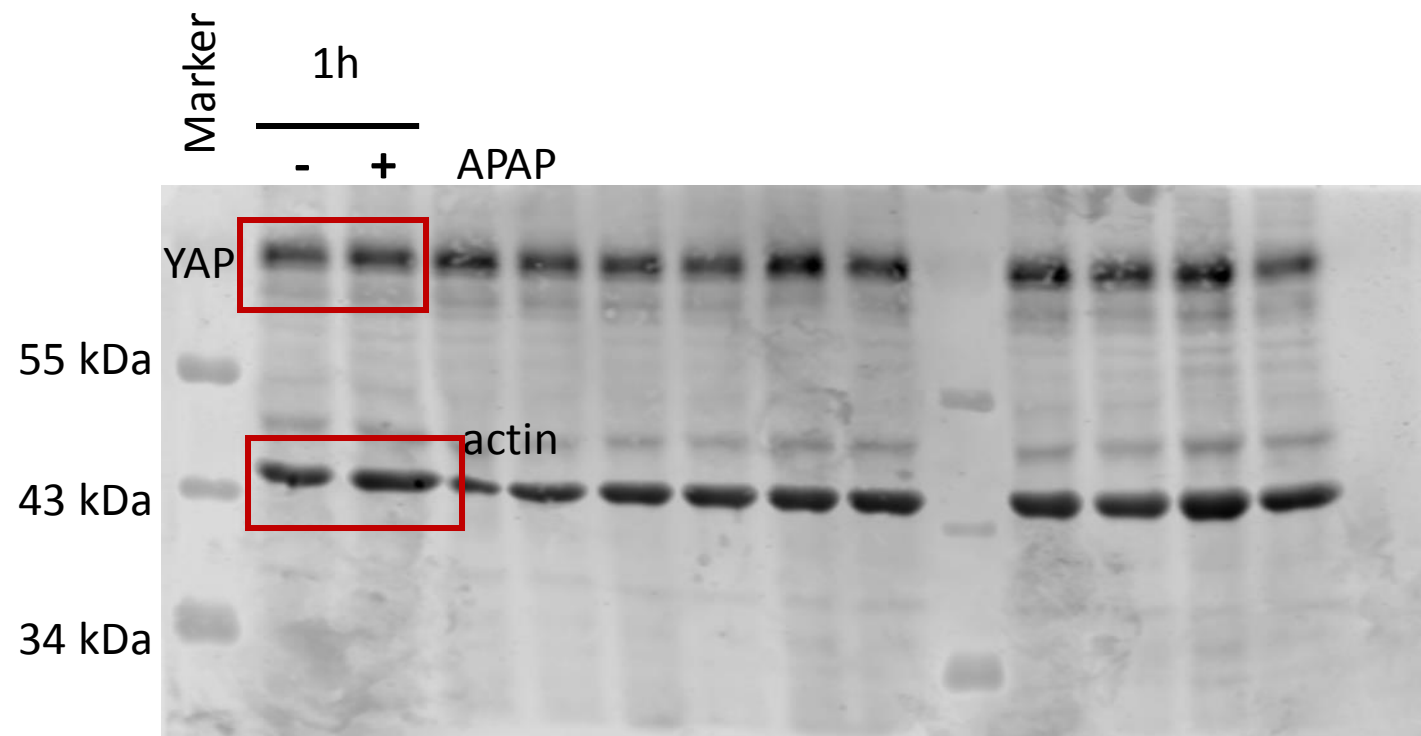

Fig 4 A (pAKT)

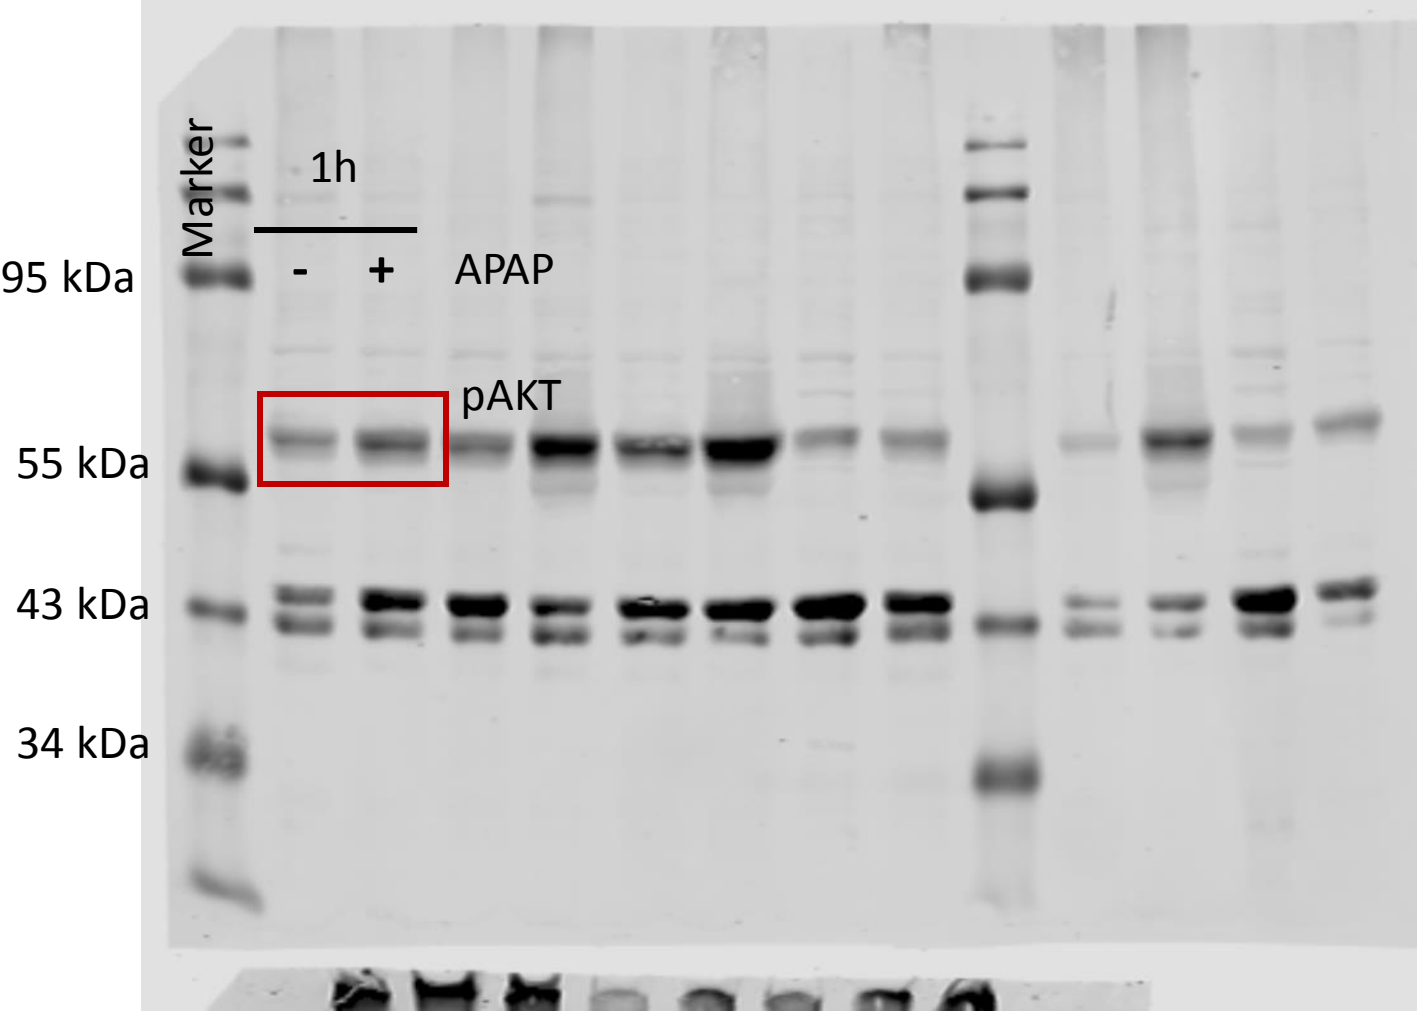

Fig 4 A (AKT)

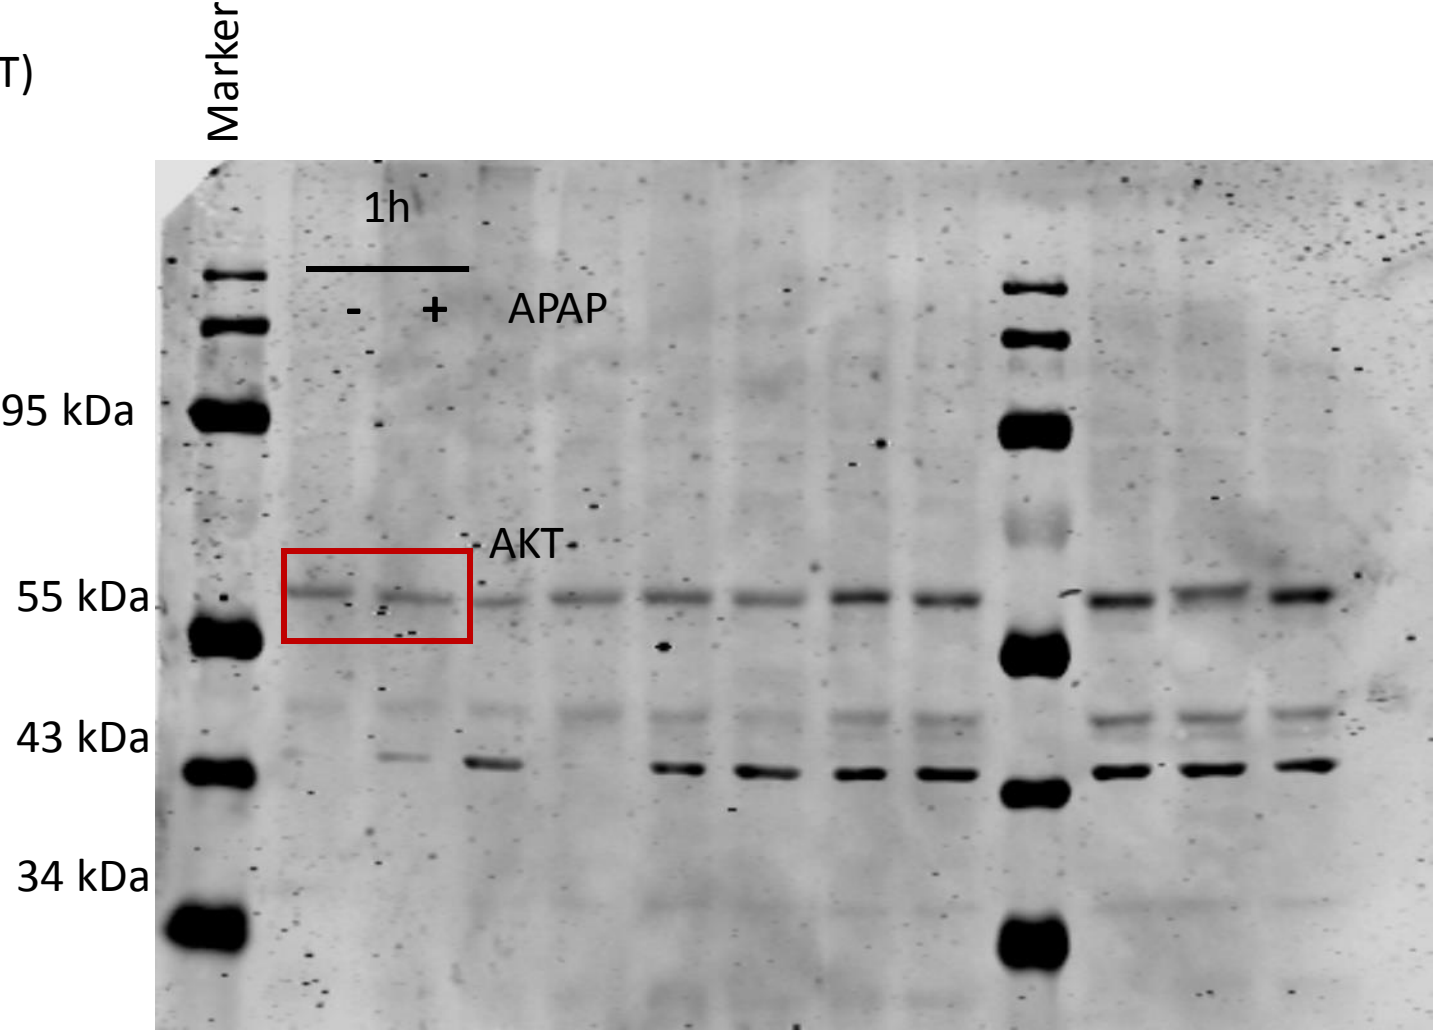

Supplement: fig4-data1 [file elife-78540-fig4-data1-v1.zip]

Fig 4F (pAKT)

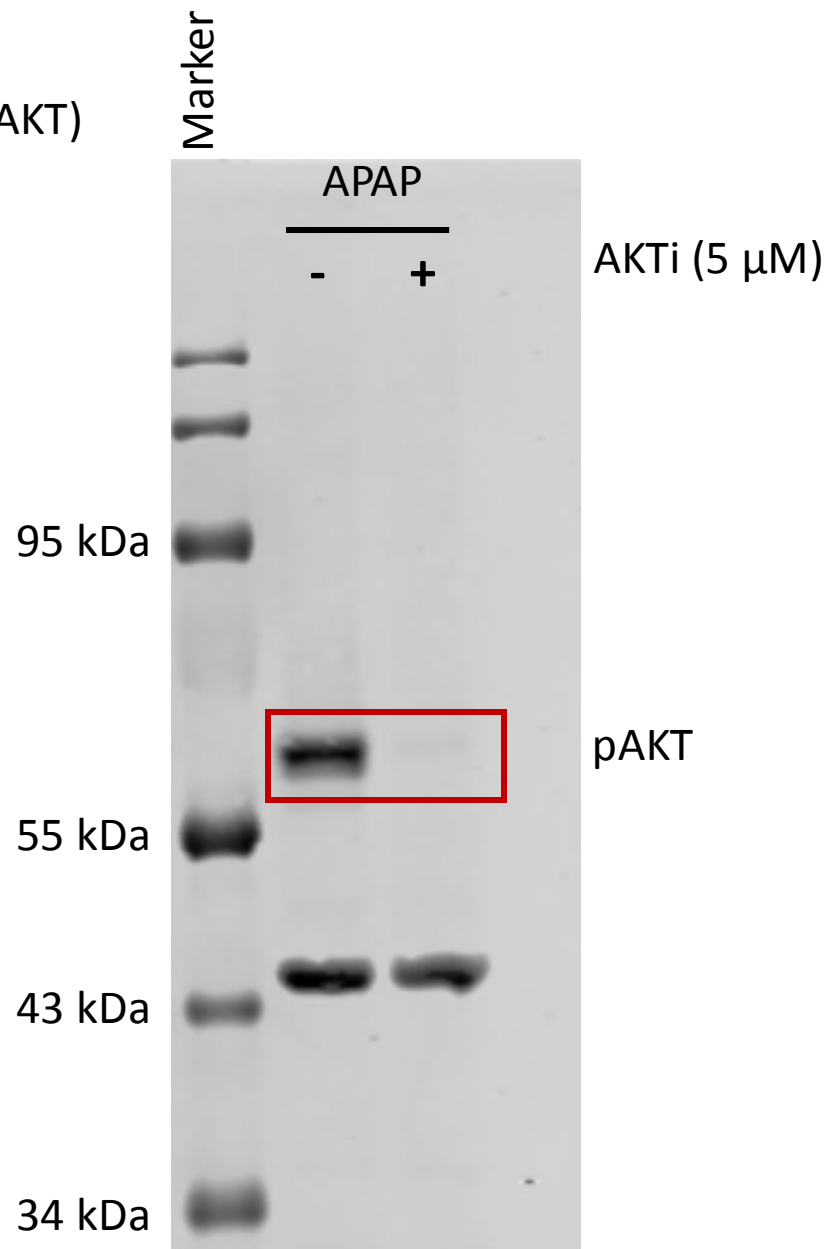

Fig 4F (AKT)

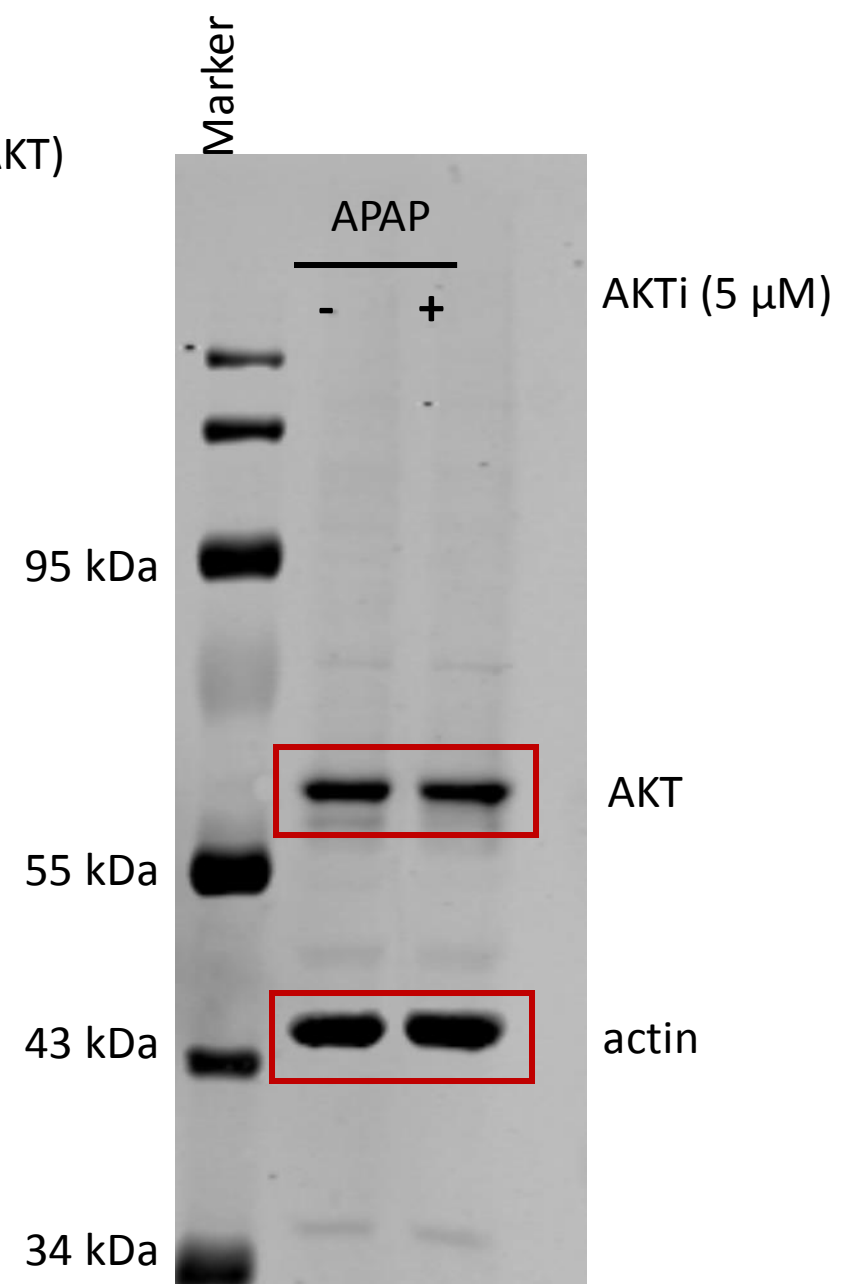

Fig 4F (pYAP)

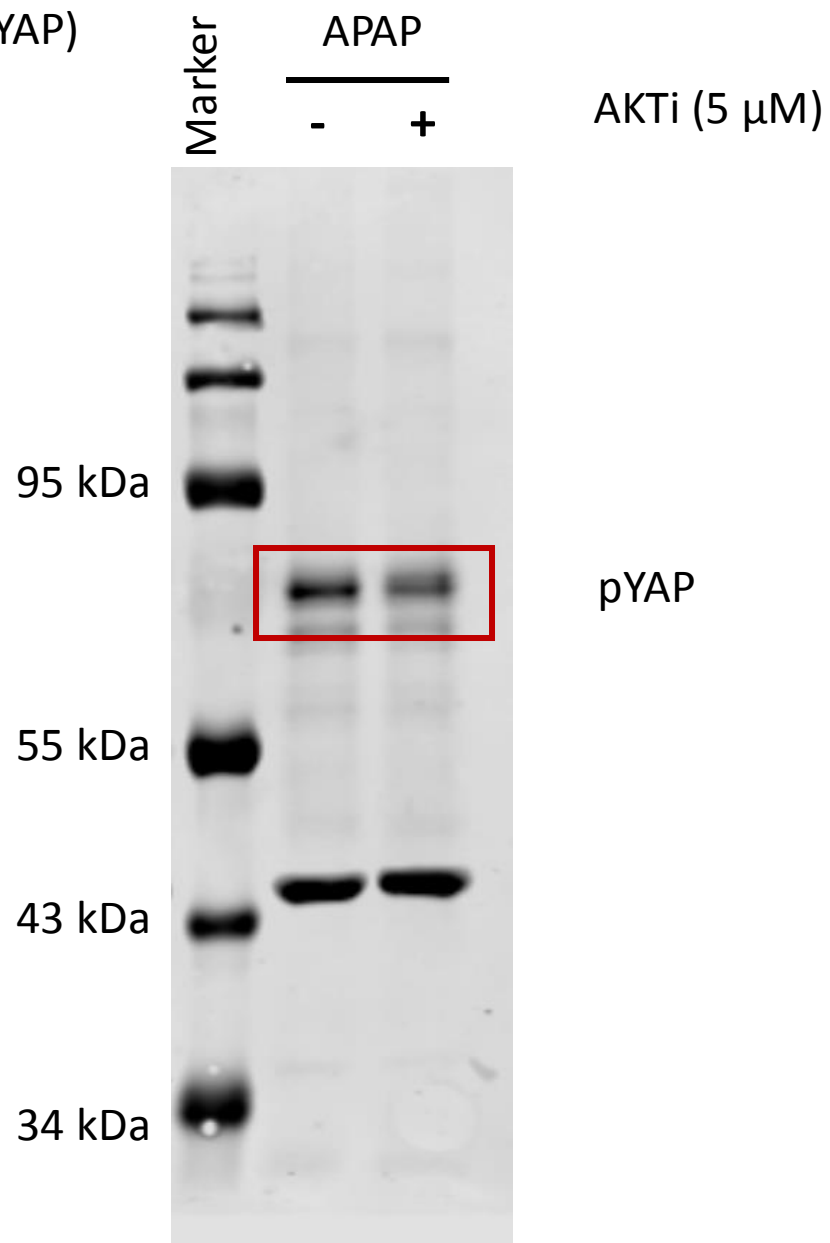

Fig 4F (YAP)

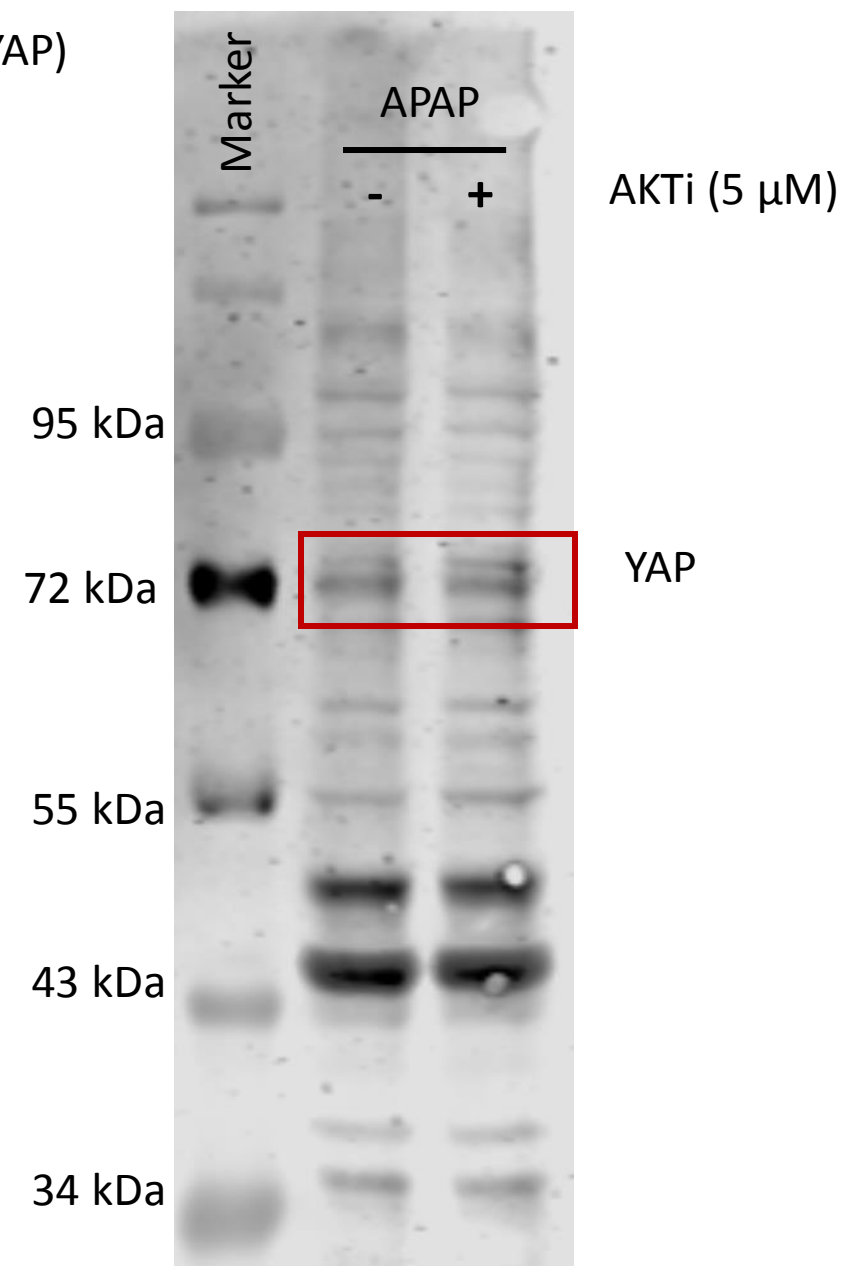

Supplement: fig4-data1 [file elife-78540-fig4-data1-v1.zip]

Fig 4 E

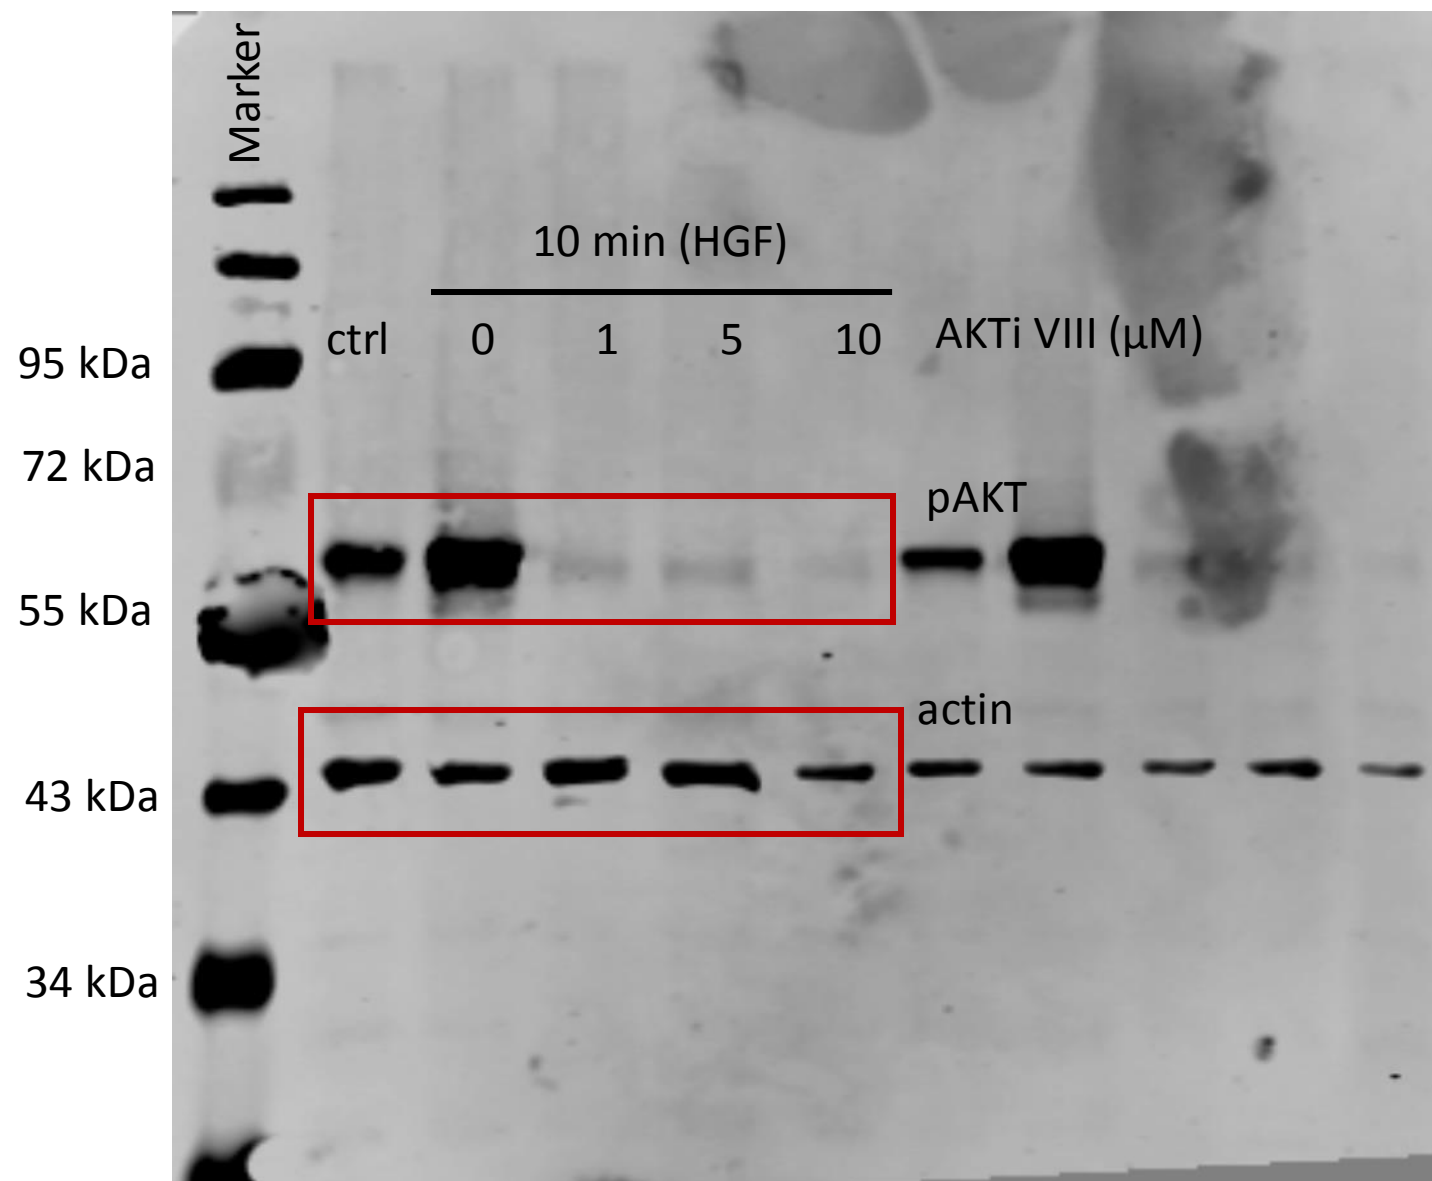

Fig 4 E

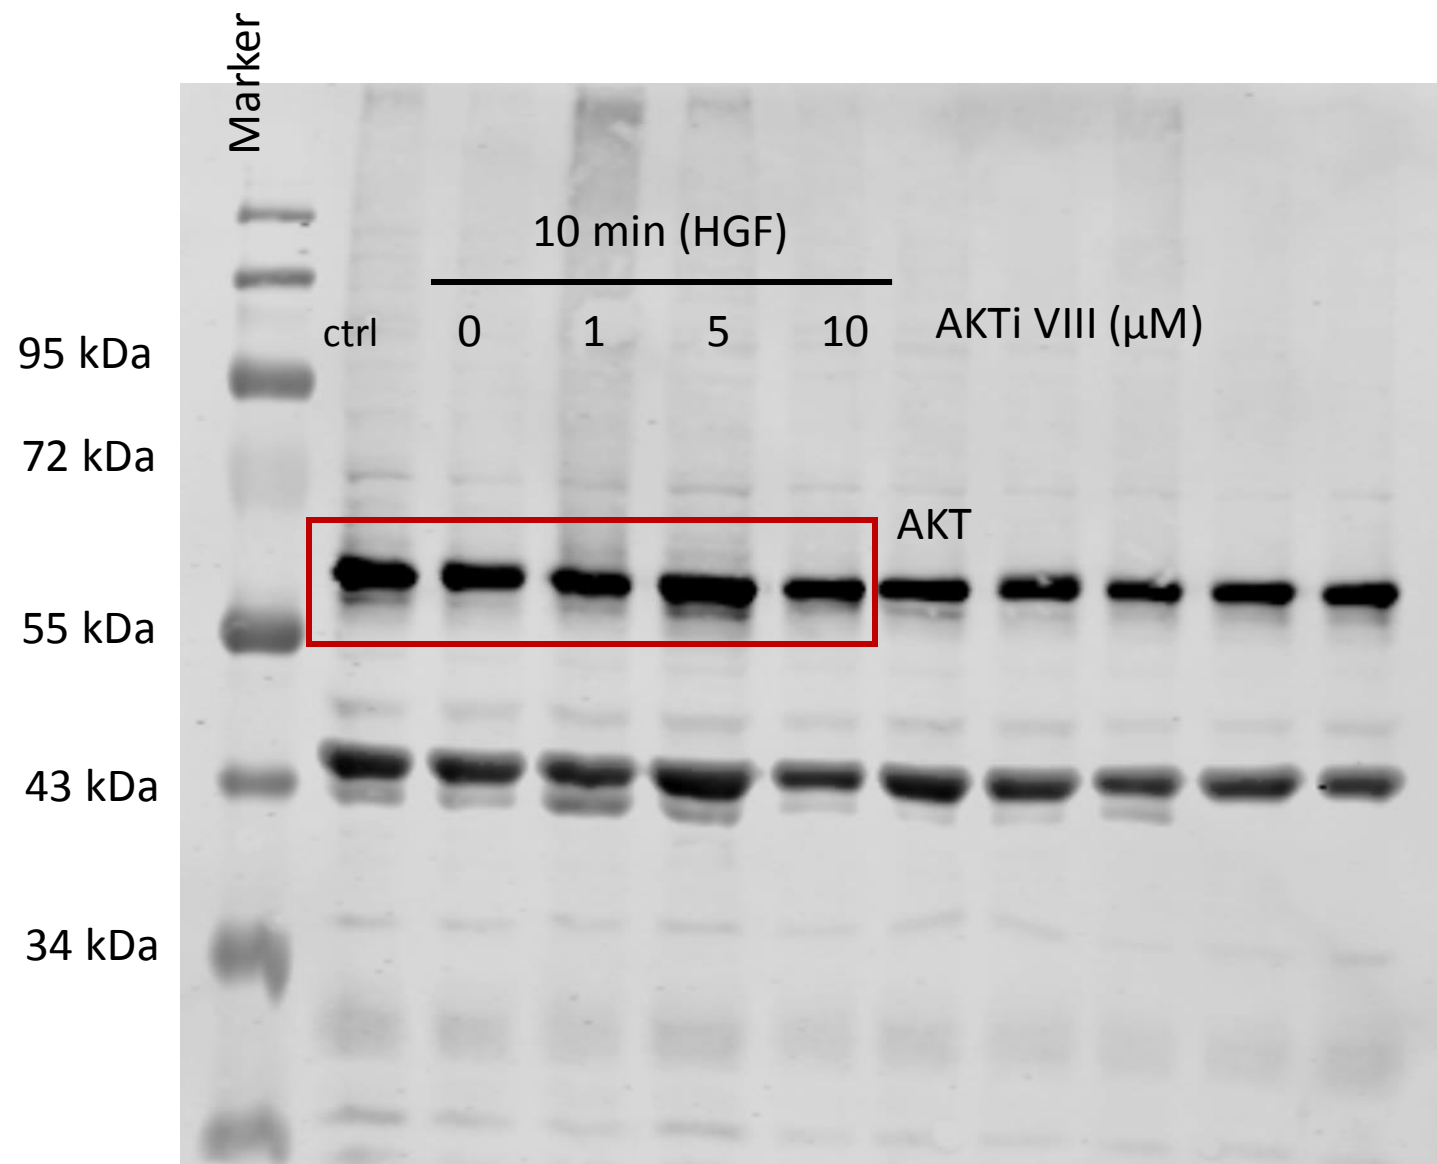

Fig 4 E

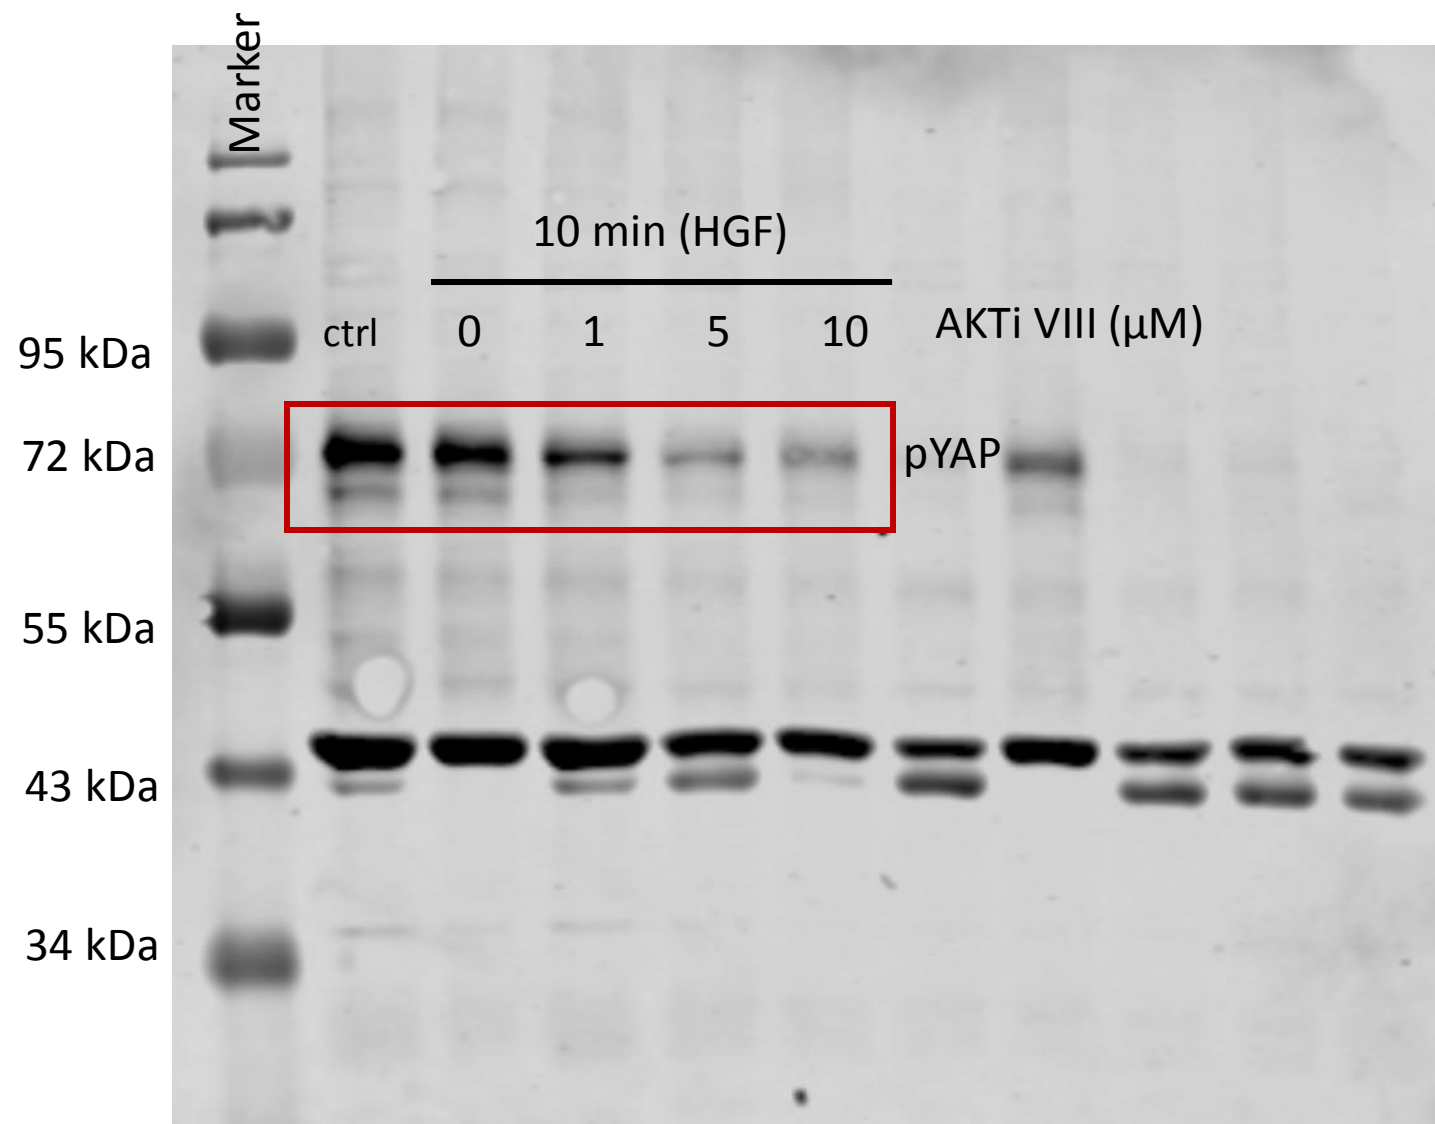

Fig 4 E

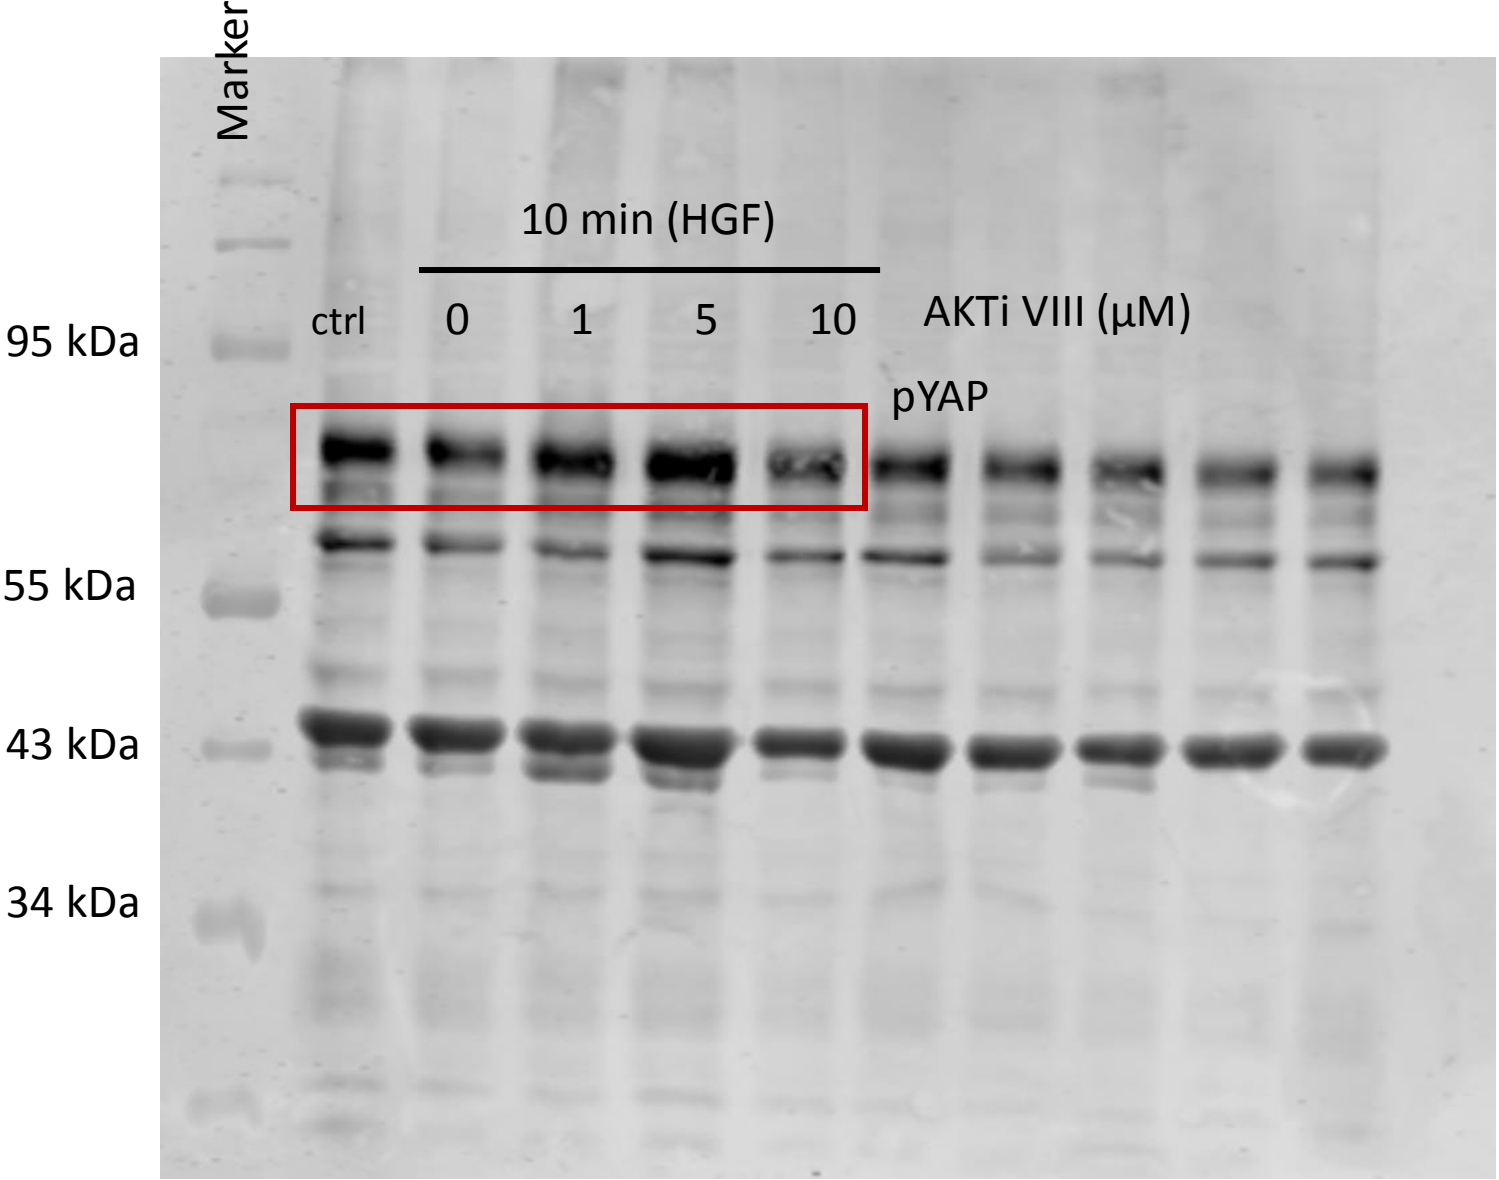

Supplement: fig4-data1 [file elife-78540-fig4-data1-v1.zip]

Fig 4 C (pYAP + actin)

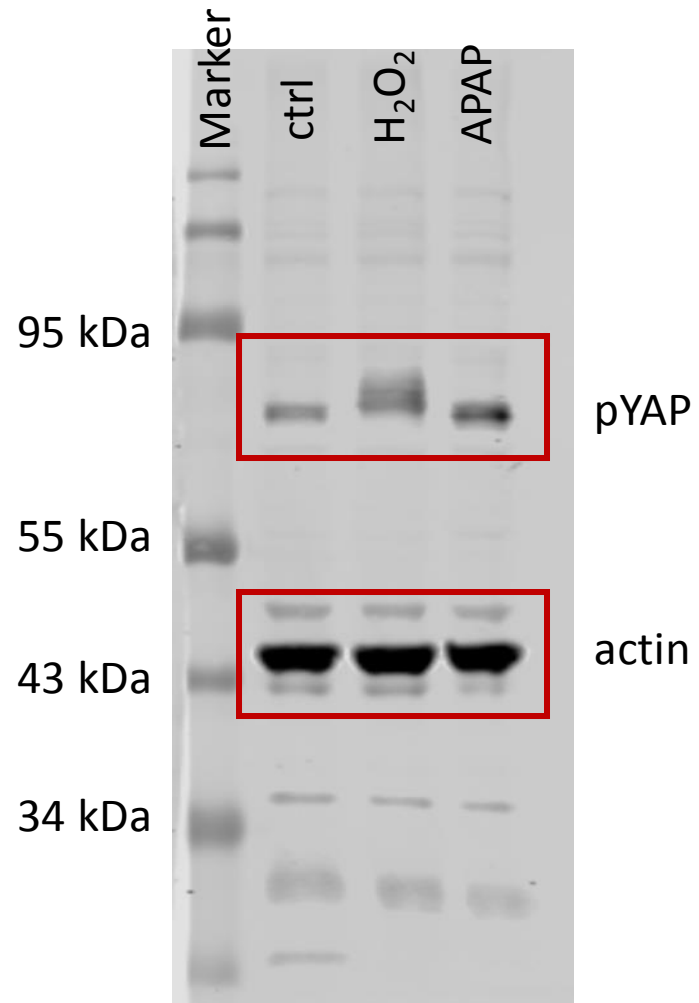

Fig 4 C (YAP)

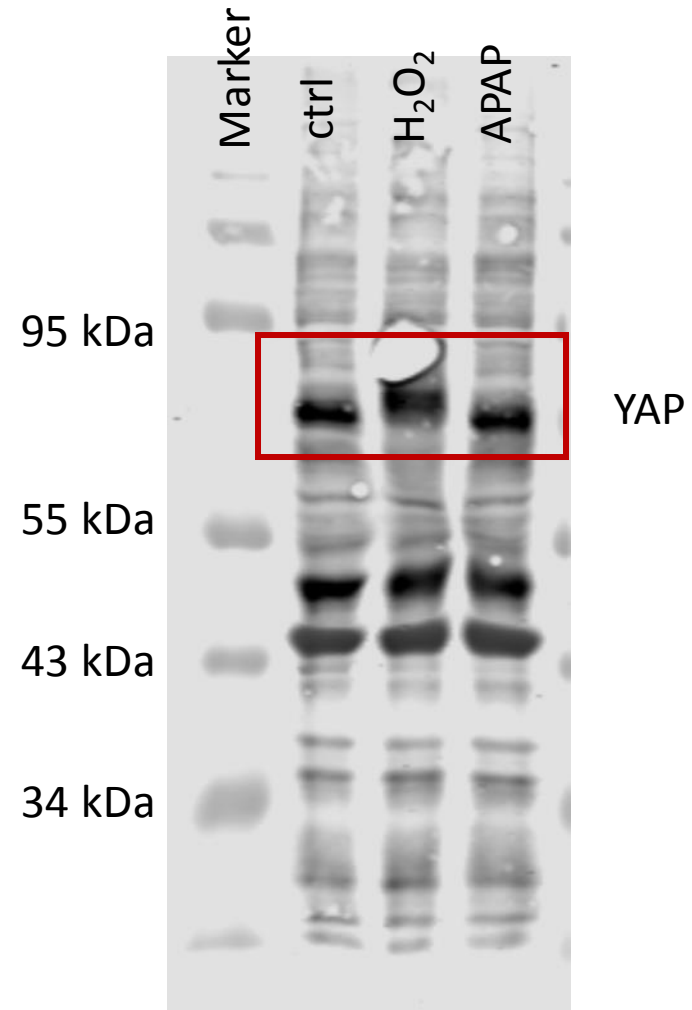

Fig 4 C (pAKT)

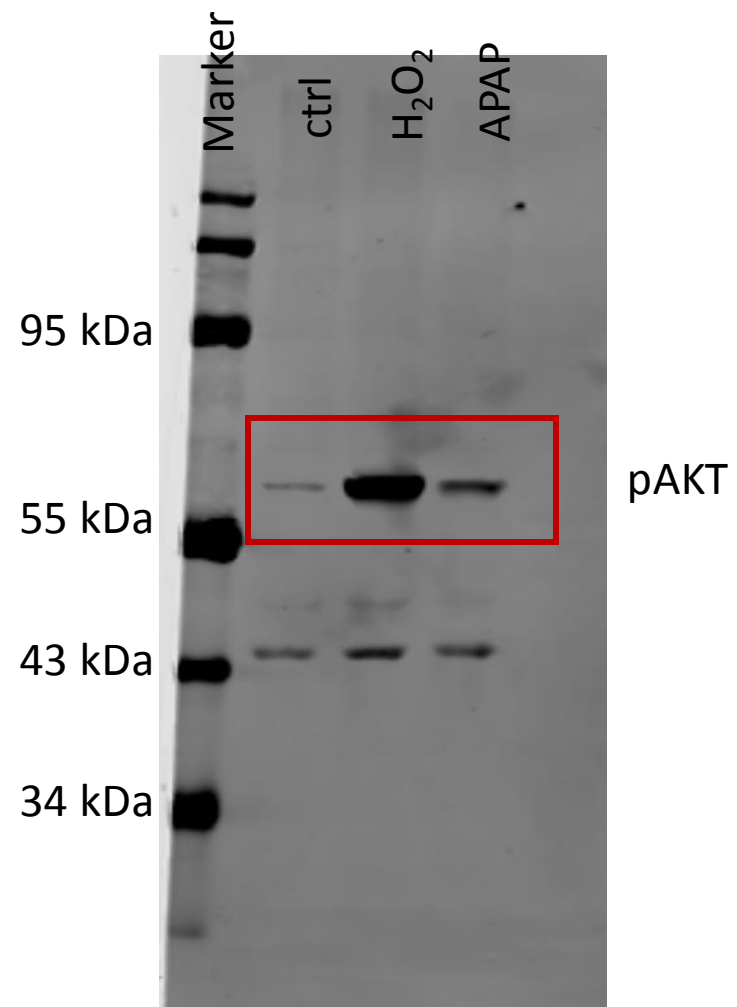

Fig 4 C (AKT)

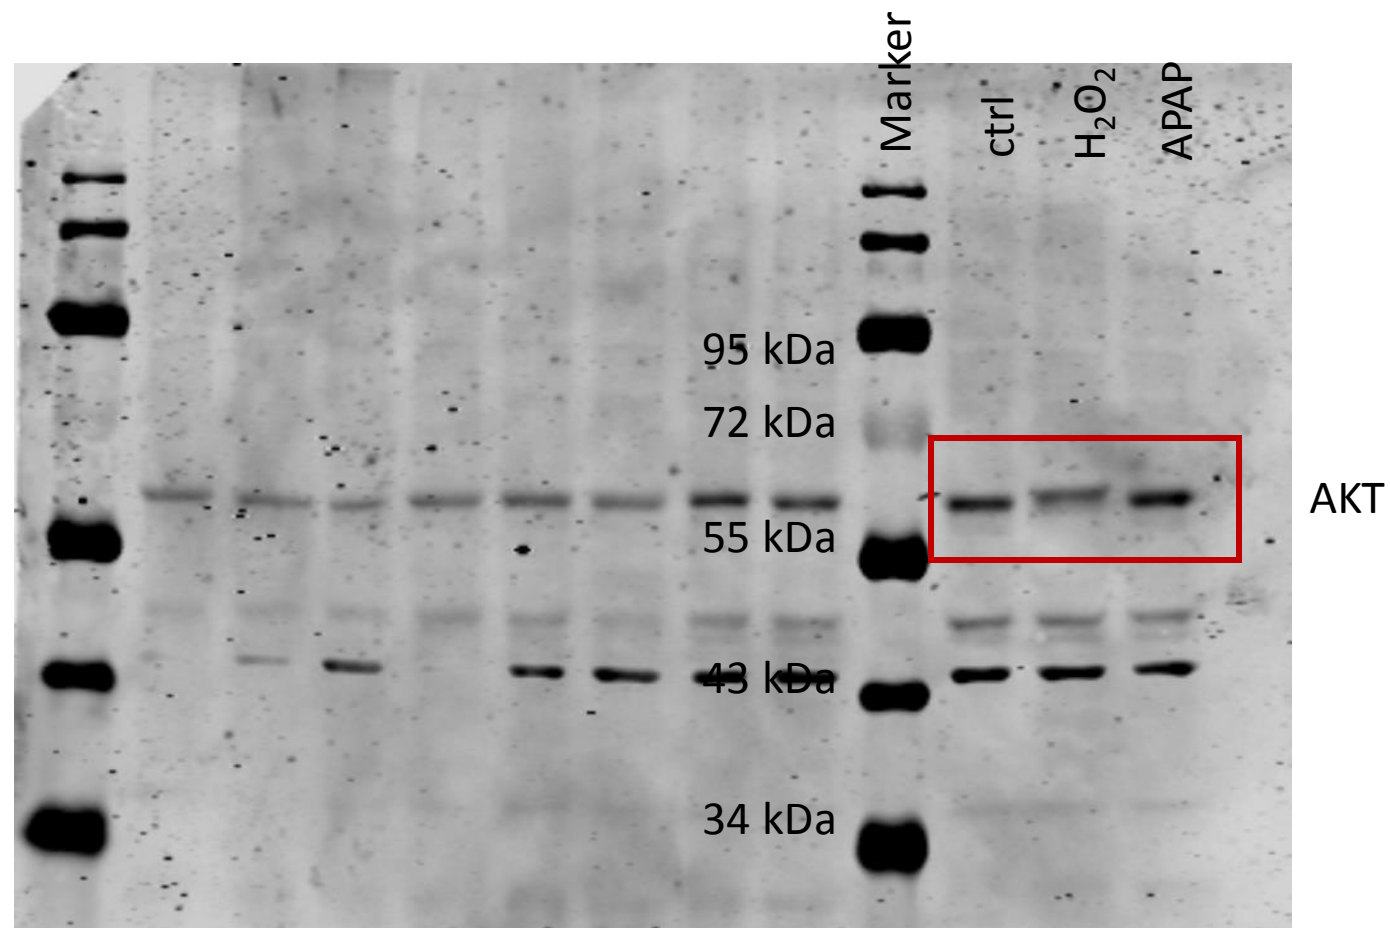

Supplement: fig4-data1 [file elife-78540-fig4-data1-v1.zip]
